# Supplementary material
Source: PubMed Central journal article supplement (PMC3910427)
Supplement: NIHMS544570-supplement-04.pdf [file NIHMS544570-supplement-04.pdf]

| featureNames | logFC  | AveExpr | t     | P.Value  | adj.P.Val | B     | ENTREZID                  | SYMBOL       | GENENAME                                                                                     | ENSEMBL                            |
|--------------|--------|---------|-------|----------|-----------|-------|---------------------------|--------------|----------------------------------------------------------------------------------------------|------------------------------------|
| A_23_P360213 | 2.846  | 13.91   | 62.4  | 6.33E-12 | 2.75E-07  | 15.11 | <a href="#">NA</a>        | NA           | NA                                                                                           | <a href="#">NA</a>                 |
| A_24_P913056 | 1.882  | 11.38   | 51.66 | 2.80E-11 | 4.05E-07  | 14.72 | <a href="#">5339</a>      | PLEC         | plectin                                                                                      | <a href="#">ENSG00000178209</a>    |
| A_24_P89457  | 1.578  | 8.428   | 42.11 | 1.40E-10 | 1.22E-06  | 14.16 | <a href="#">1026</a>      | CDKN1A       | cyclin-dependent kinase inhibitor 1A (p21 Cip1)                                              | <a href="#">ENSG00000124762</a>    |
| A_23_P66774  | 1.242  | 9.884   | 37.06 | 3.83E-10 | 2.37E-06  | 13.73 | <a href="#">124975</a>    | GGT6         | gamma-glutamyltransferase 6                                                                  | <a href="#">ENSG00000167741</a>    |
| A_24_P402261 | 1.528  | 6.955   | 34    | 7.53E-10 | 2.97E-06  | 13.4  | <a href="#">440836</a>    | ODF3B        | outer dense fiber of sperm tails 3B                                                          | <a href="#">ENSG00000177989</a>    |
| A_24_P181731 | 1.279  | 8.919   | 31.89 | 1.25E-09 | 3.65E-06  | 13.13 | <a href="#">8425</a>      | LTBP4        | latent transforming growth factor beta binding protein 4                                     | <a href="#">ENSG00000090006</a>    |
| A_23_P132932 | 1.298  | 7.919   | 31.81 | 1.27E-09 | 3.65E-06  | 13.12 | <a href="#">1609</a>      | DGKQ         | diacylglycerol kinase theta 110kDa                                                           | <a href="#">ENSG00000145214</a>    |
| A_23_P256603 | 2.585  | 9.822   | 31.58 | 1.35E-09 | 3.65E-06  | 13.09 | <a href="#">4301</a>      | MLLT4        | myeloid/lymphoid or mixed-lineage leukemia (trithorax homolog Drosophila); translocated to 4 | <a href="#">ENSG00000130396</a>    |
| A_24_P155058 | 1.685  | 7.75    | 30.78 | 1.65E-09 | 3.97E-06  | 12.98 | <a href="#">3551</a>      | IKBKB        | inhibitor of kappa light polypeptide gene enhancer in B-cells kinase beta                    | <a href="#">ENSG00000104365</a>    |
| A_23_P254888 | 1.204  | 10.76   | 29.84 | 2.09E-09 | 4.46E-06  | 12.84 | <a href="#">7791</a>      | ZYX          | zyxin                                                                                        | <a href="#">ENSG00000159840</a>    |
| A_24_P37665  | 1.249  | 9.541   | 29.73 | 2.16E-09 | 4.46E-06  | 12.82 | <a href="#">10861</a>     | SLC26A1      | solute carrier family 26 (sulfate transporter) member 1                                      | <a href="#">ENSG00000145217</a>    |
| A_24_P350124 | 1.861  | 9.379   | 29.26 | 2.45E-09 | 4.82E-06  | 12.75 | <a href="#">57674</a>     | RNF213       | ring finger protein 213                                                                      | ENSG00000173821<br>ENSG00000180843 |
| A_23_P26468  | 1.298  | 8.838   | 28.34 | 3.14E-09 | 5.48E-06  | 12.59 | <a href="#">9028</a>      | RHBDL1       | rhomoid veinlet-like 1 (Drosophila)                                                          | <a href="#">ENSG00000103269</a>    |
| A_23_P107735 | 1.246  | 8.351   | 28.32 | 3.16E-09 | 5.48E-06  | 12.59 | <a href="#">973</a>       | CD79A        | CD79a molecule immunoglobulin-associated alpha                                               | <a href="#">ENSG00000105369</a>    |
| A_23_P56150  | 1.086  | 9.017   | 27.84 | 3.61E-09 | 6.01E-06  | 12.51 | <a href="#">84839</a>     | RAX2         | retina and anterior neural fold homeobox 2                                                   | <a href="#">ENSG00000173976</a>    |
| A_23_P49443  | 1.148  | 8.329   | 27.62 | 3.84E-09 | 6.01E-06  | 12.47 | <a href="#">115</a>       | ADCY9        | adenylate cyclase 9                                                                          | <a href="#">ENSG00000162104</a>    |
| A_24_P281497 | 1.527  | 8.86    | 27.1  | 4.46E-09 | 6.04E-06  | 12.38 | <a href="#">116983</a>    | ACAP3        | ArfGAP with coiled-coil ankyrin repeat and PH domains 3                                      | <a href="#">ENSG00000131584</a>    |
| A_32_P173298 | 1.169  | 9.915   | 26.56 | 5.22E-09 | 6.37E-06  | 12.27 | <a href="#">23450</a>     | SF3B3        | splicing factor 3b subunit 3 130kDa                                                          | <a href="#">ENSG00000189091</a>    |
| A_23_P56673  | 0.9955 | 7.405   | 26.51 | 5.29E-09 | 6.37E-06  | 12.26 | <a href="#">83444</a>     | INO80B       | INO80 complex subunit B                                                                      | <a href="#">ENSG00000115274</a>    |
| A_23_P30972  | 1.401  | 9.13    | 26.25 | 5.72E-09 | 6.70E-06  | 12.21 | <a href="#">10973</a>     | ASCC3        | activating signal cointegrator 1 complex subunit 3                                           | <a href="#">ENSG00000112249</a>    |
| A_24_P237231 | 0.8976 | 9.881   | 25.81 | 6.53E-09 | 7.26E-06  | 12.13 | <a href="#">150094</a>    | SIK1         | salt-inducible kinase 1                                                                      | <a href="#">ENSG00000142178</a>    |
| A_24_P117866 | 0.8837 | 9.857   | 25.47 | 7.24E-09 | 7.65E-06  | 12.06 | <a href="#">118</a>       | ADD1         | adducin 1 (alpha)                                                                            | <a href="#">ENSG00000087274</a>    |
| A_32_P217471 | 0.8735 | 7.911   | 25.01 | 8.34E-09 | 8.15E-06  | 11.96 | <a href="#">4430</a>      | MYO1B        | myosin IB                                                                                    | <a href="#">ENSG00000128641</a>    |
| A_24_P247408 | 1.583  | 7.637   | 24.71 | 9.19E-09 | 8.15E-06  | 11.89 | <a href="#">399851</a>    | LOC399851    | hypothetical gene supported by AY129010                                                      | <a href="#">NA</a>                 |
| A_24_P290856 | 1.235  | 7.612   | 24.71 | 9.18E-09 | 8.15E-06  | 11.9  | <a href="#">5802</a>      | PTPRS        | protein tyrosine phosphatase receptor type S                                                 | <a href="#">ENSG00000105426</a>    |
| A_23_P13711  | 1.352  | 7.962   | 24.7  | 9.21E-09 | 8.15E-06  | 11.89 | <a href="#">8085</a>      | MLL2         | myeloid/lymphoid or mixed-lineage leukemia 2                                                 | <a href="#">ENSG00000167548</a>    |
| A_23_P215642 | 1.151  | 8.568   | 24.19 | 1.09E-08 | 8.88E-06  | 11.78 | <a href="#">64759</a>     | TNS3         | tensin 3                                                                                     | <a href="#">ENSG00000136205</a>    |
| A_24_P915734 | 1.112  | 7.288   | 23.78 | 1.24E-08 | 9.79E-06  | 11.69 | <a href="#">100289490</a> | LOC100289490 | hypothetical protein LOC100289490                                                            | <a href="#">NA</a>                 |
| A_24_P117902 | 1.26   | 10.11   | 22.95 | 1.63E-08 | 1.12E-05  | 11.49 | <a href="#">114884</a>    | OSBPL10      | oxysterol binding protein-like 10                                                            | <a href="#">ENSG00000144645</a>    |

|              |        |       |       |          |          |       |                        |          |                                                         |                                 |
|--------------|--------|-------|-------|----------|----------|-------|------------------------|----------|---------------------------------------------------------|---------------------------------|
| A_32_P161292 | 1.751  | 7.534 | 22.86 | 1.69E-08 | 1.12E-05 | 11.46 | <a href="#">91351</a>  | DDX60L   | DEAD (Asp-Glu-Ala-Asp) box polypeptide 60-like          | <a href="#">ENSG00000181381</a> |
| A_23_P135310 | 0.9246 | 6.958 | 22.35 | 2.01E-08 | 1.25E-05 | 11.34 | <a href="#">6812</a>   | STXBP1   | syntaxin binding protein 1                              | <a href="#">ENSG00000136854</a> |
| A_23_P118086 | 0.93   | 9.124 | 22.22 | 2.10E-08 | 1.27E-05 | 11.3  | <a href="#">124044</a> | SPATA2L  | spermatogenesis associated 2-like                       | <a href="#">ENSG00000158792</a> |
| A_23_P142671 | 1.448  | 11.08 | 22.2  | 2.11E-08 | 1.27E-05 | 11.3  | <a href="#">130557</a> | ZNF513   | zinc finger protein 513                                 | <a href="#">ENSG00000163795</a> |
| A_24_P209389 | 1.845  | 8.194 | 22.18 | 2.13E-08 | 1.27E-05 | 11.29 | <a href="#">51085</a>  | MLXIPL   | MLX interacting protein-like                            | <a href="#">ENSG00000009950</a> |
| A_23_P204079 | 1.31   | 8.487 | 21.92 | 2.33E-08 | 1.33E-05 | 11.22 | <a href="#">8620</a>   | NPFF     | neuropeptide FF-amide peptide precursor                 | <a href="#">ENSG00000139574</a> |
| A_24_P109524 | 0.9707 | 8.005 | 21.75 | 2.48E-08 | 1.35E-05 | 11.18 | <a href="#">54434</a>  | SSH1     | slingshot homolog 1 (Drosophila)                        | <a href="#">ENSG00000084112</a> |
| A_24_P895892 | 1.508  | 8.004 | 21.57 | 2.65E-08 | 1.40E-05 | 11.13 | <a href="#">23102</a>  | TBC1D2B  | TBC1 domain family member 2B                            | <a href="#">ENSG00000167202</a> |
| A_23_P218302 | 1.267  | 8.351 | 21.5  | 2.71E-08 | 1.42E-05 | 11.11 | <a href="#">84656</a>  | GLYR1    | glyoxylate reductase 1 homolog (Arabidopsis)            | <a href="#">ENSG00000140632</a> |
| A_24_P301954 | 0.8043 | 6.599 | 20.73 | 3.61E-08 | 1.72E-05 | 10.89 | <a href="#">114130</a> | MGC16384 | hypothetical LOC114130                                  | <a href="#">NA</a>              |
| A_32_P141374 | 1.466  | 10.21 | 20.66 | 3.70E-08 | 1.73E-05 | 10.87 | <a href="#">352954</a> | GATS     | GATS stromal antigen 3 opposite strand                  | <a href="#">ENSG00000160844</a> |
| A_24_P392723 | 1.207  | 6.947 | 20.65 | 3.71E-08 | 1.73E-05 | 10.87 | <a href="#">114819</a> | CROCCL2  | ciliary rootlet coiled-coil rootletin-like 2            | <a href="#">NA</a>              |
| A_23_P206466 | 0.8801 | 8.979 | 20.54 | 3.87E-08 | 1.78E-05 | 10.84 | <a href="#">57524</a>  | CASKIN1  | CASK interacting protein 1                              | <a href="#">ENSG00000167971</a> |
| A_24_P124097 | 0.7078 | 10.64 | 20.49 | 3.95E-08 | 1.78E-05 | 10.82 | <a href="#">64855</a>  | FAM129B  | family with sequence similarity 129 member B            | <a href="#">ENSG00000136830</a> |
| A_24_P914155 | 1.203  | 7.382 | 20.49 | 3.94E-08 | 1.78E-05 | 10.82 | <a href="#">159195</a> | USP54    | ubiquitin specific peptidase 54                         | <a href="#">ENSG00000166348</a> |
| A_23_P157943 | 1.312  | 7.768 | 20.44 | 4.02E-08 | 1.78E-05 | 10.81 | <a href="#">11253</a>  | MAN1B1   | mannosidase alpha class 1B member 1                     | <a href="#">ENSG00000177239</a> |
| A_24_P478495 | 1.025  | 8.754 | 20.37 | 4.13E-08 | 1.80E-05 | 10.79 | <a href="#">728229</a> | TMEM191B | transmembrane protein 191B                              | <a href="#">NA</a>              |
| A_23_P55926  | 0.7774 | 10.45 | 20.24 | 4.34E-08 | 1.81E-05 | 10.75 | <a href="#">7376</a>   | NR1H2    | nuclear receptor subfamily 1 group H member 2           | <a href="#">ENSG00000131408</a> |
| A_23_P66017  | 1.201  | 7.645 | 19.79 | 5.18E-08 | 1.97E-05 | 10.61 | <a href="#">112476</a> | PRRT2    | proline-rich transmembrane protein 2                    | <a href="#">ENSG00000167371</a> |
| A_32_P146815 | 0.8286 | 7.805 | 19.5  | 5.79E-08 | 2.06E-05 | 10.52 | <a href="#">4257</a>   | MGST1    | microsomal glutathione S-transferase 1                  | <a href="#">ENSG00000008394</a> |
| A_24_P41170  | 0.9863 | 5.953 | 19.16 | 6.64E-08 | 2.15E-05 | 10.41 | <a href="#">54477</a>  | PLEKHA5  | pleckstrin homology domain containing family A member 5 | <a href="#">ENSG00000052126</a> |
| A_23_P63219  | 0.9093 | 8.79  | 18.92 | 7.32E-08 | 2.25E-05 | 10.33 | <a href="#">23126</a>  | POGZ     | pogo transposable element with ZNF domain               | <a href="#">ENSG00000143442</a> |
| A_23_P368740 | 1.048  | 7.241 | 18.78 | 7.74E-08 | 2.25E-05 | 10.28 | <a href="#">83933</a>  | HDAC10   | histone deacetylase 10                                  | <a href="#">ENSG00000100429</a> |
| A_24_P130865 | 0.9055 | 6.816 | 18.66 | 8.15E-08 | 2.32E-05 | 10.24 | <a href="#">23133</a>  | PHF8     | PHD finger protein 8                                    | <a href="#">ENSG00000172943</a> |
| A_23_P256663 | 1.177  | 9.098 | 18.65 | 8.17E-08 | 2.32E-05 | 10.24 | <a href="#">8484</a>   | GALR3    | galanin receptor 3                                      | <a href="#">ENSG00000128310</a> |
| A_24_P326635 | 0.9927 | 9.505 | 18.55 | 8.54E-08 | 2.35E-05 | 10.2  | <a href="#">156</a>    | ADRBK1   | adrenergic beta receptor kinase 1                       | <a href="#">ENSG00000173020</a> |
| A_32_P37592  | 2.374  | 9.635 | 18.55 | 8.54E-08 | 2.35E-05 | 10.2  | <a href="#">677769</a> | SCARNA17 | small Cajal body-specific RNA 17                        | <a href="#">NA</a>              |
| A_24_P170801 | 0.9868 | 6.584 | 18.5  | 8.69E-08 | 2.35E-05 | 10.19 | <a href="#">727957</a> | HEATR7A  | HEAT repeat containing 7A                               | <a href="#">ENSG00000179832</a> |
| A_24_P256668 | 1.248  | 6.606 | 18.49 | 8.73E-08 | 2.35E-05 | 10.18 | <a href="#">1815</a>   | DRD4     | dopamine receptor D4                                    | <a href="#">ENSG00000069696</a> |
| A_23_P77807  | 1.466  | 8.856 | 18.38 | 9.15E-08 | 2.39E-05 | 10.14 | <a href="#">10743</a>  | RAI1     | retinoic acid induced 1                                 | <a href="#">ENSG00000108557</a> |
| A_23_P255011 | 0.9194 | 10.72 | 18.33 | 9.34E-08 | 2.42E-05 | 10.13 | <a href="#">56886</a>  | UGGT1    | UDP-glucose glycoprotein glucosyltransferase 1          | <a href="#">ENSG00000136731</a> |
| A_23_P397371 | 1.373  | 11.01 | 18.21 | 9.83E-08 | 2.44E-05 | 10.08 | <a href="#">27434</a>  | POLM     | polymerase (DNA directed) mu                            | <a href="#">ENSG00000122678</a> |
| A_24_P58331  | 1.217  | 10.01 | 18.01 | 1.07E-07 | 2.54E-05 | 10.01 | <a href="#">79877</a>  | DCAKD    | dephospho-CoA kinase domain containing                  | <a href="#">ENSG00000172992</a> |
| A_24_P44891  | 0.9473 | 9.725 | 17.94 | 1.11E-07 | 2.61E-05 | 9.986 | <a href="#">30000</a>  | TNPO2    | transportin 2                                           | <a href="#">ENSG00000105576</a> |
| A_24_P68050  | 1.313  | 6.823 | 17.85 | 1.15E-07 | 2.66E-05 | 9.954 | <a href="#">83985</a>  | SPNS1    | spinster homolog 1 (Drosophila)                         | <a href="#">ENSG00000169682</a> |

|              |        |       |       |          |          |       |                        |           |                                                            |                                                    |
|--------------|--------|-------|-------|----------|----------|-------|------------------------|-----------|------------------------------------------------------------|----------------------------------------------------|
| A_23_P304530 | 0.7879 | 8.176 | 17.83 | 1.16E-07 | 2.68E-05 | 9.946 | <a href="#">254910</a> | LCE5A     | late cornified envelope 5A                                 | <a href="#">ENSG00000186207</a>                    |
| A_24_P81789  | 1.61   | 10.31 | 17.76 | 1.20E-07 | 2.73E-05 | 9.92  | <a href="#">54509</a>  | RHOF      | ras homolog gene family member F (in filopodia)            | <a href="#">ENSG00000139725</a>                    |
| A_23_P130731 | 0.689  | 9.242 | 17.71 | 1.22E-07 | 2.76E-05 | 9.904 | <a href="#">79735</a>  | TBC1D17   | TBC1 domain family member 17                               | <a href="#">ENSG00000104946</a>                    |
| A_32_P222450 | 0.9984 | 8.614 | 17.65 | 1.25E-07 | 2.81E-05 | 9.88  | <a href="#">25907</a>  | TMEM158   | transmembrane protein 158                                  | NA                                                 |
| A_23_P208779 | 0.7148 | 10.2  | 17.6  | 1.28E-07 | 2.82E-05 | 9.863 | <a href="#">54869</a>  | EPS8L1    | EPS8-like 1                                                | <a href="#">ENSG00000131037</a>                    |
| A_23_P331028 | 1.748  | 13.73 | 17.59 | 1.29E-07 | 2.82E-05 | 9.859 | <a href="#">23389</a>  | MED13L    | mediator complex subunit 13-like                           | <a href="#">ENSG00000123066</a>                    |
| A_23_P38190  | 1.294  | 8.385 | 17.36 | 1.42E-07 | 3.07E-05 | 9.773 | <a href="#">94103</a>  | ORMDL3    | ORM1-like 3 (S. cerevisiae)                                | <a href="#">ENSG00000172057</a>                    |
| A_24_P416059 | 1.233  | 10.29 | 17.33 | 1.44E-07 | 3.07E-05 | 9.76  | <a href="#">4123</a>   | MAN2C1    | mannosidase alpha class 2C member 1                        | <a href="#">ENSG00000140400</a>                    |
| A_24_P285158 | 0.8546 | 8.81  | 17.27 | 1.48E-07 | 3.10E-05 | 9.739 | <a href="#">127943</a> | FCRLB     | Fc receptor-like B                                         | <a href="#">ENSG00000162746</a>                    |
| A_23_P142013 | 1.212  | 7.464 | 17.22 | 1.52E-07 | 3.13E-05 | 9.719 | <a href="#">56949</a>  | XAB2      | XPA binding protein 2                                      | <a href="#">ENSG00000076924</a>                    |
| A_24_P330030 | 0.7844 | 7.003 | 17.2  | 1.53E-07 | 3.15E-05 | 9.71  | <a href="#">220064</a> | ORAOV1    | oral cancer overexpressed 1                                | <a href="#">ENSG00000149716</a>                    |
| A_24_P161463 | 0.6808 | 11.65 | 17.01 | 1.67E-07 | 3.28E-05 | 9.635 | <a href="#">441951</a> | C20orf199 | chromosome 20 open reading frame 199                       | NA                                                 |
| A_23_P26426  | 0.9494 | 10.58 | 17    | 1.67E-07 | 3.28E-05 | 9.635 | <a href="#">27132</a>  | CPNE7     | copine VII                                                 | <a href="#">ENSG00000178773</a>                    |
| A_23_P150919 | 0.6118 | 8.952 | 16.94 | 1.72E-07 | 3.36E-05 | 9.61  | <a href="#">84876</a>  | ORAI1     | ORAI calcium release-activated calcium modulator 1         | <a href="#">ENSG00000182500</a>                    |
| A_24_P10674  | 1.11   | 10.46 | 16.64 | 1.98E-07 | 3.63E-05 | 9.489 | <a href="#">115703</a> | ARHGAP33  | Rho GTPase activating protein 33                           | <a href="#">ENSG00000004777</a>                    |
| A_24_P24263  | 0.9439 | 6.696 | 16.63 | 1.98E-07 | 3.63E-05 | 9.487 | <a href="#">10611</a>  | PDLIM5    | PDZ and LIM domain 5                                       | <a href="#">ENSG00000163110</a>                    |
| A_23_P23227  | 0.5915 | 8.617 | 16.62 | 2.00E-07 | 3.64E-05 | 9.481 | <a href="#">5586</a>   | PKN2      | protein kinase N2                                          | <a href="#">ENSG00000065243</a>                    |
| A_23_P103084 | 1.482  | 8.131 | 16.49 | 2.12E-07 | 3.75E-05 | 9.43  | <a href="#">10043</a>  | TOM1      | target of myb1 (chicken)                                   | <a href="#">ENSG00000100284</a>                    |
| A_23_P416191 | 0.6782 | 6.674 | 16.46 | 2.15E-07 | 3.75E-05 | 9.418 | <a href="#">259290</a> | TAS2R31   | taste receptor type 2 member 31                            | NA                                                 |
| A_24_P914495 | 0.7774 | 9.579 | 16.46 | 2.15E-07 | 3.75E-05 | 9.418 | <a href="#">2011</a>   | MARK2     | MAP/microtubule affinity-regulating kinase 2               | <a href="#">ENSG00000072518</a>                    |
| A_23_P130619 | 1.304  | 8.47  | 16.42 | 2.18E-07 | 3.79E-05 | 9.403 | <a href="#">6813</a>   | STXBP2    | syntaxin binding protein 2                                 | <a href="#">ENSG00000076944</a>                    |
| A_23_P47086  | 0.9778 | 7.067 | 16.37 | 2.24E-07 | 3.86E-05 | 9.379 | <a href="#">57830</a>  | KRTAP5-8  | keratin associated protein 5-8                             | ENSG00000204572<br><a href="#">ENSG00000241233</a> |
| A_24_P272160 | 1.141  | 7.98  | 16.27 | 2.35E-07 | 3.99E-05 | 9.338 | <a href="#">23218</a>  | NBEAL2    | neurobeachin-like 2                                        | <a href="#">ENSG00000160796</a>                    |
| A_32_P390781 | 1.49   | 7.771 | 16.11 | 2.54E-07 | 4.24E-05 | 9.271 | <a href="#">57455</a>  | REXO1     | REX1 RNA exonuclease 1 homolog (S. cerevisiae)             | <a href="#">ENSG00000079313</a>                    |
| A_23_P130761 | 1.031  | 7.705 | 16.07 | 2.59E-07 | 4.26E-05 | 9.254 | <a href="#">1628</a>   | DBP       | D site of albumin promoter (albumin D-box) binding protein | <a href="#">ENSG00000105516</a>                    |
| A_23_P384056 | 0.7579 | 9.864 | 16.05 | 2.61E-07 | 4.26E-05 | 9.248 | <a href="#">64770</a>  | CCDC14    | coiled-coil domain containing 14                           | <a href="#">ENSG00000175455</a>                    |
| A_32_P14669  | 0.9213 | 8.039 | 15.92 | 2.78E-07 | 4.51E-05 | 9.191 | <a href="#">7617</a>   | ZNF66     | zinc finger protein 66                                     | NA                                                 |
| A_23_P405282 | 0.8287 | 8.178 | 15.89 | 2.82E-07 | 4.54E-05 | 9.178 | <a href="#">284365</a> | MGC45922  | hypothetical LOC284365                                     | NA                                                 |
| A_24_P938293 | 0.7322 | 10.64 | 15.88 | 2.83E-07 | 4.54E-05 | 9.175 | <a href="#">3280</a>   | HES1      | hairy and enhancer of split 1 (Drosophila)                 | <a href="#">ENSG00000114315</a>                    |
| A_32_P98298  | 1.133  | 7.438 | 15.82 | 2.92E-07 | 4.61E-05 | 9.148 | <a href="#">1850</a>   | DUSP8     | dual specificity phosphatase 8                             | <a href="#">ENSG00000184545</a>                    |
| A_32_P148726 | 1.311  | 8.007 | 15.81 | 2.92E-07 | 4.61E-05 | 9.147 | <a href="#">389741</a> | MGC21881  | hypothetical locus MGC21881                                | NA                                                 |
| A_23_P48455  | 0.8693 | 7.475 | 15.77 | 2.99E-07 | 4.64E-05 | 9.126 | <a href="#">81693</a>  | AMN       | amniotless homolog (mouse)                                 | <a href="#">ENSG00000166126</a>                    |
| A_23_P131115 | 0.9626 | 8.221 | 15.76 | 3.00E-07 | 4.64E-05 | 9.121 | <a href="#">4782</a>   | NFIC      | nuclear factor I/C (CCAAT-binding transcription factor)    | <a href="#">ENSG00000141905</a>                    |
| A_24_P410516 | 1.375  | 9.287 | 15.74 | 3.03E-07 | 4.65E-05 | 9.113 | <a href="#">440295</a> | GOLGA6L9  | golgin A6 family-like 9                                    | ENSG00000196648<br><a href="#">ENSG00000197978</a> |

|              |        |       |       |          |          |       |                           |              |                                                                                 |                                 |
|--------------|--------|-------|-------|----------|----------|-------|---------------------------|--------------|---------------------------------------------------------------------------------|---------------------------------|
| A_24_P800604 | 1.391  | 10.5  | 15.71 | 3.07E-07 | 4.67E-05 | 9.101 | <a href="#">286077</a>    | FAM83H       | family with sequence similarity 83 member H                                     | <a href="#">ENSG00000180921</a> |
| A_23_P105307 | 0.5418 | 8.676 | 15.65 | 3.16E-07 | 4.71E-05 | 9.077 | <a href="#">1606</a>      | DGKA         | diacylglycerol kinase alpha 80kDa                                               | <a href="#">ENSG00000065357</a> |
| A_24_P230156 | 0.7384 | 7.904 | 15.6  | 3.24E-07 | 4.82E-05 | 9.053 | <a href="#">8629</a>      | JRK          | jerky homolog (mouse)                                                           | <a href="#">ENSG00000234616</a> |
| A_23_P56304  | 0.6131 | 7.778 | 15.5  | 3.41E-07 | 4.98E-05 | 9.008 | <a href="#">80264</a>     | ZNF430       | zinc finger protein 430                                                         | <a href="#">ENSG00000118620</a> |
| A_24_P649582 | 0.9726 | 8.803 | 15.5  | 3.41E-07 | 4.98E-05 | 9.009 | <a href="#">253039</a>    | LOC253039    | hypothetical LOC253039                                                          | <a href="#">NA</a>              |
| A_23_P37569  | 0.6674 | 7.481 | 15.42 | 3.55E-07 | 5.07E-05 | 8.972 | <a href="#">4122</a>      | MAN2A2       | mannosidase alpha class 2A member 2                                             | <a href="#">ENSG00000196547</a> |
| A_23_P36364  | 0.6785 | 8.172 | 15.39 | 3.60E-07 | 5.09E-05 | 8.959 | <a href="#">7070</a>      | THY1         | Thy-1 cell surface antigen                                                      | <a href="#">ENSG00000154096</a> |
| A_32_P20288  | 1.026  | 8.732 | 15.32 | 3.73E-07 | 5.15E-05 | 8.928 | <a href="#">64839</a>     | FBXL17       | F-box and leucine-rich repeat protein 17                                        | <a href="#">ENSG00000145743</a> |
| A_32_P163368 | 0.6159 | 5.943 | 15.17 | 4.02E-07 | 5.39E-05 | 8.861 | <a href="#">8993</a>      | PGLYRP1      | peptidoglycan recognition protein 1                                             | <a href="#">ENSG00000008438</a> |
| A_23_P371794 | 1.121  | 8.565 | 15.13 | 4.11E-07 | 5.43E-05 | 8.841 | <a href="#">784</a>       | CACNB3       | calcium channel voltage-dependent beta 3 subunit                                | <a href="#">ENSG00000167535</a> |
| A_24_P162172 | 1.516  | 8.706 | 15.1  | 4.15E-07 | 5.46E-05 | 8.831 | <a href="#">80208</a>     | SPG11        | spastic paraplegia 11 (autosomal recessive)                                     | <a href="#">ENSG00000104133</a> |
| A_24_P222043 | 1.447  | 11.13 | 15.03 | 4.31E-07 | 5.53E-05 | 8.796 | <a href="#">3159</a>      | HMGA1        | high mobility group AT-hook 1                                                   | <a href="#">ENSG00000137309</a> |
| A_24_P273063 | 1.161  | 8.413 | 15.03 | 4.31E-07 | 5.53E-05 | 8.797 | <a href="#">79870</a>     | BAALC        | brain and acute leukemia cytoplasmic                                            | <a href="#">ENSG00000164929</a> |
| A_24_P51360  | 0.7495 | 9.724 | 15.03 | 4.32E-07 | 5.53E-05 | 8.795 | <a href="#">51520</a>     | LARS         | leucyl-tRNA synthetase                                                          | <a href="#">ENSG00000133706</a> |
| A_32_P157192 | 0.8492 | 5.933 | 14.93 | 4.54E-07 | 5.67E-05 | 8.751 | <a href="#">22826</a>     | DNAJC8       | DnaJ (Hsp40) homolog subfamily C member 8                                       | <a href="#">ENSG00000126698</a> |
| A_24_P665504 | 0.7669 | 7.609 | 14.91 | 4.60E-07 | 5.73E-05 | 8.739 | <a href="#">100132062</a> | LOC100132062 | hypothetical LOC100132062                                                       | <a href="#">ENSG00000238035</a> |
| A_23_P90189  | 0.9521 | 10.91 | 14.86 | 4.71E-07 | 5.83E-05 | 8.717 | <a href="#">27113</a>     | BBC3         | BCL2 binding component 3                                                        | <a href="#">ENSG00000105327</a> |
| A_23_P204828 | 1.326  | 8.672 | 14.79 | 4.89E-07 | 5.94E-05 | 8.682 | <a href="#">7181</a>      | NR2C1        | nuclear receptor subfamily 2 group C member 1                                   | <a href="#">ENSG00000120798</a> |
| A_23_P118113 | 1.952  | 8.194 | 14.75 | 4.99E-07 | 5.98E-05 | 8.664 | <a href="#">6650</a>      | SOLH         | small optic lobes homolog (Drosophila)                                          | <a href="#">ENSG00000103326</a> |
| A_23_P115118 | 0.6958 | 11.16 | 14.74 | 5.00E-07 | 5.98E-05 | 8.663 | <a href="#">656</a>       | BMP8B        | bone morphogenetic protein 8b                                                   | <a href="#">ENSG00000116985</a> |
| A_24_P42436  | 0.8095 | 7.531 | 14.6  | 5.38E-07 | 6.26E-05 | 8.595 | <a href="#">9743</a>      | ARHGAP32     | Rho GTPase activating protein 32                                                | <a href="#">ENSG00000134909</a> |
| A_23_P329271 | 0.6451 | 10.36 | 14.56 | 5.51E-07 | 6.31E-05 | 8.573 | <a href="#">4157</a>      | MC1R         | melanocortin 1 receptor (alpha melanocyte stimulating hormone receptor)         | <a href="#">ENSG00000198211</a> |
| A_23_P55911  | 0.8424 | 7.341 | 14.52 | 5.61E-07 | 6.36E-05 | 8.558 | <a href="#">126070</a>    | ZNF440       | zinc finger protein 440                                                         | <a href="#">ENSG00000171295</a> |
| A_23_P349310 | 0.6486 | 7.906 | 14.47 | 5.78E-07 | 6.41E-05 | 8.53  | <a href="#">27327</a>     | TNRC6A       | trinucleotide repeat containing 6A                                              | <a href="#">ENSG00000090905</a> |
| A_32_P867789 | 1.199  | 7.742 | 14.47 | 5.77E-07 | 6.41E-05 | 8.532 | <a href="#">57642</a>     | COL20A1      | collagen type XX alpha 1                                                        | <a href="#">ENSG00000101203</a> |
| A_23_P116587 | 0.9692 | 6.204 | 14.46 | 5.81E-07 | 6.41E-05 | 8.525 | <a href="#">4975</a>      | OMP          | olfactory marker protein                                                        | <a href="#">NA</a>              |
| A_24_P73817  | 0.6618 | 6.425 | 14.42 | 5.92E-07 | 6.49E-05 | 8.507 | <a href="#">339105</a>    | POL3S        | polymerase 3                                                                    | <a href="#">ENSG00000151006</a> |
| A_24_P238649 | 0.9374 | 6.751 | 14.36 | 6.12E-07 | 6.60E-05 | 8.477 | <a href="#">388677</a>    | NOTCH2NL     | Notch homolog 2 (Drosophila) N-terminal like                                    | <a href="#">ENSG00000213240</a> |
| A_23_P323154 | 0.7668 | 7.617 | 14.31 | 6.29E-07 | 6.74E-05 | 8.453 | <a href="#">84662</a>     | GLIS2        | GLIS family zinc finger 2                                                       | <a href="#">ENSG00000126603</a> |
| A_23_P202156 | 1.218  | 11.02 | 14.29 | 6.34E-07 | 6.74E-05 | 8.444 | <a href="#">4791</a>      | NFKB2        | nuclear factor of kappa light polypeptide gene enhancer in B-cells 2 (p49/p100) | <a href="#">ENSG00000077150</a> |
| A_24_P142495 | 1.197  | 9.352 | 14.25 | 6.47E-07 | 6.76E-05 | 8.426 | <a href="#">81850</a>     | KRTAP1-3     | keratin associated protein 1-3                                                  | <a href="#">ENSG00000221880</a> |
| A_23_P396135 | 1.14   | 8.236 | 14.22 | 6.58E-07 | 6.82E-05 | 8.41  | <a href="#">1482</a>      | NKX2-5       | NK2 transcription factor related locus 5 (Drosophila)                           | <a href="#">ENSG00000183072</a> |
| A_24_P350744 | 1.199  | 8.352 | 14.21 | 6.61E-07 | 6.82E-05 | 8.406 | <a href="#">22889</a>     | KIAA0907     | KIAA0907                                                                        | <a href="#">ENSG00000132680</a> |

|              |        |       |       |          |          |       |                           |          |                                                                                               |                                                                                                       |
|--------------|--------|-------|-------|----------|----------|-------|---------------------------|----------|-----------------------------------------------------------------------------------------------|-------------------------------------------------------------------------------------------------------|
| A_24_P918157 | 0.7936 | 6.492 | 14.17 | 6.78E-07 | 6.90E-05 | 8.383 | <a href="#">9139</a>      | CBFA2T2  | core-binding factor runt domain alpha subunit 2; translocated to 2                            | <a href="#">ENSG00000078699</a>                                                                       |
| A_24_P373976 | 1.474  | 9.074 | 14.14 | 6.88E-07 | 6.92E-05 | 8.37  | <a href="#">6385</a>      | SDC4     | syndecan 4                                                                                    | <a href="#">ENSG00000124145</a>                                                                       |
| A_24_P932451 | 0.7944 | 6.609 | 14.11 | 6.98E-07 | 6.97E-05 | 8.356 | <a href="#">29994</a>     | BAZ2B    | bromodomain adjacent to zinc finger domain 2B                                                 | <a href="#">ENSG00000123636</a>                                                                       |
| A_24_P213884 | 1.265  | 8.683 | 14.02 | 7.33E-07 | 7.12E-05 | 8.31  | <a href="#">7148</a>      | TNXB     | tenascin XB                                                                                   | <a href="#">ENSG00000168477</a><br><a href="#">ENSG00000229353</a><br><a href="#">ENSG00000233323</a> |
| A_24_P238543 | 1.062  | 7.787 | 14.02 | 7.33E-07 | 7.12E-05 | 8.31  | <a href="#">5255</a>      | PHKA1    | phosphorylase kinase alpha 1 (muscle)                                                         | <a href="#">ENSG00000067177</a>                                                                       |
| A_23_P84670  | 0.8323 | 7.706 | 14    | 7.43E-07 | 7.16E-05 | 8.298 | <a href="#">2902</a>      | GRIN1    | glutamate receptor ionotropic N-methyl D-aspartate 1                                          | <a href="#">ENSG00000176884</a>                                                                       |
| A_23_P34018  | 0.5482 | 12.89 | 13.99 | 7.47E-07 | 7.17E-05 | 8.293 | <a href="#">6170</a>      | RPL39    | ribosomal protein L39                                                                         | <a href="#">ENSG00000198918</a>                                                                       |
| A_24_P316102 | 1.295  | 8.826 | 13.95 | 7.63E-07 | 7.24E-05 | 8.274 | <a href="#">8028</a>      | MLLT10   | myeloid/lymphoid or mixed-lineage leukemia (trithorax homolog Drosophila); translocated to 10 | <a href="#">ENSG00000078403</a>                                                                       |
| A_24_P37887  | 1.46   | 10.87 | 13.95 | 7.62E-07 | 7.24E-05 | 8.274 | <a href="#">285601</a>    | GPR150   | G protein-coupled receptor 150                                                                | <a href="#">ENSG00000178015</a>                                                                       |
| A_23_P409723 | 0.7565 | 6.563 | 13.92 | 7.73E-07 | 7.29E-05 | 8.261 | <a href="#">254896</a>    | MGC31957 | hypothetical protein MGC31957                                                                 | <a href="#">NA</a>                                                                                    |
| A_23_P368187 | 1.221  | 9.106 | 13.89 | 7.89E-07 | 7.39E-05 | 8.242 | <a href="#">4665</a>      | NAB2     | NGFI-A binding protein 2 (EGR1 binding protein 2)                                             | <a href="#">ENSG00000166886</a>                                                                       |
| A_23_P72840  | 0.6353 | 6.883 | 13.88 | 7.92E-07 | 7.39E-05 | 8.239 | <a href="#">54344</a>     | DPM3     | dolichyl-phosphate mannosyltransferase polypeptide 3                                          | <a href="#">ENSG00000179085</a>                                                                       |
| A_24_P337867 | 0.5687 | 7.683 | 13.87 | 7.97E-07 | 7.42E-05 | 8.232 | <a href="#">80228</a>     | Orai2    | Orai calcium release-activated calcium modulator 2                                            | <a href="#">ENSG00000160991</a>                                                                       |
| A_24_P926770 | 0.9559 | 7.466 | 13.86 | 8.03E-07 | 7.42E-05 | 8.226 | <a href="#">26020</a>     | LRP10    | low density lipoprotein receptor-related protein 10                                           | <a href="#">ENSG00000197324</a>                                                                       |
| A_23_P395365 | 0.5063 | 6.534 | 13.85 | 8.04E-07 | 7.42E-05 | 8.225 | <a href="#">954</a>       | ENTPD2   | ectonucleoside triphosphate diphosphohydrolase 2                                              | <a href="#">ENSG00000054179</a>                                                                       |
| A_23_P3900   | 0.9053 | 7.144 | 13.83 | 8.12E-07 | 7.42E-05 | 8.215 | <a href="#">23558</a>     | WBP2     | WW domain binding protein 2                                                                   | <a href="#">ENSG00000132471</a>                                                                       |
| A_24_P126873 | 0.7635 | 7.676 | 13.83 | 8.13E-07 | 7.42E-05 | 8.214 | <a href="#">6830</a>      | SUPT6H   | suppressor of Ty 6 homolog (S. cerevisiae)                                                    | <a href="#">ENSG00000109111</a>                                                                       |
| A_24_P355609 | 1.071  | 8.353 | 13.83 | 8.16E-07 | 7.42E-05 | 8.211 | <a href="#">116535</a>    | MRGPRF   | MAS-related GPR member F                                                                      | <a href="#">ENSG00000172935</a>                                                                       |
| A_24_P775659 | 0.5164 | 6.92  | 13.83 | 8.14E-07 | 7.42E-05 | 8.213 | <a href="#">23217</a>     | ZFR2     | zinc finger RNA binding protein 2                                                             | <a href="#">ENSG00000105278</a>                                                                       |
| A_32_P38467  | 0.5143 | 11.55 | 13.81 | 8.25E-07 | 7.45E-05 | 8.2   | <a href="#">100093630</a> | SNHG8    | small nucleolar RNA host gene 8 (non-protein coding)                                          | <a href="#">NA</a>                                                                                    |
| A_24_P729905 | 1.213  | 9.372 | 13.7  | 8.74E-07 | 7.74E-05 | 8.147 | <a href="#">653268</a>    | AGAP7    | ArfGAP with GTPase domain ankyrin repeat and PH domain 7                                      | <a href="#">ENSG00000204169</a>                                                                       |
| A_32_P66091  | 0.6782 | 6.049 | 13.68 | 8.84E-07 | 7.79E-05 | 8.136 | <a href="#">8844</a>      | KSR1     | kinase suppressor of ras 1                                                                    | <a href="#">ENSG00000141068</a>                                                                       |
| A_24_P340853 | 0.748  | 6.75  | 13.67 | 8.91E-07 | 7.83E-05 | 8.128 | <a href="#">84875</a>     | PARP10   | poly (ADP-ribose) polymerase family member 10                                                 | <a href="#">ENSG00000178685</a>                                                                       |
| A_24_P8318   | 0.6823 | 7.902 | 13.65 | 8.98E-07 | 7.87E-05 | 8.122 | <a href="#">27125</a>     | AFF4     | AF4/FMR2 family member 4                                                                      | <a href="#">ENSG00000072364</a>                                                                       |
| A_32_P98227  | 1.064  | 7.382 | 13.65 | 9.01E-07 | 7.88E-05 | 8.118 | <a href="#">11155</a>     | LDB3     | LIM domain binding 3                                                                          | <a href="#">ENSG00000122367</a>                                                                       |
| A_23_P401524 | 0.7734 | 9.28  | 13.64 | 9.07E-07 | 7.91E-05 | 8.112 | <a href="#">1339</a>      | COX6A2   | cytochrome c oxidase subunit VIa polypeptide 2                                                | <a href="#">ENSG00000156885</a>                                                                       |
| A_23_P114707 | 1.159  | 8.002 | 13.63 | 9.10E-07 | 7.92E-05 | 8.109 | <a href="#">9563</a>      | H6PD     | hexose-6-phosphate dehydrogenase (glucose 1-dehydrogenase)                                    | <a href="#">ENSG00000049239</a>                                                                       |
| A_23_P251216 | 0.9729 | 6.294 | 13.59 | 9.30E-07 | 8.06E-05 | 8.089 | <a href="#">55187</a>     | VPS13D   | vacuolar protein sorting 13 homolog D (S. cerevisiae)                                         | <a href="#">ENSG00000048707</a>                                                                       |

|              |        |       |       |          |           |       |                           |                   |                                                                              |                                 |
|--------------|--------|-------|-------|----------|-----------|-------|---------------------------|-------------------|------------------------------------------------------------------------------|---------------------------------|
| A_23_P550    | 0.5646 | 8.311 | 13.59 | 9.28E-07 | 8.06E-05  | 8.09  | <a href="#">405</a>       | ARNT              | aryl hydrocarbon receptor nuclear translocator                               | <a href="#">ENSG00000143437</a> |
| A_32_P86150  | 0.8743 | 8.248 | 13.57 | 9.42E-07 | 8.14E-05  | 8.077 | <a href="#">440387</a>    | CTRB2             | chymotrypsinogen B2                                                          | <a href="#">ENSG00000168928</a> |
| A_24_P291016 | 0.7005 | 8.072 | 13.5  | 9.81E-07 | 8.36E-05  | 8.039 | <a href="#">25</a>        | ABL1              | c-abl oncogene 1 receptor tyrosine kinase                                    | <a href="#">ENSG00000097007</a> |
| A_23_P6561   | 0.9068 | 8.125 | 13.46 | 1.00E-06 | 8.48E-05  | 8.018 | <a href="#">55096</a>     | FLJ10213          | hypothetical protein FLJ10213                                                | <a href="#">NA</a>              |
| A_24_P555791 | 0.6566 | 6.844 | 13.46 | 1.00E-06 | 8.48E-05  | 8.018 | <a href="#">8924</a>      | HERC2             | hect domain and RLD 2                                                        | <a href="#">ENSG00000128731</a> |
| A_24_P930276 | 0.6755 | 7.222 | 13.46 | 1.00E-06 | 8.48E-05  | 8.018 | <a href="#">4779</a>      | NFE2L1            | nuclear factor (erythroid-derived 2)-like 1                                  | <a href="#">ENSG00000082641</a> |
| A_23_P209408 | 0.6452 | 7.848 | 13.44 | 1.01E-06 | 8.52E-05  | 8.011 | <a href="#">843</a>       | CASP10            | caspace 10 apoptosis-related cysteine peptidase                              | <a href="#">ENSG00000003400</a> |
| A_24_P139229 | 1.543  | 8.315 | 13.43 | 1.02E-06 | 8.54E-05  | 8.004 | <a href="#">23275</a>     | POFUT2            | protein O-fucosyltransferase 2                                               | <a href="#">ENSG00000186866</a> |
| A_24_P358244 | 1.14   | 9.913 | 13.4  | 1.04E-06 | 8.66E-05  | 7.985 | <a href="#">22879</a>     | MON1B             | MON1 homolog B (yeast)                                                       | <a href="#">ENSG00000103111</a> |
| A_24_P331711 | 0.5323 | 6.814 | 13.38 | 1.05E-06 | 8.68E-05  | 7.977 | <a href="#">284486</a>    | THEM5             | thioesterase superfamily member 5                                            | <a href="#">ENSG00000196407</a> |
| A_24_P58283  | 1.036  | 8.705 | 13.37 | 1.05E-06 | 8.68E-05  | 7.972 | <a href="#">6670</a>      | SP3               | Sp3 transcription factor                                                     | <a href="#">ENSG00000172845</a> |
| A_32_P93328  | 1.058  | 8.064 | 13.37 | 1.05E-06 | 8.68E-05  | 7.974 | <a href="#">100134713</a> | LOC100134713<br>3 | hypothetical protein LOC100134713                                            | <a href="#">NA</a>              |
| A_23_P9926   | 1.088  | 9.018 | 13.36 | 1.06E-06 | 8.68E-05  | 7.967 | <a href="#">83882</a>     | TSPAN10           | tetraspanin 10                                                               | <a href="#">ENSG00000182612</a> |
| A_32_P180741 | 0.6903 | 6.464 | 13.36 | 1.06E-06 | 8.68E-05  | 7.967 | <a href="#">10188</a>     | TNK2              | tyrosine kinase non-receptor 2                                               | <a href="#">ENSG00000061938</a> |
| A_23_P138000 | 0.8307 | 7.165 | 13.34 | 1.07E-06 | 8.72E-05  | 7.957 | <a href="#">10500</a>     | SEMA6C            | sema domain transmembrane domain (TM) and cytoplasmic domain (semaphorin) 6C | <a href="#">ENSG00000143434</a> |
| A_23_P8797   | 1.219  | 8.448 | 13.32 | 1.09E-06 | 8.81E-05  | 7.943 | <a href="#">5383</a>      | PMS2L5            | postmeiotic segregation increased 2-like 5                                   | <a href="#">ENSG00000123965</a> |
| A_24_P40061  | 0.8674 | 7.702 | 13.28 | 1.11E-06 | 8.87E-05  | 7.925 | <a href="#">114823</a>    | LENG8             | leukocyte receptor cluster (LRC) member 8                                    | <a href="#">ENSG00000167615</a> |
| A_23_P68868  | 0.8149 | 8.477 | 13.25 | 1.13E-06 | 8.98E-05  | 7.908 | <a href="#">55000</a>     | TUG1              | taurine upregulated 1 (non-protein coding)                                   | <a href="#">NA</a>              |
| A_23_P11936  | 0.8808 | 7.15  | 13.21 | 1.15E-06 | 9.10E-05  | 7.885 | <a href="#">91544</a>     | UBXN11            | UBX domain protein 11                                                        | <a href="#">ENSG00000158062</a> |
| A_23_P9688   | 0.7516 | 8.77  | 13.21 | 1.15E-06 | 9.10E-05  | 7.887 | <a href="#">1783</a>      | DYNC1LI2          | dynein cytoplasmic 1 light intermediate chain 2                              | <a href="#">ENSG00000135720</a> |
| A_24_P366735 | 1.091  | 7.152 | 13.2  | 1.16E-06 | 9.11E-05  | 7.882 | <a href="#">57492</a>     | ARID1B            | AT rich interactive domain 1B (SWI1-like)                                    | <a href="#">ENSG00000049618</a> |
| A_24_P415618 | 1.149  | 8.912 | 13.18 | 1.17E-06 | 9.18E-05  | 7.871 | <a href="#">22877</a>     | MLXIP             | MLX interacting protein                                                      | <a href="#">ENSG00000175727</a> |
| A_23_P29985  | 0.7995 | 7.55  | 13.17 | 1.18E-06 | 9.18E-05  | 7.864 | <a href="#">152992</a>    | C4orf23           | chromosome 4 open reading frame 23                                           | <a href="#">ENSG00000155275</a> |
| A_23_P207596 | 0.5722 | 8.967 | 13.16 | 1.19E-06 | 9.20E-05  | 7.858 | <a href="#">4763</a>      | NF1               | neurofibromin 1                                                              | <a href="#">ENSG00000196712</a> |
| A_32_P184518 | 0.4428 | 12.46 | 13.16 | 1.19E-06 | 9.20E-05  | 7.856 | <a href="#">6144</a>      | RPL21             | ribosomal protein L21                                                        | <a href="#">ENSG00000122026</a> |
| A_23_P258381 | 0.9406 | 8.243 | 13.15 | 1.19E-06 | 9.22E-05  | 7.853 | <a href="#">92369</a>     | SPSB4             | splA/ryanodine receptor domain and SOCS box containing 4                     | <a href="#">ENSG00000175093</a> |
| A_24_P333901 | 0.6285 | 8.149 | 13.12 | 1.21E-06 | 9.32E-05  | 7.838 | <a href="#">23334</a>     | KIAA0467          | KIAA0467                                                                     | <a href="#">ENSG00000198198</a> |
| A_23_P150664 | 1.289  | 10.63 | 13.11 | 1.22E-06 | 9.38E-05  | 7.83  | <a href="#">387733</a>    | IFITM5            | interferon induced transmembrane protein 5                                   | <a href="#">ENSG00000206013</a> |
| A_24_P222454 | 0.7893 | 6.257 | 12.99 | 1.31E-06 | 9.79E-05  | 7.767 | <a href="#">51535</a>     | PPHLN1            | periphilin 1                                                                 | <a href="#">ENSG00000134283</a> |
| A_24_P399871 | 0.6262 | 10.7  | 12.99 | 1.31E-06 | 9.79E-05  | 7.763 | <a href="#">8911</a>      | CACNA11           | calcium channel voltage-dependent T type alpha 11 subunit                    | <a href="#">ENSG00000100346</a> |
| A_32_P120638 | 0.6659 | 7.203 | 12.99 | 1.31E-06 | 9.79E-05  | 7.764 | <a href="#">92105</a>     | INTS4             | integrator complex subunit 4                                                 | <a href="#">ENSG00000149262</a> |
| A_24_P102726 | 0.7208 | 8.504 | 12.97 | 1.33E-06 | 9.85E-05  | 7.752 | <a href="#">5498</a>      | PPOX              | protoporphyrinogen oxidase                                                   | <a href="#">ENSG00000143224</a> |
| A_23_P106258 | 0.4757 | 6.58  | 12.92 | 1.37E-06 | 0.0001003 | 7.725 | <a href="#">283600</a>    | C14orf68          | chromosome 14 open reading frame 68                                          | <a href="#">ENSG00000140107</a> |

|              |        |       |       |          |           |       |                           |                   |                                                                 |                                                    |
|--------------|--------|-------|-------|----------|-----------|-------|---------------------------|-------------------|-----------------------------------------------------------------|----------------------------------------------------|
| A_23_P107775 | 0.5092 | 6.247 | 12.91 | 1.37E-06 | 0.0001006 | 7.721 | <a href="#">147744</a>    | TMEM190           | transmembrane protein 190                                       | <a href="#">ENSG00000160472</a>                    |
| A_23_P342688 | 0.7353 | 6.434 | 12.9  | 1.38E-06 | 0.0001009 | 7.714 | <a href="#">84960</a>     | KIAA1984          | KIAA1984                                                        | <a href="#">ENSG00000213213</a>                    |
| A_23_P136413 | 1.336  | 8.731 | 12.89 | 1.39E-06 | 0.0001011 | 7.708 | <a href="#">4326</a>      | MMP17             | matrix metalloproteinase 17 (membrane-inserted)                 | <a href="#">ENSG00000198598</a>                    |
| A_23_P417282 | 0.5974 | 8.084 | 12.83 | 1.44E-06 | 0.0001034 | 7.677 | <a href="#">3480</a>      | IGF1R             | insulin-like growth factor 1 receptor                           | <a href="#">ENSG00000140443</a>                    |
| A_23_P168419 | 1.092  | 8.092 | 12.82 | 1.45E-06 | 0.0001041 | 7.668 | <a href="#">58508</a>     | MLL3              | myeloid/lymphoid or mixed-lineage leukemia 3                    | <a href="#">ENSG00000055609</a>                    |
| A_24_P9346   | 0.861  | 6.744 | 12.74 | 1.52E-06 | 0.0001081 | 7.624 | <a href="#">8831</a>      | SYNGAP1           | synaptic Ras GTPase activating protein 1 homolog (rat)          | ENSG00000197283<br><a href="#">ENSG00000227460</a> |
| A_24_P404593 | 0.9859 | 7.665 | 12.73 | 1.53E-06 | 0.0001087 | 7.617 | <a href="#">51816</a>     | CECR1             | cat eye syndrome chromosome region candidate 1                  | <a href="#">ENSG00000093072</a>                    |
| A_32_P319880 | 0.7636 | 7.161 | 12.7  | 1.56E-06 | 0.0001096 | 7.601 | <a href="#">57654</a>     | KIAA1530          | KIAA1530                                                        | <a href="#">ENSG00000163945</a>                    |
| A_23_P85853  | 0.7222 | 9.206 | 12.69 | 1.57E-06 | 0.0001098 | 7.595 | <a href="#">79639</a>     | TMEM53            | transmembrane protein 53                                        | <a href="#">ENSG00000126106</a>                    |
| A_24_P147910 | 0.7232 | 12.14 | 12.67 | 1.58E-06 | 0.0001103 | 7.584 | <a href="#">10801</a>     | 9-Sep             | septin 9                                                        | <a href="#">ENSG00000184640</a>                    |
| A_24_P163574 | 1.019  | 6.997 | 12.65 | 1.60E-06 | 0.0001107 | 7.574 | <a href="#">64599</a>     | GIGYF1            | GRB10 interacting GYF protein 1                                 | <a href="#">ENSG00000146830</a>                    |
| A_23_P402751 | 1.988  | 13.8  | 12.63 | 1.62E-06 | 0.0001115 | 7.564 | <a href="#">7088</a>      | TLE1              | transducin-like enhancer of split 1 (E(sp1) homolog Drosophila) | <a href="#">ENSG00000196781</a>                    |
| A_32_P110751 | 0.8634 | 9.795 | 12.61 | 1.64E-06 | 0.0001128 | 7.549 | <a href="#">1974</a>      | EIF4A2            | eukaryotic translation initiation factor 4A2                    | <a href="#">ENSG00000156976</a>                    |
| A_24_P143758 | 0.7005 | 8.17  | 12.58 | 1.67E-06 | 0.0001137 | 7.535 | <a href="#">100190939</a> | LOC100190939<br>9 | hypothetical LOC100190939                                       | <a href="#">NA</a>                                 |
| A_32_P129621 | 0.6782 | 9.386 | 12.57 | 1.68E-06 | 0.0001146 | 7.527 | <a href="#">6868</a>      | ADAM17            | ADAM metalloproteinase domain 17                                | <a href="#">ENSG00000151694</a>                    |
| A_23_P167093 | 1.046  | 8.853 | 12.52 | 1.73E-06 | 0.0001167 | 7.498 | <a href="#">3425</a>      | IDUA              | iduronidase alpha-L-                                            | <a href="#">ENSG00000127415</a>                    |
| A_24_P662086 | 0.5599 | 7.014 | 12.47 | 1.78E-06 | 0.0001186 | 7.471 | <a href="#">100128961</a> | GAPDH7            | glyceraldehyde-3-phosphate dehydrogenase-like 7 pseudogene      | <a href="#">NA</a>                                 |
| A_24_P212129 | 0.5748 | 8.481 | 12.45 | 1.80E-06 | 0.0001198 | 7.46  | <a href="#">7581</a>      | ZNF33A            | zinc finger protein 33A                                         | <a href="#">ENSG00000189180</a>                    |
| A_24_P12651  | 0.9911 | 7.825 | 12.37 | 1.90E-06 | 0.0001236 | 7.411 | <a href="#">23087</a>     | TRIM35            | tripartite motif-containing 35                                  | <a href="#">ENSG00000104228</a>                    |
| A_23_P99891  | 0.5889 | 8.673 | 12.34 | 1.94E-06 | 0.0001252 | 7.391 | <a href="#">59274</a>     | MESDC1            | mesoderm development candidate 1                                | <a href="#">ENSG00000140406</a>                    |
| A_24_P932760 | 1.022  | 7.184 | 12.33 | 1.95E-06 | 0.0001258 | 7.386 | <a href="#">3831</a>      | KLC1              | kinesin light chain 1                                           | <a href="#">ENSG00000126214</a>                    |
| A_23_P209316 | 0.5261 | 7.765 | 12.32 | 1.96E-06 | 0.0001261 | 7.38  | <a href="#">905</a>       | CCNT2             | cyclin T2                                                       | <a href="#">ENSG00000082258</a>                    |
| A_24_P305345 | 0.5761 | 6.123 | 12.32 | 1.96E-06 | 0.0001261 | 7.379 | <a href="#">30835</a>     | CD209             | CD209 molecule                                                  | <a href="#">ENSG00000090659</a>                    |
| A_23_P16476  | 0.948  | 7.349 | 12.29 | 2.00E-06 | 0.0001266 | 7.362 | <a href="#">83855</a>     | KLF16             | Kruppel-like factor 16                                          | <a href="#">ENSG00000129911</a>                    |
| A_24_P280390 | 0.9822 | 7.393 | 12.29 | 2.00E-06 | 0.0001266 | 7.361 | <a href="#">200312</a>    | RNF215            | ring finger protein 215                                         | <a href="#">ENSG00000099999</a>                    |
| A_24_P106502 | 1.845  | 7.987 | 12.28 | 2.01E-06 | 0.0001266 | 7.355 | <a href="#">29964</a>     | PRICKLE4          | prickle homolog 4 (Drosophila)                                  | <a href="#">ENSG00000124593</a>                    |
| A_24_P293089 | 0.9348 | 10.24 | 12.28 | 2.01E-06 | 0.0001266 | 7.358 | <a href="#">163033</a>    | ZNF579            | zinc finger protein 579                                         | <a href="#">ENSG00000218891</a>                    |
| A_24_P313576 | 0.4476 | 6.833 | 12.26 | 2.02E-06 | 0.0001271 | 7.349 | <a href="#">6844</a>      | VAMP2             | vesicle-associated membrane protein 2 (synaptobrevin 2)         | <a href="#">ENSG00000220205</a>                    |
| A_24_P921584 | 1.045  | 9.457 | 12.24 | 2.05E-06 | 0.0001284 | 7.335 | <a href="#">226</a>       | ALDOA             | aldolase A fructose-bisphosphate                                | <a href="#">ENSG00000149925</a>                    |
| A_23_P116435 | 0.5837 | 7.312 | 12.21 | 2.09E-06 | 0.0001297 | 7.319 | <a href="#">51214</a>     | IGF2AS            | insulin-like growth factor 2 antisense                          | <a href="#">ENSG00000099869</a>                    |
| A_23_P90339  | 0.6712 | 9.51  | 12.21 | 2.10E-06 | 0.0001297 | 7.316 | <a href="#">8175</a>      | SF3A2             | splicing factor 3a subunit 2 66kDa                              | <a href="#">ENSG00000104897</a>                    |
| A_32_P360193 | 1.457  | 7.821 | 12.21 | 2.10E-06 | 0.0001297 | 7.315 | <a href="#">144132</a>    | DNHD1             | dynein heavy chain domain 1                                     | <a href="#">ENSG00000179532</a>                    |
| A_23_P101480 | 0.6254 | 7.097 | 12.18 | 2.13E-06 | 0.000131  | 7.298 | <a href="#">22983</a>     | MAST1             | microtubule associated serine/threonine kinase 1                | <a href="#">ENSG00000105613</a>                    |
| A_23_P91802  | 0.7408 | 10.77 | 12.16 | 2.16E-06 | 0.0001312 | 7.286 | <a href="#">1890</a>      | TYMP              | thymidine phosphorylase                                         | <a href="#">ENSG00000025708</a>                    |

|              |        |       |       |          |           |       |                           |              |                                                                                               |                                                                    |
|--------------|--------|-------|-------|----------|-----------|-------|---------------------------|--------------|-----------------------------------------------------------------------------------------------|--------------------------------------------------------------------|
| A_24_P48983  | 0.9297 | 7.952 | 12.15 | 2.17E-06 | 0.0001314 | 7.281 | <a href="#">90060</a>     | CCDC120      | coiled-coil domain containing 120                                                             | <a href="#">ENSG00000147144</a>                                    |
| A_32_P83997  | 0.5591 | 11.31 | 12.15 | 2.17E-06 | 0.0001314 | 7.28  | <a href="#">10313</a>     | RTN3         | reticulum 3                                                                                   | <a href="#">ENSG00000133318</a>                                    |
| A_23_P167401 | 0.6775 | 7.638 | 12.14 | 2.18E-06 | 0.0001314 | 7.276 | <a href="#">56125</a>     | PCDHB11      | protocadherin beta 11                                                                         | <a href="#">ENSG00000197479</a>                                    |
| A_24_P718503 | 0.5983 | 8.076 | 12.14 | 2.18E-06 | 0.0001314 | 7.277 | <a href="#">100130152</a> | LOC100130152 | hypothetical protein LOC100130152                                                             | <a href="#">NA</a>                                                 |
| A_24_P450194 | 0.5489 | 6.055 | 12.13 | 2.21E-06 | 0.0001321 | 7.267 | <a href="#">400960</a>    | LOC400960    | hypothetical gene supported by BC040598                                                       | <a href="#">NA</a>                                                 |
| A_23_P97892  | 0.7491 | 7.817 | 12.12 | 2.22E-06 | 0.0001326 | 7.261 | <a href="#">8861</a>      | LDB1         | LIM domain binding 1                                                                          | <a href="#">ENSG00000198728</a>                                    |
| A_23_P40896  | 0.592  | 7.223 | 12.09 | 2.26E-06 | 0.0001339 | 7.241 | <a href="#">55186</a>     | SLC25A36     | solute carrier family 25 member 36                                                            | <a href="#">ENSG00000114120</a>                                    |
| A_24_P264790 | 2.058  | 9.898 | 12.08 | 2.28E-06 | 0.0001342 | 7.236 | <a href="#">4054</a>      | LTBP3        | latent transforming growth factor beta binding protein 3                                      | <a href="#">ENSG00000168056</a>                                    |
| A_32_P97798  | 0.5831 | 6.395 | 12.07 | 2.28E-06 | 0.0001344 | 7.233 | <a href="#">10628</a>     | TXNIP        | thioredoxin interacting protein                                                               | <a href="#">ENSG00000117289</a>                                    |
| A_24_P278602 | 0.9016 | 7.032 | 12.04 | 2.33E-06 | 0.0001363 | 7.214 | <a href="#">10068</a>     | IL18BP       | interleukin 18 binding protein                                                                | <a href="#">ENSG00000137496</a>                                    |
| A_23_P258570 | 0.4385 | 8.907 | 12.03 | 2.34E-06 | 0.0001365 | 7.211 | <a href="#">5716</a>      | PSMD10       | proteasome (prosome macropain) 26S subunit non-ATPase 10                                      | <a href="#">ENSG00000101843</a>                                    |
| A_23_P208900 | 0.541  | 6.9   | 12.02 | 2.36E-06 | 0.0001369 | 7.202 | <a href="#">10501</a>     | SEMA6B       | sema domain transmembrane domain (TM) and cytoplasmic domain (semaphorin) 6B                  | <a href="#">ENSG00000167680</a>                                    |
| A_32_P143336 | 0.7056 | 9.185 | 12    | 2.39E-06 | 0.0001375 | 7.189 | <a href="#">92249</a>     | LOC92249     | hypothetical LOC92249                                                                         | <a href="#">NA</a>                                                 |
| A_24_P187197 | 0.9936 | 7.177 | 11.96 | 2.44E-06 | 0.0001397 | 7.168 | <a href="#">440300</a>    | LOC440300    | chondroitin sulfate proteoglycan 4 pseudogene                                                 | <a href="#">NA</a>                                                 |
| A_32_P145764 | 0.8359 | 8.393 | 11.94 | 2.47E-06 | 0.000141  | 7.155 | <a href="#">730495</a>    | LOC730495    | hypothetical protein LOC730495                                                                | <a href="#">NA</a>                                                 |
| A_23_P39336  | 1.061  | 8.689 | 11.93 | 2.50E-06 | 0.000142  | 7.144 | <a href="#">23770</a>     | FKBP8        | FK506 binding protein 8 38kDa                                                                 | <a href="#">ENSG00000105701</a>                                    |
| A_23_P253389 | 0.8795 | 11.78 | 11.92 | 2.51E-06 | 0.000142  | 7.142 | <a href="#">6522</a>      | SLC4A2       | solute carrier family 4 anion exchanger member 2 (erythrocyte membrane protein band 3-like 1) | <a href="#">ENSG00000164889</a>                                    |
| A_23_P320290 | 0.6709 | 7.263 | 11.92 | 2.50E-06 | 0.000142  | 7.143 | <a href="#">152485</a>    | ZNF827       | zinc finger protein 827                                                                       | <a href="#">ENSG00000151612</a>                                    |
| A_24_P353709 | 0.6512 | 9.073 | 11.92 | 2.51E-06 | 0.0001421 | 7.139 | <a href="#">8704</a>      | B4GALT2      | UDP-Gal:betaGlcNAc beta 1 4-galactosyltransferase polypeptide 2                               | <a href="#">ENSG00000117411</a>                                    |
| A_32_P930375 | 0.8235 | 5.733 | 11.88 | 2.58E-06 | 0.000145  | 7.116 | <a href="#">619343</a>    | C8orf68      | chromosome 8 open reading frame 68                                                            | <a href="#">NA</a>                                                 |
| A_23_P105562 | 0.5069 | 6.333 | 11.86 | 2.60E-06 | 0.0001455 | 7.105 | <a href="#">7450</a>      | VWF          | von Willebrand factor                                                                         | <a href="#">ENSG00000110799</a>                                    |
| A_23_P344515 | 1.322  | 8.883 | 11.86 | 2.61E-06 | 0.0001455 | 7.105 | <a href="#">750</a>       | C16orf3      | chromosome 16 open reading frame 3                                                            | <a href="#">ENSG00000221819</a>                                    |
| A_23_P18993  | 0.5197 | 6.349 | 11.83 | 2.65E-06 | 0.0001472 | 7.087 | <a href="#">166968</a>    | MIER3        | mesoderm induction early response 1 family member 3                                           | <a href="#">ENSG00000155545</a>                                    |
| A_23_P97195  | 0.4503 | 8.295 | 11.83 | 2.65E-06 | 0.0001472 | 7.088 | <a href="#">56181</a>     | FAM54B       | family with sequence similarity 54 member B                                                   | <a href="#">ENSG00000117640</a>                                    |
| A_23_P71867  | 0.4593 | 7.444 | 11.81 | 2.69E-06 | 0.0001481 | 7.074 | <a href="#">3590</a>      | IL11RA       | interleukin 11 receptor alpha                                                                 | <a href="#">ENSG00000137070</a>                                    |
| A_23_P120513 | 0.8683 | 7.71  | 11.79 | 2.73E-06 | 0.0001495 | 7.06  | <a href="#">128653</a>    | C20orf141    | chromosome 20 open reading frame 141                                                          | <a href="#">ENSG00000198326</a><br><a href="#">ENSG00000241690</a> |
| A_24_P108401 | 0.6472 | 9.317 | 11.75 | 2.80E-06 | 0.0001518 | 7.036 | <a href="#">354</a>       | KLK3         | kallikrein-related peptidase 3                                                                | <a href="#">ENSG00000142515</a>                                    |
| A_23_P339191 | 0.5636 | 9.136 | 11.73 | 2.83E-06 | 0.0001528 | 7.024 | <a href="#">867</a>       | CBL          | Cas-Br-M (murine) ecotropic retroviral transforming sequence                                  | <a href="#">ENSG00000110395</a>                                    |
| A_24_P241862 | 1.25   | 9.255 | 11.73 | 2.83E-06 | 0.0001528 | 7.023 | <a href="#">8498</a>      | RANBP3       | RAN binding protein 3                                                                         | <a href="#">ENSG00000031823</a>                                    |
| A_23_P500824 | 0.8798 | 7.86  | 11.71 | 2.86E-06 | 0.0001536 | 7.013 | <a href="#">6853</a>      | SYN1         | synapsin I                                                                                    | <a href="#">ENSG00000008056</a>                                    |
| A_32_P159445 | 1.112  | 9.298 | 11.71 | 2.87E-06 | 0.0001536 | 7.011 | <a href="#">23096</a>     | IQSEC2       | IQ motif and Sec7 domain 2                                                                    | <a href="#">ENSG00000124313</a>                                    |
| A_24_P922808 | 0.6526 | 7.101 | 11.7  | 2.89E-06 | 0.0001542 | 7.002 | <a href="#">51029</a>     | PPPDE1       | PPPDE peptidase domain containing 1                                                           | <a href="#">ENSG00000121644</a>                                    |



|              |        |       |       |          |           |       |                        |          |                                                                               |                                 |
|--------------|--------|-------|-------|----------|-----------|-------|------------------------|----------|-------------------------------------------------------------------------------|---------------------------------|
| A_23_P142173 | 0.6401 | 6.571 | 11.69 | 2.90E-06 | 0.0001546 | 6.999 | <a href="#">9704</a>   | DHX34    | DEAH (Asp-Glu-Ala-His) box polypeptide 34                                     | <a href="#">ENSG00000134815</a> |
| A_23_P33573  | 0.5082 | 6.887 | 11.68 | 2.93E-06 | 0.0001554 | 6.991 | <a href="#">3850</a>   | KRT3     | keratin 3                                                                     | <a href="#">ENSG00000186442</a> |
| A_23_P142421 | 1.018  | 9.489 | 11.66 | 2.97E-06 | 0.0001567 | 6.977 | <a href="#">9757</a>   | MLL4     | myeloid/lymphoid or mixed-lineage leukemia 4                                  | <a href="#">ENSG00000105663</a> |
| A_32_P14187  | 1.217  | 7.43  | 11.66 | 2.97E-06 | 0.0001567 | 6.977 | <a href="#">7020</a>   | TFAP2A   | transcription factor AP-2 alpha (activating enhancer binding protein 2 alpha) | <a href="#">ENSG00000137203</a> |
| A_23_P88710  | 0.4864 | 10.13 | 11.65 | 2.98E-06 | 0.0001568 | 6.973 | <a href="#">25963</a>  | TMEM87A  | transmembrane protein 87A                                                     | <a href="#">ENSG00000103978</a> |
| A_24_P315535 | 0.8317 | 8.687 | 11.65 | 2.98E-06 | 0.0001567 | 6.975 | <a href="#">200734</a> | SPRED2   | sprouty-related EVH1 domain containing 2                                      | <a href="#">ENSG00000198369</a> |
| A_24_P384397 | 0.8101 | 8.882 | 11.65 | 2.98E-06 | 0.0001567 | 6.975 | <a href="#">125950</a> | RAVER1   | ribonucleoprotein PTB-binding 1                                               | <a href="#">ENSG00000161847</a> |
| A_23_P97652  | 0.9513 | 7.996 | 11.64 | 3.00E-06 | 0.0001576 | 6.966 | <a href="#">387509</a> | GPR153   | G protein-coupled receptor 153                                                | <a href="#">ENSG00000158292</a> |
| A_23_P164042 | 0.6334 | 6.632 | 11.61 | 3.06E-06 | 0.0001591 | 6.949 | <a href="#">2081</a>   | ERN1     | endoplasmic reticulum to nucleus signaling 1                                  | <a href="#">ENSG00000178607</a> |
| A_23_P129629 | 0.7149 | 7.184 | 11.6  | 3.08E-06 | 0.0001593 | 6.943 | <a href="#">4504</a>   | MT3      | metallothionein 3                                                             | <a href="#">ENSG00000087250</a> |
| A_23_P329727 | 2.244  | 9.265 | 11.6  | 3.07E-06 | 0.0001593 | 6.945 | <a href="#">23162</a>  | MAPK8IP3 | mitogen-activated protein kinase 8 interacting protein 3                      | <a href="#">ENSG00000138834</a> |
| A_23_P34554  | 0.9933 | 8.384 | 11.6  | 3.09E-06 | 0.0001596 | 6.939 | <a href="#">777</a>    | CACNA1E  | calcium channel voltage-dependent R type alpha 1E subunit                     | <a href="#">ENSG00000198216</a> |
| A_23_P87432  | 1.327  | 7.937 | 11.6  | 3.07E-06 | 0.0001593 | 6.945 | <a href="#">114822</a> | RHPN1    | rhopilin Rho GTPase binding protein 1                                         | <a href="#">ENSG00000158106</a> |
| A_23_P355471 | 0.961  | 7.373 | 11.59 | 3.10E-06 | 0.0001598 | 6.937 | <a href="#">6915</a>   | TBXA2R   | thromboxane A2 receptor                                                       | <a href="#">ENSG00000006638</a> |
| A_24_P352200 | 0.6489 | 6.736 | 11.59 | 3.10E-06 | 0.0001599 | 6.935 | <a href="#">79591</a>  | C10orf76 | chromosome 10 open reading frame 76                                           | <a href="#">ENSG00000120029</a> |
| A_24_P258235 | 0.6417 | 5.982 | 11.54 | 3.20E-06 | 0.0001639 | 6.903 | <a href="#">26338</a>  | OR5L2    | olfactory receptor family 5 subfamily L member 2                              | <a href="#">ENSG00000205030</a> |
| A_23_P16189  | 0.5161 | 5.956 | 11.53 | 3.23E-06 | 0.0001642 | 6.896 | <a href="#">5582</a>   | PRKCG    | protein kinase C gamma                                                        | <a href="#">ENSG00000126583</a> |
| A_23_P21570  | 1.215  | 9.7   | 11.51 | 3.26E-06 | 0.0001649 | 6.886 | <a href="#">64067</a>  | NPAS3    | neuronal PAS domain protein 3                                                 | <a href="#">ENSG00000151322</a> |
| A_32_P951    | 0.8391 | 7.784 | 11.51 | 3.26E-06 | 0.0001649 | 6.886 | <a href="#">280664</a> | WFDC10B  | WAP four-disulfide core domain 10B                                            | <a href="#">ENSG00000182931</a> |
| A_32_P41461  | 1.127  | 7.987 | 11.49 | 3.31E-06 | 0.0001664 | 6.872 | <a href="#">10163</a>  | WASF2    | WAS protein family member 2                                                   | <a href="#">ENSG00000158195</a> |
| A_23_P137157 | 0.7532 | 6.518 | 11.48 | 3.33E-06 | 0.0001669 | 6.864 | <a href="#">5973</a>   | RENBP    | renin binding protein                                                         | <a href="#">ENSG00000102032</a> |
| A_24_P392486 | 0.6476 | 11.85 | 11.48 | 3.32E-06 | 0.0001667 | 6.868 | <a href="#">339344</a> | MYPOP    | Myb-related transcription factor partner of profilin                          | <a href="#">ENSG00000176182</a> |
| A_23_P201940 | 0.6496 | 6.24  | 11.45 | 3.39E-06 | 0.000169  | 6.848 | <a href="#">25802</a>  | LMOD1    | leiomodrin 1 (smooth muscle)                                                  | <a href="#">ENSG00000163431</a> |
| A_23_P66948  | 0.4331 | 7.788 | 11.44 | 3.41E-06 | 0.0001692 | 6.842 | <a href="#">64762</a>  | FAM59A   | family with sequence similarity 59 member A                                   | <a href="#">ENSG00000141441</a> |
| A_24_P16856  | 0.8241 | 6.671 | 11.39 | 3.53E-06 | 0.0001727 | 6.808 | <a href="#">8227</a>   | SFRS17A  | splicing factor arginine/serine-rich 17A                                      | <a href="#">ENSG00000197976</a> |
| A_32_P139738 | 1.034  | 7.721 | 11.39 | 3.53E-06 | 0.0001728 | 6.807 | <a href="#">440362</a> | HERC2P4  | hect domain and RLD 2 pseudogene 4                                            | <a href="#">NA</a>              |
| A_23_P167537 | 0.7161 | 7.701 | 11.33 | 3.68E-06 | 0.0001782 | 6.767 | <a href="#">10814</a>  | CPLX2    | complexin 2                                                                   | <a href="#">ENSG00000145920</a> |
| A_23_P69206  | 0.4004 | 6.435 | 11.32 | 3.70E-06 | 0.0001787 | 6.761 | <a href="#">6533</a>   | SLC6A6   | solute carrier family 6 (neurotransmitter transporter taurine) member 6       | <a href="#">ENSG00000131389</a> |
| A_24_P375728 | 1.005  | 7.711 | 11.32 | 3.71E-06 | 0.0001787 | 6.76  | <a href="#">92154</a>  | MTSS1L   | metastasis suppressor 1-like                                                  | <a href="#">ENSG00000132613</a> |
| A_23_P317796 | 1.081  | 8.528 | 11.27 | 3.81E-06 | 0.0001826 | 6.733 | <a href="#">346606</a> | MOGAT3   | monoacylglycerol O-acyltransferase 3                                          | <a href="#">ENSG00000106384</a> |
| A_23_P80473  | 0.6971 | 8.222 | 11.17 | 4.09E-06 | 0.0001904 | 6.663 | <a href="#">166012</a> | CHST13   | carbohydrate (chondroitin 4) sulfotransferase 13                              | <a href="#">ENSG00000180767</a> |
| A_24_P235098 | 0.8435 | 9.396 | 11.16 | 4.11E-06 | 0.0001908 | 6.658 | <a href="#">94234</a>  | FOXQ1    | forkhead box Q1                                                               | <a href="#">ENSG00000164379</a> |
| A_23_P107394 | 0.9714 | 10.15 | 11.14 | 4.17E-06 | 0.0001917 | 6.645 | <a href="#">84667</a>  | HES7     | hairly and enhancer of split 7 (Drosophila)                                   | <a href="#">ENSG00000179111</a> |

|              |        |       |       |          |           |       |                           |              |                                                                                |                                 |
|--------------|--------|-------|-------|----------|-----------|-------|---------------------------|--------------|--------------------------------------------------------------------------------|---------------------------------|
| A_24_P143599 | 0.6626 | 7.262 | 11.14 | 4.16E-06 | 0.0001917 | 6.647 | <a href="#">23250</a>     | ATP11A       | ATPase class VI type 11A                                                       | <a href="#">ENSG00000068650</a> |
| A_23_P113682 | 0.8143 | 7.651 | 11.1  | 4.28E-06 | 0.0001944 | 6.618 | <a href="#">142680</a>    | SLC34A3      | solute carrier family 34 (sodium phosphate) member 3                           | <a href="#">ENSG00000198569</a> |
| A_32_P143980 | 1.006  | 8.423 | 11.1  | 4.29E-06 | 0.0001946 | 6.616 | <a href="#">3106</a>      | HLA-B        | major histocompatibility complex class I B                                     | <a href="#">ENSG00000234745</a> |
| A_32_P200165 | 0.7393 | 6.245 | 11.1  | 4.29E-06 | 0.0001946 | 6.615 | <a href="#">1994</a>      | ELAVL1       | ELAV (embryonic lethal abnormal vision Drosophila)-like 1 (Hu antigen R)       | <a href="#">ENSG00000066044</a> |
| A_23_P213216 | 1.497  | 10.28 | 11.09 | 4.33E-06 | 0.0001953 | 6.608 | <a href="#">7469</a>      | WHSC2        | Wolf-Hirschhorn syndrome candidate 2                                           | <a href="#">ENSG00000185049</a> |
| A_23_P102622 | 0.6708 | 7.048 | 11.08 | 4.33E-06 | 0.0001953 | 6.607 | <a href="#">8785</a>      | MATN4        | matrilin 4                                                                     | <a href="#">ENSG00000124159</a> |
| A_23_P26294  | 0.8204 | 12.64 | 11.08 | 4.33E-06 | 0.0001954 | 6.606 | <a href="#">25823</a>     | TPSG1        | trypsin gamma 1                                                                | <a href="#">ENSG00000116176</a> |
| A_24_P269101 | 0.6215 | 6.95  | 11.06 | 4.40E-06 | 0.0001967 | 6.592 | <a href="#">4762</a>      | NEUROG1      | neurogenin 1                                                                   | <a href="#">ENSG00000181965</a> |
| A_23_P109122 | 1.131  | 8.183 | 11.05 | 4.44E-06 | 0.0001979 | 6.582 | <a href="#">57593</a>     | EBF4         | early B-cell factor 4                                                          | <a href="#">ENSG00000088881</a> |
| A_23_P25790  | 0.5582 | 10.81 | 11.04 | 4.47E-06 | 0.0001986 | 6.576 | <a href="#">64403</a>     | CDH24        | cadherin 24 type 2                                                             | <a href="#">ENSG00000139880</a> |
| A_23_P253405 | 0.6267 | 9.088 | 11.01 | 4.54E-06 | 0.0002005 | 6.561 | <a href="#">1317</a>      | SLC31A1      | solute carrier family 31 (copper transporters) member 1                        | <a href="#">ENSG00000136868</a> |
| A_23_P217068 | 0.4381 | 15.07 | 11    | 4.59E-06 | 0.0002017 | 6.549 | <a href="#">6136</a>      | RPL12        | ribosomal protein L12                                                          | <a href="#">ENSG00000197958</a> |
| A_23_P35148  | 0.6442 | 7.842 | 10.99 | 4.61E-06 | 0.000202  | 6.546 | <a href="#">6884</a>      | TAF13        | TAF13 RNA polymerase II TATA box binding protein (TBP)-associated factor 18kDa | <a href="#">ENSG00000197780</a> |
| A_23_P122815 | 0.4614 | 11.21 | 10.98 | 4.65E-06 | 0.000203  | 6.537 | <a href="#">813</a>       | CALU         | calumenin                                                                      | <a href="#">ENSG00000128595</a> |
| A_24_P287780 | 0.6391 | 7.353 | 10.97 | 4.69E-06 | 0.0002041 | 6.528 | <a href="#">5119</a>      | CHMP1A       | chromatin modifying protein 1A                                                 | <a href="#">ENSG00000131165</a> |
| A_23_P254970 | 0.7476 | 6.728 | 10.96 | 4.72E-06 | 0.0002046 | 6.522 | <a href="#">55599</a>     | RNPC3        | RNA-binding region (RNP1 RRM) containing 3                                     | <a href="#">ENSG00000185946</a> |
| A_23_P119395 | 0.8955 | 7.928 | 10.95 | 4.74E-06 | 0.0002049 | 6.518 | <a href="#">2696</a>      | GIPR         | gastric inhibitory polypeptide receptor                                        | <a href="#">ENSG00000010310</a> |
| A_23_P153549 | 1.14   | 8.72  | 10.91 | 4.88E-06 | 0.0002087 | 6.489 | <a href="#">2906</a>      | GRIN2D       | glutamate receptor ionotropic N-methyl D-aspartate 2D                          | <a href="#">ENSG00000105464</a> |
| A_32_P216841 | 0.7921 | 7.149 | 10.9  | 4.90E-06 | 0.0002093 | 6.484 | <a href="#">132671</a>    | SPATA18      | spermatogenesis associated 18 homolog (rat)                                    | <a href="#">ENSG00000163071</a> |
| A_23_P11309  | 1.586  | 8.55  | 10.88 | 4.97E-06 | 0.0002119 | 6.47  | <a href="#">55558</a>     | PLXNA3       | plexin A3                                                                      | <a href="#">ENSG00000130827</a> |
| A_24_P848662 | 0.6888 | 7.871 | 10.87 | 5.01E-06 | 0.0002132 | 6.462 | <a href="#">100131582</a> | LOC100131582 | hypothetical protein LOC100131582                                              | <a href="#">NA</a>              |
| A_23_P428738 | 0.9673 | 8.125 | 10.85 | 5.06E-06 | 0.0002139 | 6.453 | <a href="#">283</a>       | ANG          | angiogenin ribonuclease RNase A family 5                                       | <a href="#">ENSG00000214274</a> |
| A_23_P434289 | 1.374  | 7.807 | 10.85 | 5.09E-06 | 0.0002142 | 6.448 | <a href="#">118442</a>    | GPR62        | G protein-coupled receptor 62                                                  | <a href="#">ENSG00000180929</a> |
| A_24_P203315 | 0.6657 | 5.993 | 10.85 | 5.08E-06 | 0.0002142 | 6.449 | <a href="#">254263</a>    | CNIH2        | cornichon homolog 2 (Drosophila)                                               | <a href="#">ENSG00000174871</a> |
| A_24_P315066 | 1.139  | 8.308 | 10.84 | 5.10E-06 | 0.0002145 | 6.445 | <a href="#">83637</a>     | ZMIZ2        | zinc finger MIZ-type containing 2                                              | <a href="#">ENSG00000122515</a> |
| A_23_P165186 | 0.637  | 8.307 | 10.82 | 5.17E-06 | 0.0002161 | 6.431 | <a href="#">55957</a>     | LIN37        | lin-37 homolog (C. elegans)                                                    | <a href="#">ENSG00000188223</a> |
| A_24_P24244  | 1.01   | 8.705 | 10.82 | 5.20E-06 | 0.0002169 | 6.426 | <a href="#">1822</a>      | ATN1         | atrophin 1                                                                     | <a href="#">ENSG00000111676</a> |
| A_32_P735636 | 0.5896 | 6.666 | 10.81 | 5.20E-06 | 0.000217  | 6.425 | <a href="#">55739</a>     | CARKD        | carbohydrate kinase domain containing                                          | <a href="#">ENSG00000213995</a> |
| A_24_P935804 | 0.5056 | 5.965 | 10.8  | 5.26E-06 | 0.000219  | 6.414 | <a href="#">285331</a>    | CCDC66       | coiled-coil domain containing 66                                               | <a href="#">ENSG00000180376</a> |
| A_24_P372833 | 0.6385 | 6.13  | 10.79 | 5.29E-06 | 0.0002193 | 6.409 | <a href="#">9651</a>      | PLCH2        | phospholipase C eta 2                                                          | <a href="#">ENSG00000149527</a> |
| A_32_P74615  | 0.876  | 7.18  | 10.79 | 5.29E-06 | 0.0002193 | 6.409 | <a href="#">389058</a>    | SP5          | Sp5 transcription factor                                                       | <a href="#">ENSG00000204335</a> |
| A_23_P306148 | 0.9194 | 10.69 | 10.69 | 5.67E-06 | 0.0002293 | 6.34  | <a href="#">5371</a>      | PML          | promyelocytic leukemia                                                         | <a href="#">ENSG00000140464</a> |
| A_23_P98402  | 0.3802 | 10.02 | 10.67 | 5.76E-06 | 0.0002309 | 6.324 | <a href="#">51092</a>     | SIDT2        | SID1 transmembrane family member 2                                             | <a href="#">ENSG00000149577</a> |
| A_24_P349676 | 1.046  | 7.988 | 10.67 | 5.75E-06 | 0.0002309 | 6.325 | <a href="#">55663</a>     | ZNF446       | zinc finger protein 446                                                        | <a href="#">ENSG00000083838</a> |

|              |        |       |       |          |           |       |                           |              |                                                                                 |                                 |
|--------------|--------|-------|-------|----------|-----------|-------|---------------------------|--------------|---------------------------------------------------------------------------------|---------------------------------|
| A_24_P586390 | 0.8012 | 8.712 | 10.67 | 5.74E-06 | 0.0002306 | 6.328 | <a href="#">441124</a>    | LOC441124    | hypothetical gene supported by AK093729; BX647918                               | <a href="#">NA</a>              |
| A_24_P286527 | 1.055  | 8.844 | 10.66 | 5.80E-06 | 0.0002317 | 6.317 | <a href="#">64792</a>     | RABL5        | RAB member RAS oncogene family-like 5                                           | <a href="#">ENSG00000128581</a> |
| A_24_P311771 | 0.8407 | 8.167 | 10.66 | 5.78E-06 | 0.0002311 | 6.321 | <a href="#">51663</a>     | ZFR          | zinc finger RNA binding protein                                                 | <a href="#">ENSG00000056097</a> |
| A_32_P834166 | 0.5628 | 6.457 | 10.65 | 5.81E-06 | 0.0002318 | 6.316 | <a href="#">100128843</a> | LOC100128843 | similar to DNA polymerase epsilon catalytic subunit protein                     | <a href="#">ENSG00000233881</a> |
| A_24_P386334 | 1.652  | 9.87  | 10.64 | 5.87E-06 | 0.000233  | 6.306 | <a href="#">56904</a>     | SH3GLB2      | SH3-domain GRB2-like endophilin B2                                              | <a href="#">ENSG00000148341</a> |
| A_32_P26092  | 0.453  | 6.02  | 10.64 | 5.86E-06 | 0.0002328 | 6.308 | <a href="#">7293</a>      | TNFRSF4      | tumor necrosis factor receptor superfamily member 4                             | <a href="#">ENSG00000186827</a> |
| A_23_P153351 | 0.4368 | 11.87 | 10.62 | 5.95E-06 | 0.0002354 | 6.291 | <a href="#">645</a>       | BLVRB        | biliverdin reductase B (flavin reductase (NADPH))                               | <a href="#">ENSG00000090013</a> |
| A_24_P918387 | 0.808  | 6.483 | 10.62 | 5.94E-06 | 0.0002352 | 6.293 | <a href="#">5426</a>      | POLE         | polymerase (DNA directed) epsilon                                               | <a href="#">ENSG00000177084</a> |
| A_24_P922909 | 0.9973 | 7.839 | 10.62 | 5.94E-06 | 0.0002351 | 6.294 | <a href="#">4297</a>      | MLL          | myeloid/lymphoid or mixed-lineage leukemia (trithorax homolog Drosophila)       | <a href="#">ENSG00000118058</a> |
| A_23_P34888  | 1.09   | 7.318 | 10.61 | 6.00E-06 | 0.0002362 | 6.283 | <a href="#">27159</a>     | CHIA         | chitinase acidic                                                                | <a href="#">ENSG00000134216</a> |
| A_24_P328446 | 1.764  | 7.617 | 10.61 | 6.00E-06 | 0.0002362 | 6.284 | <a href="#">3196</a>      | TLX2         | T-cell leukemia homeobox 2                                                      | <a href="#">ENSG00000115297</a> |
| A_23_P218434 | 0.971  | 9.05  | 10.6  | 6.03E-06 | 0.0002365 | 6.279 | <a href="#">7769</a>      | ZNF226       | zinc finger protein 226                                                         | <a href="#">ENSG00000167380</a> |
| A_24_P311856 | 0.6041 | 6.317 | 10.6  | 6.03E-06 | 0.0002365 | 6.278 | <a href="#">1297</a>      | COL9A1       | collagen type IX alpha 1                                                        | <a href="#">ENSG00000112280</a> |
| A_23_P74668  | 1.035  | 8.027 | 10.58 | 6.11E-06 | 0.0002383 | 6.265 | <a href="#">93190</a>     | C1orf158     | chromosome 1 open reading frame 158                                             | <a href="#">ENSG00000157330</a> |
| A_23_P329016 | 1.064  | 10.03 | 10.57 | 6.18E-06 | 0.0002403 | 6.254 | <a href="#">92715</a>     | WDR85        | WD repeat domain 85                                                             | <a href="#">ENSG00000148399</a> |
| A_24_P324577 | 1.15   | 7.714 | 10.57 | 6.15E-06 | 0.0002396 | 6.258 | <a href="#">57612</a>     | KIAA1466     | KIAA1466 gene                                                                   | <a href="#">NA</a>              |
| A_23_P111797 | 0.5024 | 8.282 | 10.56 | 6.22E-06 | 0.000241  | 6.247 | <a href="#">84214</a>     | DKFZp434F142 | hypothetical DKFZp434F142                                                       | <a href="#">NA</a>              |
| A_23_P369983 | 0.667  | 8.918 | 10.56 | 6.20E-06 | 0.0002405 | 6.251 | <a href="#">147965</a>    | FAM98C       | family with sequence similarity 98 member C                                     | <a href="#">ENSG00000130244</a> |
| A_32_P175349 | 0.7227 | 7.31  | 10.55 | 6.27E-06 | 0.0002415 | 6.24  | <a href="#">100128942</a> | LOC100128942 | hypothetical protein LOC100128942                                               | <a href="#">ENSG00000204277</a> |
| A_24_P202978 | 0.6106 | 8.915 | 10.54 | 6.28E-06 | 0.0002417 | 6.237 | <a href="#">8897</a>      | MTMR3        | myotubularin related protein 3                                                  | <a href="#">ENSG00000100330</a> |
| A_24_P929754 | 0.8131 | 8.631 | 10.54 | 6.30E-06 | 0.0002417 | 6.235 | <a href="#">2872</a>      | MKNK2        | MAP kinase interacting serine/threonine kinase 2                                | <a href="#">ENSG00000099875</a> |
| A_23_P320095 | 0.8303 | 7.745 | 10.5  | 6.48E-06 | 0.0002472 | 6.207 | <a href="#">27254</a>     | CSDC2        | cold shock domain containing C2 RNA binding                                     | <a href="#">ENSG00000172346</a> |
| A_24_P416595 | 0.9935 | 7.686 | 10.5  | 6.49E-06 | 0.0002474 | 6.205 | <a href="#">284346</a>    | ZNF575       | zinc finger protein 575                                                         | <a href="#">ENSG00000176472</a> |
| A_23_P142037 | 0.9805 | 6.726 | 10.48 | 6.58E-06 | 0.0002493 | 6.192 | <a href="#">5989</a>      | RFX1         | regulatory factor X 1 (influences HLA class II expression)                      | <a href="#">ENSG00000132005</a> |
| A_24_P229350 | 0.4655 | 7.206 | 10.48 | 6.58E-06 | 0.0002493 | 6.191 | <a href="#">91010</a>     | FMNL3        | formin-like 3                                                                   | <a href="#">ENSG00000161791</a> |
| A_24_P285378 | 1.314  | 8.401 | 10.48 | 6.55E-06 | 0.0002489 | 6.197 | <a href="#">56063</a>     | C1orf91      | chromosome 1 open reading frame 91                                              | <a href="#">ENSG00000160055</a> |
| A_24_P400528 | 2.114  | 7.661 | 10.48 | 6.58E-06 | 0.0002493 | 6.191 | <a href="#">84629</a>     | TNRC18       | trinucleotide repeat containing 18                                              | <a href="#">ENSG00000182095</a> |
| A_24_P206121 | 1.314  | 9.1   | 10.47 | 6.60E-06 | 0.0002494 | 6.189 | <a href="#">3779</a>      | KCNMB1       | potassium large conductance calcium-activated channel subfamily M beta member 1 | <a href="#">ENSG00000145936</a> |
| A_23_P34877  | 0.4504 | 7.943 | 10.46 | 6.66E-06 | 0.0002506 | 6.179 | <a href="#">64783</a>     | RBM15        | RNA binding motif protein 15                                                    | <a href="#">ENSG00000162775</a> |
| A_23_P91278  | 0.5779 | 6.922 | 10.46 | 6.68E-06 | 0.0002507 | 6.177 | <a href="#">4773</a>      | NFATC2       | nuclear factor of activated T-cells cytoplasmic calcineurin-dependent 2         | <a href="#">ENSG00000101096</a> |
| A_23_P125772 | 0.5758 | 6.871 | 10.41 | 6.93E-06 | 0.0002579 | 6.14  | <a href="#">26576</a>     | SRPK3        | SFRS protein kinase 3                                                           | <a href="#">ENSG00000184343</a> |

|              |        |       |       |          |           |       |                           |              |                                                                      |                                                                                                                                                                             |
|--------------|--------|-------|-------|----------|-----------|-------|---------------------------|--------------|----------------------------------------------------------------------|-----------------------------------------------------------------------------------------------------------------------------------------------------------------------------|
| A_24_P16036  | 0.3525 | 9.032 | 10.4  | 6.96E-06 | 0.0002583 | 6.136 | <a href="#">391356</a>    | C2orf79      | chromosome 2 open reading frame 79                                   | <a href="#">ENSG00000184924</a>                                                                                                                                             |
| A_24_P933688 | 2.11   | 7.18  | 10.39 | 7.00E-06 | 0.000259  | 6.13  | <a href="#">89797</a>     | NAV2         | neuron navigator 2                                                   | <a href="#">ENSG00000166833</a>                                                                                                                                             |
| A_32_P206839 | 0.5839 | 8.158 | 10.39 | 7.02E-06 | 0.0002597 | 6.126 | <a href="#">100288911</a> | LOC100288911 | hypothetical protein LOC100288911                                    | <a href="#">NA</a>                                                                                                                                                          |
| A_23_P120435 | 1.189  | 9.558 | 10.37 | 7.12E-06 | 0.0002611 | 6.112 | <a href="#">140686</a>    | WFDC3        | WAP four-disulfide core domain 3                                     | <a href="#">ENSG00000124116</a>                                                                                                                                             |
| A_23_P257407 | 0.5847 | 11.51 | 10.37 | 7.11E-06 | 0.0002608 | 6.114 | <a href="#">27158</a>     | NDOR1        | NADPH dependent diflavin oxidoreductase 1                            | <a href="#">ENSG00000188566</a>                                                                                                                                             |
| A_23_P94133  | 0.7802 | 7.915 | 10.36 | 7.15E-06 | 0.0002614 | 6.108 | <a href="#">10940</a>     | POP1         | processing of precursor 1 ribonuclease P/MRP subunit (S. cerevisiae) | <a href="#">ENSG00000104356</a>                                                                                                                                             |
| A_24_P923765 | 1.047  | 9.794 | 10.36 | 7.14E-06 | 0.0002611 | 6.11  | <a href="#">399664</a>    | MEX3D        | mex-3 homolog D (C. elegans)                                         | <a href="#">ENSG00000181588</a>                                                                                                                                             |
| A_23_P131139 | 0.364  | 6.569 | 10.35 | 7.23E-06 | 0.0002633 | 6.097 | <a href="#">116093</a>    | DIRC1        | disrupted in renal carcinoma 1                                       | <a href="#">ENSG00000174325</a>                                                                                                                                             |
| A_32_P157228 | 0.4169 | 7.774 | 10.35 | 7.20E-06 | 0.0002627 | 6.101 | <a href="#">25909</a>     | AHCTF1       | AT hook containing transcription factor 1                            | <a href="#">ENSG00000153207</a>                                                                                                                                             |
| A_24_P202329 | 0.7515 | 6.652 | 10.34 | 7.28E-06 | 0.0002644 | 6.091 | <a href="#">146880</a>    | LOC146880    | hypothetical LOC146880                                               | <a href="#">NA</a>                                                                                                                                                          |
| A_32_P168670 | 0.8286 | 6.342 | 10.34 | 7.26E-06 | 0.0002641 | 6.093 | <a href="#">55016</a>     | 1-Mar        | membrane-associated ring finger (C3HC4) 1                            | <a href="#">ENSG00000145416</a>                                                                                                                                             |
| A_23_P15101  | 0.5781 | 8.543 | 10.31 | 7.41E-06 | 0.0002675 | 6.073 | <a href="#">79838</a>     | TMC5         | transmembrane channel-like 5                                         | <a href="#">ENSG00000103534</a>                                                                                                                                             |
| A_23_P53724  | 0.8895 | 7.048 | 10.31 | 7.40E-06 | 0.0002675 | 6.074 | <a href="#">9746</a>      | CLSTN3       | calsyntenin 3                                                        | <a href="#">ENSG00000139182</a>                                                                                                                                             |
| A_24_P295999 | 0.5127 | 8.543 | 10.26 | 7.66E-06 | 0.0002725 | 6.039 | <a href="#">920</a>       | CD4          | CD4 molecule                                                         | <a href="#">ENSG0000010610</a>                                                                                                                                              |
| A_23_P353704 | 0.9581 | 9.121 | 10.24 | 7.81E-06 | 0.0002758 | 6.02  | <a href="#">56261</a>     | GPCPD1       | glycerophosphocholine phosphodiesterase GDE1 homolog (S. cerevisiae) | <a href="#">ENSG00000125772</a>                                                                                                                                             |
| A_24_P315500 | 1.06   | 8.144 | 10.24 | 7.78E-06 | 0.0002754 | 6.024 | <a href="#">100130557</a> | LOC100130557 | hypothetical LOC100130557                                            | <a href="#">NA</a>                                                                                                                                                          |
| A_24_P368943 | 0.678  | 7.775 | 10.24 | 7.78E-06 | 0.0002754 | 6.024 | <a href="#">2128</a>      | EVX1         | even-skipped homeobox 1                                              | <a href="#">ENSG00000106038</a>                                                                                                                                             |
| A_24_P382579 | 0.4908 | 6.735 | 10.24 | 7.78E-06 | 0.0002754 | 6.024 | <a href="#">5020</a>      | OXT          | oxytocin prepropeptide                                               | <a href="#">ENSG00000101405</a>                                                                                                                                             |
| A_23_P303891 | 0.7267 | 8.407 | 10.23 | 7.88E-06 | 0.0002774 | 6.011 | <a href="#">353133</a>    | LCE1C        | late cornified envelope 1C                                           | <a href="#">ENSG00000197084</a>                                                                                                                                             |
| A_24_P85365  | 1.02   | 7.06  | 10.19 | 8.10E-06 | 0.0002832 | 5.984 | <a href="#">8509</a>      | NDST2        | N-deacetylase/N-sulfotransferase (heparan glucosaminyl) 2            | <a href="#">ENSG00000166507</a>                                                                                                                                             |
| A_23_P34402  | 0.6922 | 9.763 | 10.18 | 8.15E-06 | 0.0002845 | 5.977 | <a href="#">23385</a>     | NCSTN        | nicastrin                                                            | <a href="#">ENSG00000162736</a>                                                                                                                                             |
| A_24_P161036 | 0.4063 | 10.02 | 10.18 | 8.15E-06 | 0.0002845 | 5.977 | <a href="#">641371</a>    | ACOT1        | acyl-CoA thioesterase 1                                              | <a href="#">ENSG00000184227</a>                                                                                                                                             |
| A_24_P112803 | 0.9979 | 7.931 | 10.17 | 8.19E-06 | 0.0002846 | 5.972 | <a href="#">6656</a>      | SOX1         | SRY (sex determining region Y)-box 1                                 | <a href="#">ENSG00000182968</a>                                                                                                                                             |
| A_24_P213503 | 0.6637 | 7.778 | 10.17 | 8.18E-06 | 0.0002846 | 5.974 | <a href="#">5791</a>      | PTPRE        | protein tyrosine phosphatase receptor type E                         | <a href="#">ENSG00000132334</a>                                                                                                                                             |
| A_32_P64038  | 0.7442 | 10.55 | 10.17 | 8.19E-06 | 0.0002846 | 5.972 | <a href="#">400590</a>    | LOC400590    | hypothetical LOC400590                                               | <a href="#">NA</a>                                                                                                                                                          |
| A_23_P422071 | 0.4766 | 9.279 | 10.15 | 8.30E-06 | 0.0002877 | 5.959 | <a href="#">8705</a>      | B3GALT4      | UDP-Gal:betaGlcNAc beta 1-3-galactosyltransferase polypeptide 4      | <a href="#">ENSG00000206285</a><br><a href="#">ENSG00000226936</a><br><a href="#">ENSG00000235155</a><br><a href="#">ENSG00000235863</a><br><a href="#">ENSG00000236802</a> |
| A_24_P221385 | 0.8467 | 8.937 | 10.12 | 8.51E-06 | 0.000293  | 5.934 | <a href="#">84288</a>     | EFCAB2       | EF-hand calcium binding domain 2                                     | <a href="#">ENSG00000203666</a>                                                                                                                                             |
| A_23_P318486 | 0.9234 | 8.239 | 10.07 | 8.80E-06 | 0.0003001 | 5.9   | <a href="#">219293</a>    | ATAD3C       | ATPase family AAA domain containing 3C                               | <a href="#">ENSG00000215915</a>                                                                                                                                             |
| A_24_P933180 | 0.6113 | 7.117 | 10.07 | 8.86E-06 | 0.0003015 | 5.894 | <a href="#">2677</a>      | GGCX         | gamma-glutamyl carboxylase                                           | <a href="#">ENSG00000115486</a>                                                                                                                                             |
| A_23_P210379 | 0.5364 | 12.22 | 10.06 | 8.89E-06 | 0.0003018 | 5.89  | <a href="#">55738</a>     | ARFGAP1      | ADP-ribosylation factor GTPase activating protein 1                  | <a href="#">ENSG00000101199</a>                                                                                                                                             |
| A_24_P218056 | 1.002  | 7.701 | 10.05 | 8.94E-06 | 0.0003032 | 5.884 | <a href="#">23386</a>     | NUDCD3       | NudC domain containing 3                                             | <a href="#">ENSG0000015676</a>                                                                                                                                              |

|              |         |       |        |          |           |       |                        |           |                                                                              |                                                                                                       |
|--------------|---------|-------|--------|----------|-----------|-------|------------------------|-----------|------------------------------------------------------------------------------|-------------------------------------------------------------------------------------------------------|
| A_23_P303390 | 0.3282  | 6.263 | 10.04  | 9.03E-06 | 0.0003054 | 5.874 | <a href="#">4613</a>   | MYCN      | v-myc myelocytomatosis viral related oncogene neuroblastoma derived (avian)  | <a href="#">ENSG00000134323</a>                                                                       |
| A_24_P256243 | 1.006   | 7.44  | 10.03  | 9.10E-06 | 0.0003073 | 5.867 | <a href="#">6757</a>   | SSX2      | synovial sarcoma X breakpoint 2                                              | <a href="#">ENSG00000157950</a><br><a href="#">ENSG00000187754</a><br><a href="#">ENSG00000241476</a> |
| A_23_P41634  | 0.7279  | 8.381 | 10.02  | 9.18E-06 | 0.0003087 | 5.858 | <a href="#">57763</a>  | ANKRA2    | ankyrin repeat family A (RFXANK-like) 2                                      | <a href="#">ENSG00000164331</a>                                                                       |
| A_23_P259580 | 1.547   | 9.475 | 10.01  | 9.23E-06 | 0.0003096 | 5.852 | <a href="#">6892</a>   | TAPBP     | TAP binding protein (tapasin)                                                | <a href="#">ENSG00000206208</a><br><a href="#">ENSG00000231925</a>                                    |
| A_23_P432545 | 0.7041  | 7.83  | 10.01  | 9.23E-06 | 0.0003096 | 5.852 | <a href="#">283229</a> | EFCAB4A   | EF-hand calcium binding domain 4A                                            | <a href="#">ENSG00000177685</a>                                                                       |
| A_23_P76529  | 0.8136  | 7.934 | 10     | 9.28E-06 | 0.0003102 | 5.847 | <a href="#">3695</a>   | ITGB7     | integrin beta 7                                                              | <a href="#">ENSG00000139626</a>                                                                       |
| A_24_P348989 | 0.7364  | 6.411 | 10     | 9.29E-06 | 0.0003102 | 5.846 | <a href="#">11024</a>  | LILRA1    | leukocyte immunoglobulin-like receptor subfamily A (with TM domain) member 1 | <a href="#">ENSG00000104974</a>                                                                       |
| A_23_P373031 | 1.138   | 7.902 | 9.981  | 9.42E-06 | 0.0003128 | 5.831 | <a href="#">775</a>    | CACNA1C   | calcium channel voltage-dependent L type alpha 1C subunit                    | <a href="#">ENSG00000151067</a>                                                                       |
| A_24_P367812 | 0.4446  | 6.959 | 9.977  | 9.46E-06 | 0.0003132 | 5.828 | <a href="#">650392</a> | LOC650392 | hypothetical protein LOC650392                                               | <a href="#">NA</a>                                                                                    |
| A_23_P85441  | 0.4606  | 7.191 | 9.967  | 9.52E-06 | 0.0003145 | 5.821 | <a href="#">57549</a>  | IGSF9     | immunoglobulin superfamily member 9                                          | <a href="#">ENSG00000085552</a>                                                                       |
| A_23_P71778  | 1.482   | 9.03  | 9.963  | 9.56E-06 | 0.0003154 | 5.818 | <a href="#">389812</a> | LCN15     | lipocalin 15                                                                 | <a href="#">ENSG00000177984</a>                                                                       |
| A_24_P319635 | 0.7845  | 9.864 | 9.954  | 9.62E-06 | 0.0003167 | 5.811 | <a href="#">4170</a>   | MCL1      | myeloid cell leukemia sequence 1 (BCL2-related)                              | <a href="#">ENSG00000143384</a>                                                                       |
| A_32_P311737 | 1.136   | 7.799 | 9.953  | 9.62E-06 | 0.0003167 | 5.811 | <a href="#">26030</a>  | PLEKHG3   | pleckstrin homology domain containing family G (with RhoGef domain) member 3 | <a href="#">ENSG00000126822</a>                                                                       |
| A_32_P194032 | 1.067   | 9.121 | 9.946  | 9.67E-06 | 0.0003178 | 5.805 | <a href="#">91694</a>  | LONRF1    | LON peptidase N-terminal domain and ring finger 1                            | <a href="#">ENSG00000154359</a>                                                                       |
| A_23_P19036  | 0.6731  | 10.07 | 9.945  | 9.68E-06 | 0.0003178 | 5.804 | <a href="#">10318</a>  | TNIP1     | TNFAIP3 interacting protein 1                                                | <a href="#">ENSG00000145901</a>                                                                       |
| A_23_P431734 | 1.11    | 7.415 | 9.942  | 9.70E-06 | 0.0003178 | 5.802 | <a href="#">51312</a>  | SLC25A37  | solute carrier family 25 member 37                                           | <a href="#">ENSG00000147454</a>                                                                       |
| A_24_P612446 | -0.7424 | 6.069 | -9.941 | 9.71E-06 | 0.0003179 | 5.801 | <a href="#">221477</a> | C6orf89   | chromosome 6 open reading frame 89                                           | <a href="#">ENSG00000198663</a>                                                                       |
| A_23_P165548 | -1.058  | 7.521 | -9.943 | 9.69E-06 | 0.0003178 | 5.803 | <a href="#">64342</a>  | HS1BP3    | HCLS1 binding protein 3                                                      | <a href="#">ENSG00000118960</a>                                                                       |
| A_23_P428373 | -0.9436 | 6.024 | -9.949 | 9.65E-06 | 0.0003174 | 5.807 | <a href="#">254958</a> | REXO1L1   | REX1 RNA exonuclease 1 homolog (S. cerevisiae)-like 1                        | <a href="#">ENSG00000205176</a>                                                                       |
| A_23_P256021 | -0.8486 | 12.45 | -9.953 | 9.62E-06 | 0.0003167 | 5.81  | <a href="#">81887</a>  | LAS1L     | LAS1-like (S. cerevisiae)                                                    | <a href="#">ENSG00000001497</a>                                                                       |
| A_24_P277576 | -0.3803 | 5.773 | -9.968 | 9.51E-06 | 0.0003145 | 5.822 | <a href="#">9319</a>   | TRIP13    | thyroid hormone receptor interactor 13                                       | <a href="#">ENSG00000071539</a>                                                                       |
| A_23_P365149 | -1.066  | 8.861 | -9.976 | 9.46E-06 | 0.0003132 | 5.828 | <a href="#">10295</a>  | BCKDK     | branched chain ketoacid dehydrogenase kinase                                 | <a href="#">ENSG00000103507</a>                                                                       |
| A_23_P128396 | -0.5978 | 8.121 | -9.98  | 9.43E-06 | 0.0003128 | 5.83  | <a href="#">80196</a>  | RNF34     | ring finger protein 34                                                       | <a href="#">ENSG00000170633</a>                                                                       |
| A_23_P86037  | -0.4948 | 5.743 | -9.983 | 9.41E-06 | 0.0003128 | 5.832 | <a href="#">55585</a>  | UBE2Q1    | ubiquitin-conjugating enzyme E2Q family member 1                             | <a href="#">ENSG00000160714</a>                                                                       |
| A_23_P212844 | -1.056  | 10.08 | -9.984 | 9.41E-06 | 0.0003128 | 5.833 | <a href="#">10460</a>  | TACC3     | transforming acidic coiled-coil containing protein 3                         | <a href="#">ENSG00000013810</a>                                                                       |
| A_32_P72447  | -0.9156 | 12.33 | -9.994 | 9.34E-06 | 0.0003111 | 5.841 | <a href="#">27338</a>  | UBE2S     | ubiquitin-conjugating enzyme E2S                                             | <a href="#">ENSG00000108106</a>                                                                       |
| A_23_P68452  | -1.044  | 8.483 | -9.999 | 9.30E-06 | 0.0003105 | 5.844 | <a href="#">51006</a>  | SLC35C2   | solute carrier family 35 member C2                                           | <a href="#">ENSG00000080189</a>                                                                       |
| A_23_P15937  | -0.4279 | 8.064 | -10    | 9.27E-06 | 0.0003102 | 5.848 | <a href="#">4087</a>   | SMAD2     | SMAD family member 2                                                         | <a href="#">ENSG00000175387</a>                                                                       |
| A_24_P377269 | -0.4445 | 13.23 | -10.01 | 9.24E-06 | 0.0003096 | 5.852 | <a href="#">3308</a>   | HSPA4     | heat shock 70kDa protein 4                                                   | <a href="#">ENSG00000170606</a>                                                                       |
| A_23_P28279  | -0.836  | 9.324 | -10.02 | 9.17E-06 | 0.0003086 | 5.859 | <a href="#">10120</a>  | ACTR1B    | ARP1 actin-related protein 1 homolog B centractin beta (yeast)               | <a href="#">ENSG00000115073</a>                                                                       |

|              |         |       |        |          |           |       |                        |          |                                                                                       |                                                                                                                                   |
|--------------|---------|-------|--------|----------|-----------|-------|------------------------|----------|---------------------------------------------------------------------------------------|-----------------------------------------------------------------------------------------------------------------------------------|
| A_23_P41872  | -0.9454 | 9.091 | -10.02 | 9.16E-06 | 0.0003083 | 5.86  | <a href="#">11285</a>  | B4GALT7  | xylosylprotein beta 1 4-galactosyltransferase polypeptide 7 (galactosyltransferase I) | <a href="#">ENSG00000027847</a>                                                                                                   |
| A_23_P86421  | -0.7419 | 8.107 | -10.02 | 9.19E-06 | 0.0003088 | 5.857 | <a href="#">8031</a>   | NCOA4    | nuclear receptor coactivator 4                                                        | <a href="#">ENSG00000138293</a>                                                                                                   |
| A_24_P106297 | -0.7465 | 7.644 | -10.02 | 9.15E-06 | 0.0003082 | 5.862 | <a href="#">23600</a>  | AMACR    | alpha-methylacyl-CoA racemase                                                         | ENSG00000082196<br><a href="#">ENSG00000242110</a>                                                                                |
| A_23_P58482  | -0.6837 | 10.21 | -10.05 | 8.95E-06 | 0.0003032 | 5.884 | <a href="#">4245</a>   | MGAT1    | mannosyl (alpha-1 3-)-glycoprotein beta-1 2-N-acetylglucosaminyltransferase           | <a href="#">ENSG00000131446</a>                                                                                                   |
| A_24_P79955  | -0.6559 | 7.723 | -10.05 | 8.96E-06 | 0.0003032 | 5.882 | <a href="#">9939</a>   | RBM8A    | RNA binding motif protein 8A                                                          | <a href="#">ENSG00000131795</a>                                                                                                   |
| A_23_P27493  | -0.6259 | 9.207 | -10.06 | 8.87E-06 | 0.0003015 | 5.893 | <a href="#">56342</a>  | PPAN     | peter pan homolog (Drosophila)                                                        | <a href="#">ENSG00000130810</a>                                                                                                   |
| A_24_P916251 | -0.3429 | 6.404 | -10.06 | 8.88E-06 | 0.0003015 | 5.892 | <a href="#">6158</a>   | RPL28    | ribosomal protein L28                                                                 | <a href="#">ENSG00000108107</a>                                                                                                   |
| A_23_P360983 | -0.3864 | 7.934 | -10.07 | 8.83E-06 | 0.0003007 | 5.897 | <a href="#">91942</a>  | NDUFAF2  | NADH dehydrogenase (ubiquinone) 1 alpha subcomplex assembly factor 2                  | <a href="#">ENSG00000164182</a>                                                                                                   |
| A_23_P120947 | -1.029  | 12.05 | -10.08 | 8.75E-06 | 0.0002988 | 5.906 | <a href="#">2547</a>   | XRCC6    | X-ray repair complementing defective repair in Chinese hamster cells 6                | <a href="#">ENSG00000196419</a>                                                                                                   |
| A_23_P142322 | -1.116  | 10.38 | -10.08 | 8.76E-06 | 0.000299  | 5.905 | <a href="#">1153</a>   | CIRBP    | cold inducible RNA binding protein                                                    | <a href="#">ENSG00000099622</a>                                                                                                   |
| A_24_P192197 | -1.099  | 8.936 | -10.08 | 8.73E-06 | 0.0002987 | 5.908 | <a href="#">56897</a>  | WRNIP1   | Werner helicase interacting protein 1                                                 | <a href="#">ENSG00000124535</a>                                                                                                   |
| A_23_P29855  | -0.3701 | 9.63  | -10.09 | 8.68E-06 | 0.0002973 | 5.914 | <a href="#">8615</a>   | USO1     | USO1 homolog vesicle docking protein (yeast)                                          | <a href="#">ENSG00000138768</a>                                                                                                   |
| A_24_P140391 | -0.9803 | 8.197 | -10.09 | 8.72E-06 | 0.0002984 | 5.91  | <a href="#">84992</a>  | PIGY     | phosphatidylinositol glycan anchor biosynthesis class Y                               | <a href="#">ENSG00000145337</a>                                                                                                   |
| A_23_P23966  | -0.5611 | 8.035 | -10.11 | 8.55E-06 | 0.000294  | 5.929 | <a href="#">118738</a> | ZNF488   | zinc finger protein 488                                                               | <a href="#">ENSG00000165388</a>                                                                                                   |
| A_23_P28980  | -0.6278 | 8.314 | -10.11 | 8.57E-06 | 0.0002942 | 5.927 | <a href="#">128869</a> | PIGU     | phosphatidylinositol glycan anchor biosynthesis class U                               | <a href="#">ENSG00000101464</a>                                                                                                   |
| A_23_P120915 | -0.904  | 7.746 | -10.12 | 8.50E-06 | 0.000293  | 5.935 | <a href="#">129138</a> | ANKRD54  | ankyrin repeat domain 54                                                              | <a href="#">ENSG00000100124</a>                                                                                                   |
| A_24_P320526 | -0.6496 | 7.849 | -10.13 | 8.45E-06 | 0.0002915 | 5.941 | <a href="#">64771</a>  | C6orf106 | chromosome 6 open reading frame 106                                                   | <a href="#">ENSG00000196821</a>                                                                                                   |
| A_23_P136916 | -0.702  | 10.73 | -10.17 | 8.21E-06 | 0.0002849 | 5.97  | <a href="#">64743</a>  | WDR13    | WD repeat domain 13                                                                   | <a href="#">ENSG00000101940</a>                                                                                                   |
| A_23_P3514   | -0.6533 | 9.351 | -10.17 | 8.20E-06 | 0.0002846 | 5.972 | <a href="#">29105</a>  | C16orf80 | chromosome 16 open reading frame 80                                                   | <a href="#">ENSG00000070761</a>                                                                                                   |
| A_23_P109928 | -0.5422 | 10.47 | -10.18 | 8.16E-06 | 0.0002846 | 5.976 | <a href="#">9861</a>   | PSMD6    | proteasome (prosome macropain) 26S subunit non-ATPase 6                               | <a href="#">ENSG00000163636</a>                                                                                                   |
| A_23_P160598 | -0.4569 | 10.08 | -10.18 | 8.13E-06 | 0.0002842 | 5.98  | <a href="#">114034</a> | TOE1     | target of EGR1 member 1 (nuclear)                                                     | <a href="#">ENSG00000132773</a>                                                                                                   |
| A_24_P225448 | -0.9844 | 6.945 | -10.2  | 8.01E-06 | 0.000281  | 5.994 | <a href="#">1465</a>   | CSRP1    | cysteine and glycine-rich protein 1                                                   | <a href="#">ENSG00000159176</a>                                                                                                   |
| A_24_P396375 | -1.801  | 8.243 | -10.21 | 7.97E-06 | 0.0002795 | 6     | <a href="#">1889</a>   | ECE1     | endothelin converting enzyme 1                                                        | <a href="#">ENSG00000117298</a>                                                                                                   |
| A_23_P214658 | -0.4895 | 6.625 | -10.22 | 7.93E-06 | 0.0002786 | 6.004 | <a href="#">5089</a>   | PBX2     | pre-B-cell leukemia homeobox 2                                                        | ENSG00000204304<br>ENSG00000206315<br>ENSG00000224952<br>ENSG00000225987<br>ENSG00000232005<br>ENSG00000236353<br>ENSG00000237344 |
| A_23_P150365 | -0.3258 | 12.11 | -10.23 | 7.87E-06 | 0.0002772 | 6.013 | <a href="#">25996</a>  | REXO2    | REX2 RNA exonuclease 2 homolog (S. cerevisiae)                                        | <a href="#">ENSG00000076043</a>                                                                                                   |
| A_23_P208516 | -0.448  | 11.83 | -10.24 | 7.82E-06 | 0.0002761 | 6.019 | <a href="#">79143</a>  | MBOAT7   | membrane bound O-acyltransferase domain containing 7                                  | <a href="#">ENSG00000125505</a>                                                                                                   |
| A_23_P370989 | -0.44   | 6     | -10.24 | 7.80E-06 | 0.0002758 | 6.021 | <a href="#">4173</a>   | MCM4     | minichromosome maintenance complex component 4                                        | <a href="#">ENSG00000104738</a>                                                                                                   |

|              |         |       |        |          |           |       |                        |           |                                                                                                               |                                                                                                                                                                                                                                                   |
|--------------|---------|-------|--------|----------|-----------|-------|------------------------|-----------|---------------------------------------------------------------------------------------------------------------|---------------------------------------------------------------------------------------------------------------------------------------------------------------------------------------------------------------------------------------------------|
| A_23_P166910 | -0.4679 | 8.196 | -10.26 | 7.69E-06 | 0.0002729 | 6.036 | <a href="#">23317</a>  | DNAJC13   | DnaJ (Hsp40) homolog subfamily C member 13                                                                    | <a href="#">ENSG00000138246</a>                                                                                                                                                                                                                   |
| A_32_P28365  | -0.8796 | 6.174 | -10.26 | 7.68E-06 | 0.0002728 | 6.037 | <a href="#">4678</a>   | NASP      | nuclear autoantigenic sperm protein (histone-binding)                                                         | <a href="#">ENSG00000132780</a>                                                                                                                                                                                                                   |
| A_24_P122050 | -0.8387 | 8.421 | -10.27 | 7.65E-06 | 0.0002724 | 6.041 | <a href="#">9491</a>   | PSMF1     | proteasome (prosome macropain) inhibitor subunit 1 (PI31)                                                     | <a href="#">ENSG00000125818</a>                                                                                                                                                                                                                   |
| A_24_P393844 | -0.7031 | 9.229 | -10.27 | 7.63E-06 | 0.0002724 | 6.043 | <a href="#">1802</a>   | DPH2      | DPH2 homolog (S. cerevisiae)                                                                                  | <a href="#">ENSG00000132768</a>                                                                                                                                                                                                                   |
| A_24_P849801 | -1.01   | 9.045 | -10.27 | 7.65E-06 | 0.0002724 | 6.041 | <a href="#">6146</a>   | RPL22     | ribosomal protein L22                                                                                         | <a href="#">ENSG00000116251</a>                                                                                                                                                                                                                   |
| A_23_P212706 | -0.5532 | 8.678 | -10.29 | 7.52E-06 | 0.0002692 | 6.058 | <a href="#">64422</a>  | ATG3      | ATG3 autophagy related 3 homolog (S. cerevisiae)                                                              | <a href="#">ENSG00000144848</a>                                                                                                                                                                                                                   |
| A_23_P252913 | -0.4309 | 6.565 | -10.29 | 7.52E-06 | 0.0002692 | 6.058 | <a href="#">55212</a>  | BBS7      | Bardet-Biedl syndrome 7                                                                                       | <a href="#">ENSG00000138686</a>                                                                                                                                                                                                                   |
| A_24_P11965  | -1.272  | 12.01 | -10.29 | 7.52E-06 | 0.0002692 | 6.058 | <a href="#">93621</a>  | MRFAP1    | Mof4 family associated protein 1                                                                              | <a href="#">ENSG00000179010</a>                                                                                                                                                                                                                   |
| A_23_P432506 | -0.3573 | 5.609 | -10.3  | 7.48E-06 | 0.0002687 | 6.064 | <a href="#">253868</a> | C20orf200 | chromosome 20 open reading frame 200                                                                          | <a href="#">ENSG00000174403</a>                                                                                                                                                                                                                   |
| A_24_P740705 | -0.4779 | 11.83 | -10.3  | 7.45E-06 | 0.000268  | 6.067 | <a href="#">91582</a>  | RPS19BP1  | ribosomal protein S19 binding protein 1                                                                       | <a href="#">ENSG00000187051</a>                                                                                                                                                                                                                   |
| A_23_P105519 | -0.6332 | 6.31  | -10.31 | 7.42E-06 | 0.0002678 | 6.071 | <a href="#">51729</a>  | WBP11     | WW domain binding protein 11                                                                                  | <a href="#">ENSG00000084463</a>                                                                                                                                                                                                                   |
| A_23_P146187 | -0.617  | 6.456 | -10.31 | 7.44E-06 | 0.0002678 | 6.069 | <a href="#">23212</a>  | RRS1      | RRS1 ribosome biogenesis regulator homolog (S. cerevisiae)                                                    | <a href="#">ENSG00000179041</a>                                                                                                                                                                                                                   |
| A_23_P209477 | -1.487  | 8.975 | -10.31 | 7.44E-06 | 0.0002678 | 6.069 | <a href="#">5496</a>   | PPM1G     | protein phosphatase 1G (formerly 2C) magnesium-dependent gamma isoform                                        | <a href="#">ENSG00000115241</a>                                                                                                                                                                                                                   |
| A_23_P154025 | -0.6599 | 11.16 | -10.32 | 7.37E-06 | 0.0002669 | 6.078 | <a href="#">6741</a>   | SSB       | Sjogren syndrome antigen B (autoantigen La)                                                                   | <a href="#">ENSG00000138385</a>                                                                                                                                                                                                                   |
| A_23_P89509  | -0.6062 | 10.37 | -10.33 | 7.31E-06 | 0.0002653 | 6.086 | <a href="#">10615</a>  | SPAG5     | sperm associated antigen 5                                                                                    | <a href="#">ENSG00000076382</a>                                                                                                                                                                                                                   |
| A_23_P349817 | -0.5143 | 7.261 | -10.36 | 7.13E-06 | 0.0002611 | 6.111 | <a href="#">2963</a>   | GTF2F2    | general transcription factor IIF polypeptide 2 30kDa                                                          | <a href="#">ENSG00000188342</a>                                                                                                                                                                                                                   |
| A_32_P22257  | -0.8798 | 11.6  | -10.36 | 7.17E-06 | 0.0002619 | 6.105 | <a href="#">3150</a>   | HMGN1     | high-mobility group nucleosome binding domain 1                                                               | <a href="#">ENSG00000205581</a>                                                                                                                                                                                                                   |
| A_23_P141636 | -0.6723 | 11.69 | -10.37 | 7.10E-06 | 0.0002608 | 6.116 | <a href="#">9775</a>   | EIF4A3    | eukaryotic translation initiation factor 4A3                                                                  | <a href="#">ENSG00000141543</a>                                                                                                                                                                                                                   |
| A_23_P14193  | -0.6183 | 7.27  | -10.37 | 7.13E-06 | 0.0002611 | 6.112 | <a href="#">5983</a>   | RFC3      | replication factor C (activator 1) 3 38kDa                                                                    | <a href="#">ENSG00000133119</a>                                                                                                                                                                                                                   |
| A_23_P207014 | -0.4662 | 9.275 | -10.38 | 7.07E-06 | 0.0002599 | 6.12  | <a href="#">5889</a>   | RAD51C    | RAD51 homolog C (S. cerevisiae)                                                                               | <a href="#">ENSG00000108384</a>                                                                                                                                                                                                                   |
| A_23_P9677   | -0.6626 | 6.597 | -10.38 | 7.05E-06 | 0.0002599 | 6.122 | <a href="#">54910</a>  | SEMA4C    | sema domain immunoglobulin domain (Ig) transmembrane domain (TM) and short cytoplasmic domain (semaphorin) 4C | <a href="#">ENSG00000168758</a>                                                                                                                                                                                                                   |
| A_32_P201496 | -1.213  | 7.644 | -10.38 | 7.04E-06 | 0.0002598 | 6.123 | <a href="#">171568</a> | POLR3H    | polymerase (RNA) III (DNA directed) polypeptide H (22.9kD)                                                    | <a href="#">ENSG00000100413</a>                                                                                                                                                                                                                   |
| A_23_P258093 | -0.4304 | 10.97 | -10.4  | 6.98E-06 | 0.0002586 | 6.133 | <a href="#">10554</a>  | AGPAT1    | 1-acylglycerol-3-phosphate O-acyltransferase 1 (lysophosphatidic acid acyltransferase alpha)                  | <a href="#">ENSG00000204310</a><br><a href="#">ENSG00000206324</a><br><a href="#">ENSG00000226467</a><br><a href="#">ENSG00000227642</a><br><a href="#">ENSG00000228892</a><br><a href="#">ENSG00000235758</a><br><a href="#">ENSG00000236873</a> |
| A_23_P373645 | -0.5477 | 8.482 | -10.4  | 6.96E-06 | 0.0002583 | 6.135 | <a href="#">10431</a>  | TIMM23    | translocase of inner mitochondrial membrane 23 homolog (yeast)                                                | <a href="#">ENSG00000138297</a><br><a href="#">ENSG00000204152</a>                                                                                                                                                                                |
| A_23_P149664 | -0.427  | 9.302 | -10.41 | 6.88E-06 | 0.000257  | 6.146 | <a href="#">653659</a> | TMEM183B  | transmembrane protein 183B                                                                                    | <a href="#">ENSG00000163444</a>                                                                                                                                                                                                                   |
| A_23_P160631 | -0.6372 | 13.27 | -10.41 | 6.89E-06 | 0.0002571 | 6.145 | <a href="#">7203</a>   | CCT3      | chaperonin containing TCP1 subunit 3 (gamma)                                                                  | <a href="#">ENSG00000163468</a>                                                                                                                                                                                                                   |
| A_24_P4661   | -1.258  | 9.958 | -10.41 | 6.91E-06 | 0.0002573 | 6.143 | <a href="#">9538</a>   | EI24      | etoposide induced 2.4 mRNA                                                                                    | <a href="#">ENSG00000149547</a>                                                                                                                                                                                                                   |

|              |         |       |        |          |           |       |                        |          |                                                                                                          |                                 |
|--------------|---------|-------|--------|----------|-----------|-------|------------------------|----------|----------------------------------------------------------------------------------------------------------|---------------------------------|
| A_23_P115861 | -0.4592 | 6.021 | -10.42 | 6.87E-06 | 0.0002568 | 6.148 | <a href="#">220992</a> | ZNF485   | zinc finger protein 485                                                                                  | <a href="#">ENSG00000198298</a> |
| A_23_P145408 | -0.5471 | 9.491 | -10.42 | 6.87E-06 | 0.0002568 | 6.148 | <a href="#">2519</a>   | FUCA2    | fucosidase alpha-L- 2 plasma                                                                             | <a href="#">ENSG00000001036</a> |
| A_23_P255569 | -0.9233 | 9.879 | -10.45 | 6.73E-06 | 0.0002523 | 6.169 | <a href="#">64118</a>  | DUS1L    | dihydrouridine synthase 1-like (S. cerevisiae)                                                           | <a href="#">ENSG00000169718</a> |
| A_23_P122375 | -0.6866 | 6.57  | -10.46 | 6.68E-06 | 0.0002507 | 6.177 | <a href="#">60685</a>  | ZFAND3   | zinc finger AN1-type domain 3                                                                            | <a href="#">ENSG00000156639</a> |
| A_23_P140088 | -0.3787 | 6.084 | -10.46 | 6.65E-06 | 0.0002503 | 6.182 | <a href="#">79621</a>  | RNASEH2B | ribonuclease H2 subunit B                                                                                | <a href="#">ENSG00000136104</a> |
| A_32_P230547 | -0.6449 | 7.31  | -10.47 | 6.61E-06 | 0.0002494 | 6.187 | <a href="#">85440</a>  | DOCK7    | dedicator of cytokinesis 7                                                                               | <a href="#">ENSG00000116641</a> |
| A_32_P89073  | -0.7489 | 7.592 | -10.47 | 6.60E-06 | 0.0002494 | 6.188 | <a href="#">90378</a>  | SAMD1    | sterile alpha motif domain containing 1                                                                  | <a href="#">NA</a>              |
| A_23_P123866 | -0.5208 | 7.262 | -10.48 | 6.59E-06 | 0.0002493 | 6.191 | <a href="#">51271</a>  | UBAP1    | ubiquitin associated protein 1                                                                           | <a href="#">ENSG00000165006</a> |
| A_23_P52082  | -0.6441 | 6.411 | -10.48 | 6.58E-06 | 0.0002493 | 6.192 | <a href="#">25896</a>  | INTS7    | integrator complex subunit 7                                                                             | <a href="#">ENSG00000143493</a> |
| A_23_P104065 | -0.9675 | 7.759 | -10.49 | 6.51E-06 | 0.0002478 | 6.203 | <a href="#">23463</a>  | ICMT     | isoprenylcysteine carboxyl methyltransferase                                                             | <a href="#">ENSG00000116237</a> |
| A_24_P190424 | -1.688  | 8.172 | -10.49 | 6.54E-06 | 0.0002487 | 6.198 | <a href="#">4218</a>   | RAB8A    | RAB8A member RAS oncogene family                                                                         | <a href="#">ENSG00000167461</a> |
| A_24_P269398 | -0.6362 | 7.341 | -10.52 | 6.40E-06 | 0.0002445 | 6.22  | <a href="#">835</a>    | CASP2    | caspase 2 apoptosis-related cysteine peptidase                                                           | <a href="#">ENSG00000106144</a> |
| A_23_P24960  | -1.04   | 8.234 | -10.53 | 6.35E-06 | 0.0002432 | 6.228 | <a href="#">79731</a>  | NARS2    | asparaginyl-tRNA synthetase 2 mitochondrial (putative)                                                   | <a href="#">ENSG00000137513</a> |
| A_23_P36408  | -0.5366 | 6.963 | -10.53 | 6.35E-06 | 0.0002432 | 6.227 | <a href="#">65082</a>  | VPS33A   | vacuolar protein sorting 33 homolog A (S. cerevisiae)                                                    | <a href="#">ENSG00000139719</a> |
| A_24_P266035 | -0.5953 | 8.051 | -10.53 | 6.34E-06 | 0.0002432 | 6.228 | <a href="#">27292</a>  | DIMT1L   | DIM1 dimethyladenosine transferase 1-like (S. cerevisiae)                                                | <a href="#">ENSG00000086189</a> |
| A_23_P108641 | -0.5139 | 8.138 | -10.54 | 6.29E-06 | 0.0002417 | 6.236 | <a href="#">84908</a>  | FAM136A  | family with sequence similarity 136 member A                                                             | <a href="#">ENSG00000035141</a> |
| A_23_P119464 | -0.8013 | 6.883 | -10.55 | 6.24E-06 | 0.0002414 | 6.244 | <a href="#">85415</a>  | RHPN2    | rhopilin Rho GTPase binding protein 2                                                                    | <a href="#">ENSG00000131941</a> |
| A_23_P120982 | -0.4158 | 5.569 | -10.55 | 6.27E-06 | 0.0002415 | 6.24  | <a href="#">10343</a>  | PKDREJ   | polycystic kidney disease (polycystin) and REJ homolog (sperm receptor for egg jelly homolog sea urchin) | <a href="#">ENSG00000130943</a> |
| A_23_P256223 | -0.508  | 7.049 | -10.55 | 6.25E-06 | 0.0002414 | 6.242 | <a href="#">7411</a>   | VBP1     | von Hippel-Lindau binding protein 1                                                                      | <a href="#">ENSG00000155959</a> |
| A_23_P340728 | -1.148  | 7.075 | -10.55 | 6.26E-06 | 0.0002414 | 6.242 | <a href="#">5663</a>   | PSEN1    | presenilin 1                                                                                             | <a href="#">ENSG00000080815</a> |
| A_23_P42368  | -0.6472 | 7.429 | -10.55 | 6.27E-06 | 0.0002415 | 6.239 | <a href="#">51534</a>  | VTA1     | Vps20-associated 1 homolog (S. cerevisiae)                                                               | <a href="#">ENSG00000009844</a> |
| A_23_P50020  | -0.512  | 6.59  | -10.57 | 6.15E-06 | 0.0002396 | 6.259 | <a href="#">9382</a>   | COG1     | component of oligomeric golgi complex 1                                                                  | <a href="#">ENSG00000166685</a> |
| A_24_P328819 | -0.5956 | 7.255 | -10.58 | 6.11E-06 | 0.0002383 | 6.266 | <a href="#">60684</a>  | C4orf41  | chromosome 4 open reading frame 41                                                                       | <a href="#">ENSG00000168538</a> |
| A_23_P35609  | -0.8438 | 8.046 | -10.59 | 6.09E-06 | 0.0002383 | 6.269 | <a href="#">7390</a>   | UROS     | uroporphyrinogen III synthase                                                                            | <a href="#">ENSG00000188690</a> |
| A_23_P392383 | -0.6527 | 7.146 | -10.59 | 6.10E-06 | 0.0002383 | 6.267 | <a href="#">23367</a>  | LARP1    | La ribonucleoprotein domain family member 1                                                              | <a href="#">ENSG00000155506</a> |
| A_23_P88848  | -0.8859 | 7.716 | -10.59 | 6.06E-06 | 0.0002375 | 6.273 | <a href="#">54920</a>  | DUS2L    | dihydrouridine synthase 2-like SMM1 homolog (S. cerevisiae)                                              | <a href="#">ENSG00000167264</a> |
| A_23_P208523 | -0.7048 | 6.739 | -10.61 | 5.98E-06 | 0.0002361 | 6.287 | <a href="#">79165</a>  | LENG1    | leukocyte receptor cluster (LRC) member 1                                                                | <a href="#">ENSG00000105617</a> |
| A_23_P257945 | -0.4035 | 9.48  | -10.61 | 6.01E-06 | 0.0002362 | 6.283 | <a href="#">3052</a>   | HCCS     | holocytochrome c synthase (cytochrome c heme-lyase)                                                      | <a href="#">ENSG00000004961</a> |
| A_23_P345887 | -0.5741 | 6.347 | -10.61 | 5.98E-06 | 0.0002361 | 6.287 | <a href="#">2673</a>   | GFPT1    | glutamine-fructose-6-phosphate transaminase 1                                                            | <a href="#">ENSG00000198380</a> |
| A_23_P47955  | -0.4601 | 6.614 | -10.61 | 5.99E-06 | 0.0002362 | 6.285 | <a href="#">4940</a>   | OAS3     | 2'-5'-oligoadenylate synthetase 3 100kDa                                                                 | <a href="#">ENSG00000111331</a> |
| A_23_P2935   | -0.5778 | 6.16  | -10.63 | 5.90E-06 | 0.0002337 | 6.301 | <a href="#">283635</a> | FAM177A1 | family with sequence similarity 177 member A1                                                            | <a href="#">ENSG00000151327</a> |



|              |         |       |        |          |           |       |                       |        |                                                          |                                 |
|--------------|---------|-------|--------|----------|-----------|-------|-----------------------|--------|----------------------------------------------------------|---------------------------------|
| A_23_P164035 | -1.362  | 7.817 | -10.65 | 5.83E-06 | 0.0002323 | 6.312 | <a href="#">5705</a>  | PSMC5  | proteasome (prosome macropain) 26S subunit ATPase 5      | <a href="#">ENSG00000087191</a> |
| A_23_P167789 | -0.4487 | 6.413 | -10.65 | 5.82E-06 | 0.000232  | 6.314 | <a href="#">51307</a> | FAM53C | family with sequence similarity 53 member C              | <a href="#">ENSG00000120709</a> |
| A_23_P157861 | -1.524  | 7.358 | -10.66 | 5.77E-06 | 0.0002311 | 6.322 | <a href="#">57109</a> | REXO4  | REX4 RNA exonuclease 4 homolog (S. cerevisiae)           | <a href="#">ENSG00000148300</a> |
| A_23_P154522 | -0.4595 | 7.36  | -10.68 | 5.70E-06 | 0.0002296 | 6.334 | <a href="#">57504</a> | MTA3   | metastasis associated 1 family member 3                  | <a href="#">ENSG00000057935</a> |
| A_23_P501745 | -1.211  | 7.433 | -10.68 | 5.69E-06 | 0.0002294 | 6.336 | <a href="#">5192</a>  | PEX10  | peroxisomal biogenesis factor 10                         | <a href="#">ENSG00000157911</a> |
| A_23_P78372  | -0.5452 | 6.627 | -10.68 | 5.71E-06 | 0.0002297 | 6.333 | <a href="#">9984</a>  | THOC1  | THO complex 1                                            | <a href="#">ENSG00000079134</a> |
| A_23_P145388 | -0.6    | 13.37 | -10.7  | 5.61E-06 | 0.0002277 | 6.35  | <a href="#">23787</a> | MTCH1  | mitochondrial carrier homolog 1 (C. elegans)             | <a href="#">ENSG00000137409</a> |
| A_23_P39116  | -0.7993 | 11.72 | -10.7  | 5.63E-06 | 0.0002281 | 6.348 | <a href="#">3978</a>  | LIG1   | ligase I DNA ATP-dependent                               | <a href="#">ENSG00000105486</a> |
| A_23_P8139   | -0.6907 | 6.858 | -10.7  | 5.64E-06 | 0.0002282 | 6.346 | <a href="#">7629</a>  | ZNF76  | zinc finger protein 76 (expressed in testis)             | <a href="#">ENSG00000065029</a> |
| A_23_P40354  | -0.435  | 8.817 | -10.73 | 5.51E-06 | 0.0002249 | 6.368 | <a href="#">22919</a> | MAPRE1 | microtubule-associated protein RP/EB family member 1     | <a href="#">ENSG00000101367</a> |
| A_23_P41327  | -0.9193 | 7.405 | -10.73 | 5.52E-06 | 0.0002249 | 6.366 | <a href="#">55646</a> | LYAR   | Ly1 antibody reactive homolog (mouse)                    | <a href="#">ENSG00000145220</a> |
| A_23_P120237 | -0.363  | 11.35 | -10.75 | 5.43E-06 | 0.0002222 | 6.382 | <a href="#">56910</a> | STARD7 | StAR-related lipid transfer (START) domain containing 7  | <a href="#">ENSG00000084090</a> |
| A_23_P94795  | -0.8553 | 9.516 | -10.75 | 5.43E-06 | 0.0002221 | 6.383 | <a href="#">7004</a>  | TEAD4  | TEA domain family member 4                               | <a href="#">ENSG00000197905</a> |
| A_23_P106439 | -0.5477 | 7.851 | -10.76 | 5.39E-06 | 0.0002217 | 6.39  | <a href="#">91433</a> | RCCD1  | RCC1 domain containing 1                                 | <a href="#">ENSG00000166965</a> |
| A_23_P26799  | -0.395  | 8.069 | -10.76 | 5.38E-06 | 0.0002216 | 6.391 | <a href="#">9526</a>  | MPDU1  | mannose-P-dolichol utilization defect 1                  | <a href="#">ENSG00000129255</a> |
| A_24_P308628 | -0.6437 | 7.251 | -10.76 | 5.41E-06 | 0.0002221 | 6.387 | <a href="#">51409</a> | HEMK1  | HemK methyltransferase family member 1                   | <a href="#">ENSG00000114735</a> |
| A_23_P46928  | -0.4787 | 14.2  | -10.77 | 5.37E-06 | 0.0002214 | 6.393 | <a href="#">5214</a>  | PFKP   | phosphofructokinase platelet                             | <a href="#">ENSG00000067057</a> |
| A_24_P146603 | -0.5685 | 10.4  | -10.78 | 5.33E-06 | 0.00022   | 6.402 | <a href="#">9188</a>  | DDX21  | DEAD (Asp-Glu-Ala-Asp) box polypeptide 21                | <a href="#">ENSG00000165732</a> |
| A_23_P15705  | -0.7241 | 12.92 | -10.79 | 5.31E-06 | 0.0002193 | 6.406 | <a href="#">5694</a>  | PSMB6  | proteasome (prosome macropain) subunit beta type 6       | <a href="#">ENSG00000142507</a> |
| A_32_P51084  | -0.3927 | 10.54 | -10.8  | 5.27E-06 | 0.000219  | 6.413 | <a href="#">23165</a> | NUP205 | nucleoporin 205kDa                                       | <a href="#">ENSG00000155561</a> |
| A_23_P161446 | -0.6031 | 7.293 | -10.81 | 5.22E-06 | 0.0002173 | 6.423 | <a href="#">2665</a>  | GDI2   | GDP dissociation inhibitor 2                             | <a href="#">ENSG00000057608</a> |
| A_23_P80342  | -0.6313 | 8.275 | -10.83 | 5.13E-06 | 0.0002149 | 6.44  | <a href="#">10454</a> | TAB1   | TGF-beta activated kinase 1/MAP3K7 binding protein 1     | <a href="#">ENSG00000100324</a> |
| A_24_P132813 | -0.5524 | 5.79  | -10.83 | 5.15E-06 | 0.0002155 | 6.436 | <a href="#">93377</a> | OPALIN | oligodendrocytic myelin paranodal and inner loop protein | <a href="#">ENSG00000197430</a> |
| A_23_P158627 | -0.3937 | 9.853 | -10.84 | 5.12E-06 | 0.0002149 | 6.441 | <a href="#">79050</a> | NOC4L  | nucleolar complex associated 4 homolog (S. cerevisiae)   | <a href="#">ENSG00000184967</a> |
| A_23_P168629 | -0.7363 | 9.747 | -10.84 | 5.11E-06 | 0.0002148 | 6.443 | <a href="#">55131</a> | RBM28  | RNA binding motif protein 28                             | <a href="#">ENSG00000106344</a> |
| A_23_P132948 | -0.3752 | 6.894 | -10.85 | 5.06E-06 | 0.0002139 | 6.453 | <a href="#">1998</a>  | ELF2   | E74-like factor 2 (ets domain transcription factor)      | <a href="#">ENSG00000109381</a> |
| A_23_P158662 | -0.9618 | 10.08 | -10.85 | 5.06E-06 | 0.0002139 | 6.453 | <a href="#">2873</a>  | GPS1   | G protein pathway suppressor 1                           | <a href="#">ENSG00000169727</a> |
| A_24_P73158  | -1.818  | 10.3  | -10.85 | 5.07E-06 | 0.000214  | 6.451 | <a href="#">2237</a>  | FEN1   | flap structure-specific endonuclease 1                   | <a href="#">ENSG00000168496</a> |
| A_24_P118844 | -0.5275 | 5.938 | -10.88 | 4.96E-06 | 0.0002115 | 6.473 | <a href="#">23331</a> | TTC28  | tetratricopeptide repeat domain 28                       | <a href="#">ENSG00000100154</a> |
| A_23_P72961  | -1.504  | 9.094 | -10.91 | 4.86E-06 | 0.0002084 | 6.492 | <a href="#">5631</a>  | PRPS1  | phosphoribosyl pyrophosphate synthetase 1                | <a href="#">ENSG00000147224</a> |
| A_23_P28420  | -0.8574 | 10.87 | -10.94 | 4.77E-06 | 0.0002054 | 6.512 | <a href="#">29789</a> | OLA1   | Obg-like ATPase 1                                        | <a href="#">ENSG00000138430</a> |
| A_23_P57268  | -0.5825 | 6.526 | -10.94 | 4.77E-06 | 0.0002054 | 6.512 | <a href="#">1525</a>  | CXADR  | coxsackie virus and adenovirus receptor                  | <a href="#">ENSG00000154639</a> |

|              |         |       |        |          |           |       |                        |           |                                                                                  |                                 |
|--------------|---------|-------|--------|----------|-----------|-------|------------------------|-----------|----------------------------------------------------------------------------------|---------------------------------|
| A_24_P148836 | -0.4027 | 5.943 | -10.94 | 4.79E-06 | 0.000206  | 6.508 | <a href="#">200942</a> | KLHDC8B   | kelch domain containing 8B                                                       | <a href="#">ENSG00000185909</a> |
| A_32_P154091 | -0.3899 | 7.721 | -10.94 | 4.76E-06 | 0.0002054 | 6.513 | <a href="#">389641</a> | LOC389641 | hypothetical gene supported by AK124295                                          | NA                              |
| A_24_P13572  | -0.7167 | 6.602 | -10.95 | 4.75E-06 | 0.0002053 | 6.515 | <a href="#">1743</a>   | DLST      | dihydrolipoamide S-succinyltransferase (E2 component of 2-oxo-glutarate complex) | <a href="#">ENSG00000119689</a> |
| A_23_P154330 | -0.5122 | 8.111 | -10.96 | 4.70E-06 | 0.0002041 | 6.526 | <a href="#">10190</a>  | TXNDC9    | thioredoxin domain containing 9                                                  | <a href="#">ENSG00000115514</a> |
| A_23_P43820  | -0.4615 | 6.22  | -10.96 | 4.70E-06 | 0.0002041 | 6.526 | <a href="#">84879</a>  | MFSD2A    | major facilitator superfamily domain containing 2A                               | <a href="#">ENSG00000168389</a> |
| A_24_P407717 | -0.8881 | 8.783 | -10.96 | 4.72E-06 | 0.0002047 | 6.521 | <a href="#">2885</a>   | GRB2      | growth factor receptor-bound protein 2                                           | <a href="#">ENSG00000177885</a> |
| A_23_P40072  | -0.5718 | 6.484 | -10.97 | 4.69E-06 | 0.0002041 | 6.529 | <a href="#">4528</a>   | MTIF2     | mitochondrial translational initiation factor 2                                  | <a href="#">ENSG00000085760</a> |
| A_23_P68889  | -0.6558 | 11.57 | -10.97 | 4.67E-06 | 0.000204  | 6.531 | <a href="#">51493</a>  | C22orf28  | chromosome 22 open reading frame 28                                              | <a href="#">ENSG00000100220</a> |
| A_24_P321626 | -0.9756 | 7.48  | -10.97 | 4.68E-06 | 0.0002041 | 6.53  | <a href="#">55703</a>  | POLR3B    | polymerase (RNA) III (DNA directed) polypeptide B                                | <a href="#">ENSG00000013503</a> |
| A_23_P29885  | -0.4896 | 12.14 | -10.99 | 4.62E-06 | 0.0002024 | 6.543 | <a href="#">10296</a>  | MAEA      | macrophage erythroblast attacher                                                 | <a href="#">ENSG00000090316</a> |
| A_24_P108351 | -0.4738 | 7.103 | -10.99 | 4.60E-06 | 0.0002019 | 6.547 | <a href="#">11100</a>  | HNRNPUL1  | heterogeneous nuclear ribonucleoprotein U-like 1                                 | <a href="#">ENSG00000105323</a> |
| A_23_P310317 | -0.4883 | 12.41 | -11    | 4.59E-06 | 0.0002017 | 6.55  | <a href="#">6949</a>   | TCOF1     | Treacher Collins-Franceschetti syndrome 1                                        | <a href="#">ENSG00000070814</a> |
| A_23_P97157  | -0.49   | 8.606 | -11    | 4.58E-06 | 0.0002017 | 6.551 | <a href="#">55705</a>  | IPO9      | importin 9                                                                       | <a href="#">ENSG00000198700</a> |
| A_23_P24987  | -0.3485 | 6.15  | -11.01 | 4.55E-06 | 0.0002008 | 6.558 | <a href="#">6302</a>   | TSPAN31   | tetraspanin 31                                                                   | <a href="#">ENSG00000135452</a> |
| A_24_P66270  | -0.976  | 8.003 | -11.01 | 4.54E-06 | 0.0002005 | 6.56  | <a href="#">653639</a> | LYPLA2P1  | lysophospholipase II pseudogene 1                                                | NA                              |
| A_23_P149975 | -0.6024 | 10.83 | -11.05 | 4.44E-06 | 0.0001979 | 6.583 | <a href="#">83641</a>  | FAM107B   | family with sequence similarity 107 member B                                     | <a href="#">ENSG00000065809</a> |
| A_23_P154539 | -0.8727 | 12.77 | -11.06 | 4.39E-06 | 0.0001967 | 6.593 | <a href="#">24148</a>  | PRPF6     | PRP6 pre-mRNA processing factor 6 homolog (S. cerevisiae)                        | <a href="#">ENSG00000101161</a> |
| A_23_P56933  | -0.8869 | 10.35 | -11.07 | 4.38E-06 | 0.0001965 | 6.596 | <a href="#">57142</a>  | RTN4      | reticulin 4                                                                      | <a href="#">ENSG00000115310</a> |
| A_23_P67648  | -0.8447 | 12.09 | -11.07 | 4.37E-06 | 0.0001965 | 6.597 | <a href="#">826</a>    | CAPNS1    | calpain small subunit 1                                                          | <a href="#">ENSG00000126247</a> |
| A_24_P139742 | -0.4804 | 6.25  | -11.07 | 4.38E-06 | 0.0001966 | 6.595 | <a href="#">64802</a>  | NMNAT1    | nicotinamide nucleotide adenylyltransferase 1                                    | <a href="#">ENSG00000173614</a> |
| A_24_P171345 | -0.5668 | 7.801 | -11.07 | 4.37E-06 | 0.0001965 | 6.598 | <a href="#">9698</a>   | PUM1      | pumilio homolog 1 (Drosophila)                                                   | <a href="#">ENSG00000134644</a> |
| A_24_P276490 | -1.1    | 6.99  | -11.08 | 4.35E-06 | 0.0001961 | 6.601 | <a href="#">11313</a>  | LYPLA2    | lysophospholipase II                                                             | <a href="#">ENSG00000011009</a> |
| A_23_P41246  | -0.6063 | 10.04 | -11.11 | 4.26E-06 | 0.0001939 | 6.622 | <a href="#">10227</a>  | MFSD10    | major facilitator superfamily domain containing 10                               | <a href="#">ENSG00000109736</a> |
| A_23_P96087  | -0.9979 | 9.679 | -11.11 | 4.25E-06 | 0.0001935 | 6.625 | <a href="#">8971</a>   | H1FX      | H1 histone family member X                                                       | <a href="#">ENSG00000184897</a> |
| A_24_P335358 | -1.435  | 10.2  | -11.11 | 4.25E-06 | 0.0001935 | 6.626 | <a href="#">80324</a>  | PUS1      | pseudouridylyl synthase 1                                                        | <a href="#">ENSG00000177192</a> |
| A_23_P140511 | -0.4653 | 9.209 | -11.12 | 4.24E-06 | 0.0001932 | 6.629 | <a href="#">10845</a>  | CLPX      | ClpX caseinolytic peptidase X homolog (E. coli)                                  | <a href="#">ENSG00000166855</a> |
| A_23_P16673  | -0.5003 | 9.538 | -11.12 | 4.21E-06 | 0.0001926 | 6.634 | <a href="#">1265</a>   | CNN2      | calponin 2                                                                       | <a href="#">ENSG00000064666</a> |
| A_23_P63681  | -0.505  | 8.194 | -11.12 | 4.23E-06 | 0.0001931 | 6.63  | <a href="#">3416</a>   | IDE       | insulin-degrading enzyme                                                         | <a href="#">ENSG00000119912</a> |
| A_23_P30024  | -0.6952 | 9.045 | -11.13 | 4.20E-06 | 0.0001925 | 6.637 | <a href="#">4790</a>   | NFKB1     | nuclear factor of kappa light polypeptide gene enhancer in B-cells 1             | <a href="#">ENSG00000109320</a> |
| A_32_P88415  | -0.8888 | 6.192 | -11.13 | 4.19E-06 | 0.0001925 | 6.638 | <a href="#">91977</a>  | MYOZ3     | myozenin 3                                                                       | <a href="#">ENSG00000164591</a> |
| A_23_P202374 | -0.4771 | 9.084 | -11.14 | 4.16E-06 | 0.0001917 | 6.645 | <a href="#">1355</a>   | COX15     | COX15 homolog cytochrome c oxidase assembly protein (yeast)                      | <a href="#">ENSG00000014919</a> |

|              |         |       |        |          |           |       |                        |          |                                                                                         |                                 |
|--------------|---------|-------|--------|----------|-----------|-------|------------------------|----------|-----------------------------------------------------------------------------------------|---------------------------------|
| A_23_P49033  | -0.7945 | 8.793 | -11.15 | 4.15E-06 | 0.0001917 | 6.648 | <a href="#">6642</a>   | SNX1     | sorting nexin 1                                                                         | <a href="#">ENSG00000028528</a> |
| A_24_P254177 | -0.4537 | 7.283 | -11.15 | 4.14E-06 | 0.0001913 | 6.652 | <a href="#">79086</a>  | C19orf42 | chromosome 19 open reading frame 42                                                     | <a href="#">ENSG00000214046</a> |
| A_23_P329152 | -0.3879 | 10.66 | -11.16 | 4.10E-06 | 0.0001907 | 6.66  | <a href="#">3609</a>   | ILF3     | interleukin enhancer binding factor 3 90kDa                                             | <a href="#">ENSG00000129351</a> |
| A_23_P51754  | -1.067  | 8.21  | -11.18 | 4.07E-06 | 0.0001903 | 6.668 | <a href="#">5906</a>   | RAP1A    | RAP1A member of RAS oncogene family                                                     | <a href="#">ENSG00000116473</a> |
| A_23_P13502  | -0.3772 | 12.63 | -11.19 | 4.03E-06 | 0.000189  | 6.678 | <a href="#">51287</a>  | CHCHD8   | coiled-coil-helix-coiled-coil-helix domain containing 8                                 | <a href="#">ENSG00000181924</a> |
| A_23_P54147  | -0.6413 | 7.234 | -11.19 | 4.04E-06 | 0.0001894 | 6.676 | <a href="#">51199</a>  | NIN      | ninein (GSK3B interacting protein)                                                      | <a href="#">ENSG00000100503</a> |
| A_32_P57810  | -0.5024 | 5.984 | -11.2  | 4.00E-06 | 0.0001884 | 6.685 | <a href="#">114804</a> | RNF157   | ring finger protein 157                                                                 | <a href="#">ENSG00000141576</a> |
| A_23_P152651 | -0.5465 | 9.191 | -11.21 | 3.99E-06 | 0.0001881 | 6.688 | <a href="#">11325</a>  | DDX42    | DEAD (Asp-Glu-Ala-Asp) box polypeptide 42                                               | <a href="#">ENSG00000198231</a> |
| A_23_P152218 | -0.9057 | 8.183 | -11.22 | 3.96E-06 | 0.000187  | 6.696 | <a href="#">1874</a>   | E2F4     | E2F transcription factor 4 p107/p130-binding                                            | <a href="#">ENSG00000205250</a> |
| A_24_P257971 | -1.104  | 7.419 | -11.22 | 3.96E-06 | 0.000187  | 6.694 | <a href="#">10999</a>  | SLC27A4  | solute carrier family 27 (fatty acid transporter) member 4                              | <a href="#">ENSG00000167114</a> |
| A_23_P436476 | -0.7642 | 8.205 | -11.25 | 3.88E-06 | 0.0001842 | 6.716 | <a href="#">23029</a>  | RBM34    | RNA binding motif protein 34                                                            | <a href="#">ENSG00000188739</a> |
| A_23_P97573  | -0.5674 | 6.632 | -11.25 | 3.87E-06 | 0.0001842 | 6.717 | <a href="#">9129</a>   | PRPF3    | PRP3 pre-mRNA processing factor 3 homolog (S. cerevisiae)                               | <a href="#">ENSG00000117360</a> |
| A_24_P828949 | -0.4644 | 6.516 | -11.25 | 3.88E-06 | 0.0001842 | 6.715 | <a href="#">55110</a>  | MAGOHB   | mago-nashi homolog B (Drosophila)                                                       | <a href="#">ENSG00000111196</a> |
| A_23_P106463 | -0.7564 | 8.961 | -11.27 | 3.83E-06 | 0.0001829 | 6.728 | <a href="#">4947</a>   | OAZ2     | ornithine decarboxylase antizyme 2                                                      | <a href="#">ENSG00000180304</a> |
| A_23_P154507 | -0.5169 | 10.1  | -11.27 | 3.83E-06 | 0.0001829 | 6.729 | <a href="#">9270</a>   | ITGB1BP1 | integrin beta 1 binding protein 1                                                       | <a href="#">ENSG00000119185</a> |
| A_24_P277615 | -1.105  | 7.551 | -11.27 | 3.82E-06 | 0.0001829 | 6.731 | <a href="#">81786</a>  | TRIM7    | tripartite motif-containing 7                                                           | <a href="#">ENSG00000146054</a> |
| A_23_P161231 | -1.119  | 7.011 | -11.28 | 3.80E-06 | 0.0001821 | 6.737 | <a href="#">81855</a>  | SFXN3    | sideroflexin 3                                                                          | <a href="#">ENSG00000107819</a> |
| A_24_P347198 | -0.6254 | 8.825 | -11.28 | 3.80E-06 | 0.0001821 | 6.737 | <a href="#">8562</a>   | DENR     | density-regulated protein                                                               | <a href="#">ENSG00000139726</a> |
| A_23_P129486 | -0.5454 | 10.68 | -11.29 | 3.76E-06 | 0.000181  | 6.745 | <a href="#">51734</a>  | SEPX1    | selenoprotein X 1                                                                       | <a href="#">ENSG00000198736</a> |
| A_23_P77321  | -0.4613 | 6.59  | -11.33 | 3.69E-06 | 0.0001782 | 6.766 | <a href="#">23168</a>  | RTF1     | Rtf1 Paf1/RNA polymerase II complex component homolog (S. cerevisiae)                   | <a href="#">ENSG00000137815</a> |
| A_24_P131173 | -0.7541 | 6.485 | -11.35 | 3.62E-06 | 0.000176  | 6.783 | <a href="#">79762</a>  | C1orf115 | chromosome 1 open reading frame 115                                                     | <a href="#">ENSG00000162817</a> |
| A_23_P70748  | -0.6452 | 9.196 | -11.4  | 3.50E-06 | 0.0001716 | 6.817 | <a href="#">85021</a>  | REPS1    | RALBP1 associated Eps domain containing 1                                               | <a href="#">ENSG00000135597</a> |
| A_23_P100486 | -0.4393 | 11.65 | -11.41 | 3.49E-06 | 0.0001716 | 6.818 | <a href="#">79001</a>  | VKORC1   | vitamin K epoxide reductase complex subunit 1                                           | <a href="#">ENSG00000167397</a> |
| A_23_P120002 | -0.6097 | 6.661 | -11.42 | 3.46E-06 | 0.0001703 | 6.828 | <a href="#">3431</a>   | SP110    | SP110 nuclear body protein                                                              | <a href="#">ENSG00000135899</a> |
| A_23_P137731 | -0.7279 | 7.53  | -11.43 | 3.45E-06 | 0.0001698 | 6.832 | <a href="#">79577</a>  | CDC73    | cell division cycle 73 Paf1/RNA polymerase II complex component homolog (S. cerevisiae) | <a href="#">ENSG00000134371</a> |
| A_23_P57588  | -1.188  | 7.422 | -11.43 | 3.43E-06 | 0.0001696 | 6.837 | <a href="#">51512</a>  | GTSE1    | G-2 and S-phase expressed 1                                                             | <a href="#">ENSG00000075218</a> |
| A_24_P327815 | -1.332  | 10.05 | -11.44 | 3.41E-06 | 0.0001693 | 6.841 | <a href="#">10963</a>  | STIP1    | stress-induced-phosphoprotein 1                                                         | <a href="#">ENSG00000168439</a> |
| A_23_P108574 | -0.4716 | 6.715 | -11.45 | 3.40E-06 | 0.000169  | 6.846 | <a href="#">23683</a>  | PRKD3    | protein kinase D3                                                                       | <a href="#">ENSG00000115825</a> |
| A_23_P256855 | -0.7436 | 7.775 | -11.45 | 3.40E-06 | 0.000169  | 6.844 | <a href="#">57510</a>  | XPO5     | exportin 5                                                                              | <a href="#">ENSG00000124571</a> |
| A_23_P258621 | -0.4969 | 8.015 | -11.45 | 3.40E-06 | 0.000169  | 6.845 | <a href="#">8634</a>   | RTCD1    | RNA terminal phosphate cyclase domain 1                                                 | <a href="#">ENSG00000137996</a> |
| A_23_P16615  | -0.7504 | 10.72 | -11.47 | 3.35E-06 | 0.0001671 | 6.861 | <a href="#">4670</a>   | HNRNPM   | heterogeneous nuclear ribonucleoprotein M                                               | <a href="#">ENSG00000099783</a> |
| A_23_P151634 | -1.388  | 8.121 | -11.48 | 3.34E-06 | 0.000167  | 6.863 | <a href="#">11198</a>  | SUPT16H  | suppressor of Ty 16 homolog (S. cerevisiae)                                             | <a href="#">ENSG00000092201</a> |

|              |         |       |        |          |           |       |                        |           |                                                                                              |                                 |
|--------------|---------|-------|--------|----------|-----------|-------|------------------------|-----------|----------------------------------------------------------------------------------------------|---------------------------------|
| A_23_P123256 | -0.9934 | 7.251 | -11.49 | 3.31E-06 | 0.0001664 | 6.872 | <a href="#">11333</a>  | PDAP1     | PDGFA associated protein 1                                                                   | <a href="#">ENSG00000106244</a> |
| A_23_P150092 | -0.7876 | 10.75 | -11.49 | 3.31E-06 | 0.0001665 | 6.87  | <a href="#">22929</a>  | SEPHS1    | selenophosphate synthetase 1                                                                 | <a href="#">ENSG00000086475</a> |
| A_23_P200439 | -0.5484 | 6.409 | -11.5  | 3.29E-06 | 0.0001658 | 6.878 | <a href="#">103</a>    | ADAR      | adenosine deaminase RNA-specific                                                             | <a href="#">ENSG00000160710</a> |
| A_23_P2143   | -0.5782 | 10.35 | -11.51 | 3.26E-06 | 0.0001649 | 6.885 | <a href="#">9789</a>   | SPCS2     | signal peptidase complex subunit 2 homolog (S. cerevisiae)                                   | <a href="#">ENSG00000118363</a> |
| A_23_P33482  | -0.5741 | 6.471 | -11.52 | 3.25E-06 | 0.0001649 | 6.889 | <a href="#">7405</a>   | UVRAG     | UV radiation resistance associated gene                                                      | <a href="#">ENSG00000198382</a> |
| A_23_P97265  | -0.7614 | 10.19 | -11.53 | 3.22E-06 | 0.0001642 | 6.897 | <a href="#">54865</a>  | GPATCH4   | G patch domain containing 4                                                                  | <a href="#">ENSG00000160818</a> |
| A_32_P103060 | -0.5535 | 6.869 | -11.56 | 3.17E-06 | 0.0001624 | 6.914 | <a href="#">7555</a>   | CNBP      | CCHC-type zinc finger nucleic acid binding protein                                           | <a href="#">ENSG00000169714</a> |
| A_23_P159227 | -1.323  | 9.117 | -11.57 | 3.14E-06 | 0.0001612 | 6.922 | <a href="#">8751</a>   | ADAM15    | ADAM metallopeptidase domain 15                                                              | <a href="#">ENSG00000143537</a> |
| A_23_P68610  | -1.322  | 11.06 | -11.58 | 3.12E-06 | 0.0001605 | 6.928 | <a href="#">22974</a>  | TPX2      | TPX2 microtubule-associated homolog (Xenopus laevis)                                         | <a href="#">ENSG00000088325</a> |
| A_23_P12816  | -0.9665 | 7.609 | -11.59 | 3.11E-06 | 0.00016   | 6.933 | <a href="#">3070</a>   | HELLS     | helicase lymphoid-specific                                                                   | <a href="#">ENSG00000119969</a> |
| A_23_P141917 | -0.7135 | 7.446 | -11.6  | 3.07E-06 | 0.0001593 | 6.945 | <a href="#">7297</a>   | TYK2      | tyrosine kinase 2                                                                            | <a href="#">ENSG00000105397</a> |
| A_23_P100779 | -0.6235 | 7.139 | -11.61 | 3.05E-06 | 0.000159  | 6.951 | <a href="#">7343</a>   | UBTF      | upstream binding transcription factor RNA polymerase I                                       | <a href="#">ENSG00000108312</a> |
| A_24_P941845 | -0.6673 | 6.139 | -11.63 | 3.02E-06 | 0.0001577 | 6.962 | <a href="#">29925</a>  | GMPPB     | GDP-mannose pyrophosphorylase B                                                              | <a href="#">ENSG00000173540</a> |
| A_23_P119254 | -0.7213 | 9.331 | -11.64 | 3.01E-06 | 0.0001576 | 6.964 | <a href="#">55723</a>  | ASF1B     | ASF1 anti-silencing function 1 homolog B (S. cerevisiae)                                     | <a href="#">ENSG00000105011</a> |
| A_32_P218332 | -0.5312 | 9.37  | -11.65 | 2.99E-06 | 0.000157  | 6.971 | <a href="#">197322</a> | ACSF3     | acyl-CoA synthetase family member 3                                                          | <a href="#">ENSG00000176715</a> |
| A_23_P15511  | -1.279  | 12.28 | -11.68 | 2.93E-06 | 0.0001554 | 6.99  | <a href="#">1655</a>   | DDX5      | DEAD (Asp-Glu-Ala-Asp) box polypeptide 5                                                     | <a href="#">ENSG00000108654</a> |
| A_23_P416686 | -0.3961 | 6.674 | -11.7  | 2.89E-06 | 0.0001542 | 7.003 | <a href="#">56834</a>  | GPR137    | G protein-coupled receptor 137                                                               | <a href="#">ENSG00000173264</a> |
| A_23_P63751  | -0.4782 | 10.91 | -11.7  | 2.88E-06 | 0.000154  | 7.007 | <a href="#">10935</a>  | PRDX3     | peroxiredoxin 3                                                                              | <a href="#">ENSG00000165672</a> |
| A_24_P338636 | -0.6252 | 8.136 | -11.7  | 2.89E-06 | 0.0001542 | 7.004 | <a href="#">11171</a>  | STRAP     | serine/threonine kinase receptor associated protein                                          | <a href="#">ENSG00000023734</a> |
| A_24_P204697 | -0.6109 | 6.321 | -11.71 | 2.87E-06 | 0.0001536 | 7.012 | <a href="#">29774</a>  | POM121L9P | POM121 membrane glycoprotein-like 9 (rat) pseudogene                                         | <a href="#">NA</a>              |
| A_23_P153783 | -0.4854 | 7.254 | -11.74 | 2.82E-06 | 0.0001525 | 7.027 | <a href="#">7392</a>   | USF2      | upstream transcription factor 2 c-fos interacting                                            | <a href="#">ENSG00000105698</a> |
| A_23_P32320  | -0.5713 | 8.074 | -11.74 | 2.81E-06 | 0.0001525 | 7.03  | <a href="#">79058</a>  | ASPSCR1   | alveolar soft part sarcoma chromosome region candidate 1                                     | <a href="#">ENSG00000169696</a> |
| A_23_P92824  | -0.6375 | 6.495 | -11.74 | 2.82E-06 | 0.0001525 | 7.028 | <a href="#">83734</a>  | ATG10     | ATG10 autophagy related 10 homolog (S. cerevisiae)                                           | <a href="#">ENSG00000152348</a> |
| A_24_P942002 | -0.6506 | 6.671 | -11.77 | 2.76E-06 | 0.0001505 | 7.049 | <a href="#">23527</a>  | ACAP2     | ArfGAP with coiled-coil ankyrin repeat and PH domains 2                                      | <a href="#">ENSG00000114331</a> |
| A_23_P213000 | -1.187  | 10.2  | -11.78 | 2.74E-06 | 0.0001496 | 7.057 | <a href="#">9948</a>   | WDR1      | WD repeat domain 1                                                                           | <a href="#">ENSG00000071127</a> |
| A_23_P28057  | -1.202  | 12.77 | -11.78 | 2.74E-06 | 0.0001496 | 7.056 | <a href="#">7064</a>   | THOP1     | thimet oligopeptidase 1                                                                      | <a href="#">ENSG00000172009</a> |
| A_23_P501134 | -0.6456 | 7.032 | -11.79 | 2.72E-06 | 0.0001493 | 7.063 | <a href="#">3980</a>   | LIG3      | ligase III DNA ATP-dependent                                                                 | <a href="#">ENSG00000005156</a> |
| A_24_P11307  | -1.245  | 9.211 | -11.81 | 2.69E-06 | 0.0001481 | 7.074 | <a href="#">10768</a>  | AHCYL1    | adenosylhomocysteinase-like 1                                                                | <a href="#">ENSG00000168710</a> |
| A_32_P98683  | -0.4441 | 9.902 | -11.81 | 2.70E-06 | 0.0001483 | 7.071 | <a href="#">4302</a>   | MLLT6     | myeloid/lymphoid or mixed-lineage leukemia (trithorax homolog Drosophila); translocated to 6 | <a href="#">ENSG00000108292</a> |
| A_23_P122624 | -0.8389 | 7.905 | -11.82 | 2.68E-06 | 0.0001479 | 7.079 | <a href="#">84946</a>  | LTV1      | LTV1 homolog (S. cerevisiae)                                                                 | <a href="#">ENSG00000135521</a> |
| A_24_P39508  | -0.6656 | 6.964 | -11.86 | 2.60E-06 | 0.0001455 | 7.107 | <a href="#">123920</a> | CMTM3     | CKLF-like MARVEL transmembrane domain containing 3                                           | <a href="#">ENSG00000140931</a> |

|              |         |       |        |          |           |       |                        |          |                                                                                               |                                                                                                                                                                             |
|--------------|---------|-------|--------|----------|-----------|-------|------------------------|----------|-----------------------------------------------------------------------------------------------|-----------------------------------------------------------------------------------------------------------------------------------------------------------------------------|
| A_32_P199301 | -0.8958 | 7.957 | -11.87 | 2.58E-06 | 0.0001452 | 7.113 | <a href="#">7027</a>   | TFDP1    | transcription factor Dp-1                                                                     | <a href="#">ENSG00000198176</a>                                                                                                                                             |
| A_23_P102988 | -1.033  | 6.546 | -11.9  | 2.54E-06 | 0.0001433 | 7.129 | <a href="#">10587</a>  | TXNRD2   | thioredoxin reductase 2                                                                       | <a href="#">ENSG00000184470</a>                                                                                                                                             |
| A_24_P89701  | -0.4402 | 11.76 | -11.91 | 2.52E-06 | 0.0001424 | 7.136 | <a href="#">3614</a>   | IMPDH1   | IMP (inosine monophosphate) dehydrogenase 1                                                   | <a href="#">ENSG00000106348</a>                                                                                                                                             |
| A_23_P66487  | -1.249  | 8.292 | -11.99 | 2.41E-06 | 0.0001383 | 7.181 | <a href="#">6603</a>   | SMARCD2  | SWI/SNF related matrix associated actin dependent regulator of chromatin subfamily d member 2 | <a href="#">ENSG00000108604</a>                                                                                                                                             |
| A_24_P76740  | -0.5697 | 7.792 | -12    | 2.38E-06 | 0.0001374 | 7.192 | <a href="#">200014</a> | CC2D1B   | coiled-coil and C2 domain containing 1B                                                       | <a href="#">ENSG00000154222</a>                                                                                                                                             |
| A_23_P102351 | -1.394  | 7.177 | -12.01 | 2.37E-06 | 0.0001372 | 7.198 | <a href="#">9486</a>   | CHST10   | carbohydrate sulfotransferase 10                                                              | <a href="#">ENSG00000115526</a>                                                                                                                                             |
| A_32_P332    | -1.132  | 6.517 | -12.01 | 2.37E-06 | 0.0001372 | 7.197 | <a href="#">151325</a> | MYADML   | myeloid-associated differentiation marker-like                                                | <a href="#">NA</a>                                                                                                                                                          |
| A_23_P42684  | -0.5463 | 6.058 | -12.03 | 2.34E-06 | 0.0001365 | 7.207 | <a href="#">55025</a>  | FLJ20712 | hypothetical FLJ20712                                                                         | <a href="#">NA</a>                                                                                                                                                          |
| A_24_P121271 | -0.3995 | 9.071 | -12.04 | 2.33E-06 | 0.0001363 | 7.215 | <a href="#">11052</a>  | CPSF6    | cleavage and polyadenylation specific factor 6 68kDa                                          | <a href="#">ENSG00000111605</a>                                                                                                                                             |
| A_23_P143089 | -0.678  | 7.857 | -12.06 | 2.30E-06 | 0.0001351 | 7.226 | <a href="#">4358</a>   | MPV17    | MpV17 mitochondrial inner membrane protein                                                    | <a href="#">ENSG00000115204</a>                                                                                                                                             |
| A_23_P257863 | -0.598  | 12.31 | -12.08 | 2.26E-06 | 0.0001339 | 7.241 | <a href="#">22948</a>  | CCT5     | chaperonin containing TCP1 subunit 5 (epsilon)                                                | <a href="#">ENSG00000150753</a>                                                                                                                                             |
| A_23_P434421 | -0.9521 | 8.304 | -12.1  | 2.25E-06 | 0.0001334 | 7.248 | <a href="#">219771</a> | CCNY     | cyclin Y                                                                                      | <a href="#">ENSG00000108100</a>                                                                                                                                             |
| A_23_P9591   | -1.161  | 12.58 | -12.1  | 2.25E-06 | 0.0001334 | 7.248 | <a href="#">10960</a>  | LMAN2    | lectin mannose-binding 2                                                                      | <a href="#">ENSG00000169223</a>                                                                                                                                             |
| A_23_P120839 | -0.5611 | 8.492 | -12.11 | 2.22E-06 | 0.0001326 | 7.259 | <a href="#">24144</a>  | TFIP11   | tuftelin interacting protein 11                                                               | <a href="#">ENSG00000100109</a>                                                                                                                                             |
| A_23_P7083   | -0.6217 | 6.967 | -12.13 | 2.20E-06 | 0.000132  | 7.269 | <a href="#">92070</a>  | C4orf42  | chromosome 4 open reading frame 42                                                            | <a href="#">ENSG00000196810</a>                                                                                                                                             |
| A_23_P138461 | -0.9641 | 7.11  | -12.14 | 2.19E-06 | 0.0001317 | 7.272 | <a href="#">56652</a>  | C10orf2  | chromosome 10 open reading frame 2                                                            | <a href="#">ENSG00000107815</a>                                                                                                                                             |
| A_23_P53015  | -0.9194 | 7.639 | -12.15 | 2.18E-06 | 0.0001314 | 7.278 | <a href="#">64852</a>  | TUT1     | terminal uridylyl transferase 1 U6 snRNA-specific                                             | <a href="#">ENSG00000149016</a>                                                                                                                                             |
| A_23_P364890 | -1.186  | 7.899 | -12.17 | 2.14E-06 | 0.000131  | 7.294 | <a href="#">9810</a>   | RNF40    | ring finger protein 40                                                                        | <a href="#">ENSG00000103549</a>                                                                                                                                             |
| A_23_P140725 | -0.4372 | 7.143 | -12.19 | 2.12E-06 | 0.0001306 | 7.306 | <a href="#">9742</a>   | IFT140   | intraflagellar transport 140 homolog (Chlamydomonas)                                          | <a href="#">ENSG00000187535</a>                                                                                                                                             |
| A_23_P363954 | -0.8861 | 5.978 | -12.19 | 2.12E-06 | 0.0001306 | 7.305 | <a href="#">7069</a>   | THRSP    | thyroid hormone responsive (SPOT14 homolog rat)                                               | <a href="#">ENSG00000151365</a>                                                                                                                                             |
| A_24_P242820 | -0.4959 | 8.078 | -12.19 | 2.13E-06 | 0.0001308 | 7.302 | <a href="#">7247</a>   | TSN      | translin                                                                                      | <a href="#">ENSG00000211460</a>                                                                                                                                             |
| A_23_P257057 | -0.6705 | 8.841 | -12.2  | 2.11E-06 | 0.0001303 | 7.309 | <a href="#">51337</a>  | C8orf55  | chromosome 8 open reading frame 55                                                            | <a href="#">ENSG00000130193</a>                                                                                                                                             |
| A_23_P162807 | -0.6014 | 8.855 | -12.21 | 2.10E-06 | 0.0001297 | 7.315 | <a href="#">10240</a>  | MRPS31   | mitochondrial ribosomal protein S31                                                           | <a href="#">ENSG00000102738</a>                                                                                                                                             |
| A_24_P343255 | -0.6288 | 7.018 | -12.21 | 2.10E-06 | 0.0001297 | 7.316 | <a href="#">116138</a> | KLHDC3   | kelch domain containing 3                                                                     | <a href="#">ENSG00000124702</a>                                                                                                                                             |
| A_23_P107661 | -1.258  | 10.12 | -12.24 | 2.06E-06 | 0.0001284 | 7.333 | <a href="#">5518</a>   | PPP2R1A  | protein phosphatase 2 (formerly 2A) regulatory subunit A alpha isoform                        | <a href="#">ENSG00000105568</a>                                                                                                                                             |
| A_23_P117778 | -0.8116 | 7.975 | -12.27 | 2.02E-06 | 0.0001271 | 7.349 | <a href="#">84993</a>  | UBL7     | ubiquitin-like 7 (bone marrow stromal cell-derived)                                           | <a href="#">ENSG00000138629</a>                                                                                                                                             |
| A_23_P116679 | -0.7616 | 9.056 | -12.28 | 2.01E-06 | 0.0001266 | 7.358 | <a href="#">5036</a>   | PA2G4    | proliferation-associated 2G4 38kDa                                                            | <a href="#">ENSG00000170515</a>                                                                                                                                             |
| A_23_P214603 | -0.569  | 10.41 | -12.28 | 2.01E-06 | 0.0001266 | 7.356 | <a href="#">10211</a>  | FLOT1    | flotillin 1                                                                                   | <a href="#">ENSG00000137312</a><br><a href="#">ENSG00000206379</a><br><a href="#">ENSG00000206480</a><br><a href="#">ENSG00000230143</a><br><a href="#">ENSG00000232280</a> |
| A_23_P13425  | -0.5176 | 10.94 | -12.29 | 2.00E-06 | 0.0001266 | 7.361 | <a href="#">975</a>    | CD81     | CD81 molecule                                                                                 | <a href="#">ENSG00000110651</a>                                                                                                                                             |
| A_23_P425516 | -0.5177 | 6.373 | -12.29 | 1.99E-06 | 0.0001266 | 7.364 | <a href="#">26262</a>  | TSPAN17  | tetraspanin 17                                                                                | <a href="#">ENSG00000048140</a>                                                                                                                                             |

|              |         |       |        |          |           |       |                        |           |                                                                                             |                                    |
|--------------|---------|-------|--------|----------|-----------|-------|------------------------|-----------|---------------------------------------------------------------------------------------------|------------------------------------|
| A_23_P91293  | -0.6529 | 7.72  | -12.31 | 1.97E-06 | 0.0001261 | 7.376 | <a href="#">9217</a>   | VAPB      | VAMP (vesicle-associated membrane protein)-associated protein B and C                       | <a href="#">ENSG00000124164</a>    |
| A_24_P413437 | -0.9954 | 11.48 | -12.31 | 1.97E-06 | 0.0001261 | 7.376 | <a href="#">4841</a>   | NONO      | non-POU domain containing octamer-binding                                                   | <a href="#">ENSG00000147140</a>    |
| A_32_P139079 | -0.974  | 12.52 | -12.31 | 1.97E-06 | 0.0001263 | 7.373 | <a href="#">26135</a>  | SERBP1    | SERPINE1 mRNA binding protein 1                                                             | <a href="#">ENSG00000142864</a>    |
| A_23_P67971  | -0.6559 | 8.306 | -12.37 | 1.89E-06 | 0.0001236 | 7.413 | <a href="#">130589</a> | GALM      | galactose mutarotase (aldose 1-epimerase)                                                   | <a href="#">ENSG00000143891</a>    |
| A_23_P77833  | -0.6331 | 6.958 | -12.38 | 1.89E-06 | 0.0001236 | 7.416 | <a href="#">9489</a>   | PGS1      | phosphatidylglycerophosphate synthase 1                                                     | <a href="#">ENSG00000087157</a>    |
| A_24_P99639  | -0.4611 | 6.036 | -12.38 | 1.89E-06 | 0.0001236 | 7.418 | <a href="#">284086</a> | NEK8      | NIMA (never in mitosis gene a)- related kinase 8                                            | <a href="#">ENSG00000160602</a>    |
| A_24_P38944  | -0.9449 | 8.764 | -12.4  | 1.86E-06 | 0.0001229 | 7.431 | <a href="#">79080</a>  | CCDC86    | coiled-coil domain containing 86                                                            | <a href="#">ENSG00000110104</a>    |
| A_24_P303974 | -0.7187 | 8.686 | -12.44 | 1.82E-06 | 0.0001203 | 7.453 | <a href="#">8872</a>   | CDC123    | cell division cycle 123 homolog (S. cerevisiae)                                             | <a href="#">ENSG00000151465</a>    |
| A_23_P99260  | -0.7327 | 12.58 | -12.45 | 1.81E-06 | 0.0001202 | 7.455 | <a href="#">10988</a>  | METAP2    | methionyl aminopeptidase 2                                                                  | <a href="#">ENSG00000111142</a>    |
| A_24_P818005 | -0.5645 | 8.256 | -12.48 | 1.78E-06 | 0.0001183 | 7.475 | <a href="#">79089</a>  | TMUB2     | transmembrane and ubiquitin-like domain containing 2                                        | <a href="#">ENSG00000168591</a>    |
| A_23_P3450   | -0.5263 | 6.674 | -12.5  | 1.75E-06 | 0.000117  | 7.487 | <a href="#">27229</a>  | TUBGCP4   | tubulin gamma complex associated protein 4                                                  | <a href="#">ENSG00000137822</a>    |
| A_32_P162338 | -0.7105 | 11.24 | -12.5  | 1.75E-06 | 0.000117  | 7.487 | <a href="#">7170</a>   | TPM3      | tropomyosin 3                                                                               | <a href="#">ENSG00000143549</a>    |
| A_23_P88249  | -0.8778 | 7.921 | -12.51 | 1.75E-06 | 0.000117  | 7.491 | <a href="#">55147</a>  | RBM23     | RNA binding motif protein 23                                                                | <a href="#">ENSG00000100461</a>    |
| A_32_P22622  | -0.555  | 7.043 | -12.52 | 1.74E-06 | 0.0001167 | 7.497 | <a href="#">8602</a>   | NOP14     | NOP14 nucleolar protein homolog (yeast)                                                     | <a href="#">ENSG00000087269</a>    |
| A_32_P213389 | -0.8819 | 6.704 | -12.53 | 1.72E-06 | 0.000116  | 7.506 | <a href="#">7259</a>   | TSPYL1    | TSPY-like 1                                                                                 | <a href="#">ENSG00000189241</a>    |
| A_23_P16139  | -0.7388 | 7.747 | -12.54 | 1.72E-06 | 0.0001159 | 7.508 | <a href="#">10523</a>  | CHERP     | calcium homeostasis endoplasmic reticulum protein                                           | <a href="#">ENSG00000085872</a>    |
| A_23_P108604 | -0.8368 | 10.41 | -12.56 | 1.69E-06 | 0.0001147 | 7.524 | <a href="#">9448</a>   | MAP4K4    | mitogen-activated protein kinase kinase kinase 4                                            | <a href="#">ENSG00000071054</a>    |
| A_24_P39454  | -1.414  | 6.993 | -12.58 | 1.67E-06 | 0.0001137 | 7.535 | <a href="#">54617</a>  | INO80     | INO80 homolog (S. cerevisiae)                                                               | <a href="#">ENSG00000128908</a>    |
| A_23_P68087  | -0.4835 | 10.29 | -12.59 | 1.66E-06 | 0.0001137 | 7.538 | <a href="#">471</a>    | ATIC      | 5-aminoimidazole-4-carboxamide ribonucleotide formyltransferase/IMP cyclohydrolase          | <a href="#">ENSG00000138363</a>    |
| A_23_P132248 | -0.5313 | 7.592 | -12.63 | 1.62E-06 | 0.0001115 | 7.564 | <a href="#">55954</a>  | ZMAT5     | zinc finger matrin type 5                                                                   | <a href="#">ENSG00000100319</a>    |
| A_23_P7361   | -0.7997 | 8.177 | -12.63 | 1.62E-06 | 0.0001115 | 7.562 | <a href="#">79071</a>  | ELOVL6    | ELOVL family member 6 elongation of long chain fatty acids (FEN1/Elo2 SUR4/Elo3-like yeast) | <a href="#">ENSG00000170522</a>    |
| A_23_P56213  | -1.148  | 7.203 | -12.65 | 1.60E-06 | 0.0001107 | 7.575 | <a href="#">57655</a>  | GRAMD1A   | GRAM domain containing 1A                                                                   | <a href="#">ENSG00000089351</a>    |
| A_24_P294719 | -0.4709 | 6.131 | -12.65 | 1.61E-06 | 0.0001109 | 7.572 | <a href="#">23197</a>  | FAF2      | Fas associated factor family member 2                                                       | <a href="#">ENSG00000113194</a>    |
| A_23_P1199   | -0.4713 | 11.25 | -12.67 | 1.58E-06 | 0.0001103 | 7.586 | <a href="#">11164</a>  | NUDT5     | nudix (nucleoside diphosphate linked moiety X)-type motif 5                                 | <a href="#">ENSG00000165609</a>    |
| A_32_P113436 | -0.6948 | 6.121 | -12.69 | 1.57E-06 | 0.0001098 | 7.595 | <a href="#">144983</a> | HNRNPA1L2 | heterogeneous nuclear ribonucleoprotein A1-like 2                                           | ENSG00000139675<br>ENSG00000242466 |
| A_24_P276703 | -0.6917 | 9.633 | -12.71 | 1.55E-06 | 0.0001091 | 7.609 | <a href="#">23435</a>  | TARDBP    | TAR DNA binding protein                                                                     | <a href="#">ENSG00000120948</a>    |
| A_24_P29401  | -0.5201 | 6.15  | -12.75 | 1.51E-06 | 0.0001077 | 7.629 | <a href="#">5295</a>   | PIK3R1    | phosphoinositide-3-kinase regulatory subunit 1 (alpha)                                      | <a href="#">ENSG00000145675</a>    |
| A_24_P332971 | -0.5775 | 8.927 | -12.77 | 1.50E-06 | 0.0001067 | 7.64  | <a href="#">285855</a> | RPL7L1    | ribosomal protein L7-like 1                                                                 | <a href="#">ENSG00000146223</a>    |
| A_24_P338145 | -0.4513 | 9.848 | -12.83 | 1.44E-06 | 0.0001034 | 7.677 | <a href="#">30968</a>  | STOML2    | stomatin (EPB72)-like 2                                                                     | <a href="#">ENSG00000165283</a>    |
| A_23_P1280   | -0.5656 | 8.137 | -12.86 | 1.42E-06 | 0.0001023 | 7.69  | <a href="#">51008</a>  | ASCC1     | activating signal cointegrator 1 complex subunit 1                                          | <a href="#">ENSG00000138303</a>    |

|              |         |       |        |          |           |       |                        |           |                                                            |                                 |
|--------------|---------|-------|--------|----------|-----------|-------|------------------------|-----------|------------------------------------------------------------|---------------------------------|
| A_23_P138693 | -0.7069 | 7.597 | -12.87 | 1.41E-06 | 0.0001019 | 7.697 | <a href="#">9397</a>   | NMT2      | N-myristoyltransferase 2                                   | <a href="#">ENSG00000152465</a> |
| A_24_P3973   | -1.183  | 7.421 | -12.87 | 1.40E-06 | 0.0001018 | 7.7   | <a href="#">3181</a>   | HNRNPA2B1 | heterogeneous nuclear ribonucleoprotein A2/B1              | <a href="#">ENSG00000122566</a> |
| A_23_P101655 | -0.6323 | 10.36 | -12.9  | 1.38E-06 | 0.0001008 | 7.717 | <a href="#">81</a>     | ACTN4     | actinin alpha 4                                            | <a href="#">ENSG00000130402</a> |
| A_23_P118690 | -0.589  | 8.182 | -12.9  | 1.39E-06 | 0.0001009 | 7.712 | <a href="#">7756</a>   | ZNF207    | zinc finger protein 207                                    | <a href="#">ENSG00000010244</a> |
| A_23_P207766 | -0.4682 | 9.445 | -12.95 | 1.34E-06 | 9.89E-05  | 7.741 | <a href="#">396</a>    | ARHGDI A  | Rho GDP dissociation inhibitor (GDI) alpha                 | <a href="#">ENSG00000141522</a> |
| A_23_P201086 | -1.544  | 7.417 | -12.96 | 1.34E-06 | 9.85E-05  | 7.748 | <a href="#">375</a>    | ARF1      | ADP-ribosylation factor 1                                  | <a href="#">ENSG00000143761</a> |
| A_23_P2077   | -1.299  | 6.24  | -12.96 | 1.33E-06 | 9.85E-05  | 7.749 | <a href="#">256144</a> | OR4C3     | olfactory receptor family 4 subfamily C member 3           | <a href="#">ENSG00000176547</a> |
| A_23_P49082  | -0.7345 | 10.39 | -12.96 | 1.34E-06 | 9.85E-05  | 7.748 | <a href="#">10101</a>  | NUBP2     | nucleotide binding protein 2 (MinD homolog E. coli)        | <a href="#">ENSG00000095906</a> |
| A_23_P10870  | -0.512  | 8.1   | -12.98 | 1.32E-06 | 9.81E-05  | 7.758 | <a href="#">22845</a>  | DOLK      | dolichol kinase                                            | <a href="#">ENSG00000175283</a> |
| A_24_P313756 | -0.7156 | 10.91 | -12.99 | 1.31E-06 | 9.79E-05  | 7.763 | <a href="#">84617</a>  | TUBB6     | tubulin beta 6                                             | <a href="#">ENSG00000176014</a> |
| A_23_P210886 | -0.8085 | 8.225 | -13.03 | 1.28E-06 | 9.64E-05  | 7.786 | <a href="#">598</a>    | BCL2L1    | BCL2-like 1                                                | <a href="#">ENSG00000171552</a> |
| A_23_P19061  | -0.5348 | 6.452 | -13.05 | 1.27E-06 | 9.54E-05  | 7.799 | <a href="#">92181</a>  | UBTD2     | ubiquitin domain containing 2                              | <a href="#">ENSG00000168246</a> |
| A_24_P269006 | -0.5836 | 7.149 | -13.05 | 1.27E-06 | 9.54E-05  | 7.799 | <a href="#">501</a>    | ALDH7A1   | aldehyde dehydrogenase 7 family member A1                  | <a href="#">ENSG00000164904</a> |
| A_32_P38145  | -0.975  | 8.771 | -13.05 | 1.27E-06 | 9.56E-05  | 7.795 | <a href="#">11252</a>  | PAC SIN2  | protein kinase C and casein kinase substrate in neurons 2  | <a href="#">ENSG00000100266</a> |
| A_23_P202696 | -0.5462 | 6.622 | -13.06 | 1.26E-06 | 9.53E-05  | 7.805 | <a href="#">55709</a>  | KBTBD4    | kelch repeat and BTB (POZ) domain containing 4             | <a href="#">ENSG00000123444</a> |
| A_23_P124927 | -0.4985 | 8.64  | -13.07 | 1.25E-06 | 9.53E-05  | 7.807 | <a href="#">10636</a>  | RGS14     | regulator of G-protein signaling 14                        | <a href="#">ENSG00000169220</a> |
| A_24_P237766 | -0.5663 | 6.798 | -13.08 | 1.24E-06 | 9.47E-05  | 7.816 | <a href="#">6397</a>   | SEC14L1   | SEC14-like 1 (S. cerevisiae)                               | <a href="#">ENSG00000129657</a> |
| A_23_P23575  | -0.8649 | 11.15 | -13.1  | 1.23E-06 | 9.41E-05  | 7.823 | <a href="#">27173</a>  | SLC39A1   | solute carrier family 39 (zinc transporter) member 1       | <a href="#">ENSG00000143570</a> |
| A_23_P66872  | -0.5762 | 9.743 | -13.1  | 1.23E-06 | 9.41E-05  | 7.825 | <a href="#">50628</a>  | GEMIN4    | gem (nuclear organelle) associated protein 4               | <a href="#">ENSG00000179409</a> |
| A_23_P60537  | -0.6245 | 8.207 | -13.14 | 1.20E-06 | 9.26E-05  | 7.847 | <a href="#">9128</a>   | PRPF4     | PRP4 pre-mRNA processing factor 4 homolog (yeast)          | <a href="#">ENSG00000136875</a> |
| A_23_P20683  | -0.5323 | 9.427 | -13.18 | 1.18E-06 | 9.18E-05  | 7.867 | <a href="#">9933</a>   | KIAA0020  | KIAA0020                                                   | <a href="#">ENSG00000080608</a> |
| A_23_P64650  | -0.5455 | 11.03 | -13.18 | 1.18E-06 | 9.18E-05  | 7.867 | <a href="#">10102</a>  | TSFM      | Ts translation elongation factor mitochondrial             | <a href="#">ENSG00000123297</a> |
| A_24_P942945 | -0.5439 | 6.363 | -13.18 | 1.18E-06 | 9.18E-05  | 7.867 | <a href="#">57211</a>  | GPR126    | G protein-coupled receptor 126                             | <a href="#">ENSG00000112414</a> |
| A_24_P297078 | -0.5051 | 7.052 | -13.2  | 1.16E-06 | 9.11E-05  | 7.881 | <a href="#">57136</a>  | C20orf3   | chromosome 20 open reading frame 3                         | <a href="#">ENSG00000101474</a> |
| A_24_P64329  | -1.234  | 8.864 | -13.22 | 1.14E-06 | 9.07E-05  | 7.893 | <a href="#">282974</a> | STK32C    | serine/threonine kinase 32C                                | <a href="#">ENSG00000165752</a> |
| A_24_P258051 | -0.7133 | 7.449 | -13.23 | 1.14E-06 | 9.06E-05  | 7.898 | <a href="#">84930</a>  | MASTL     | microtubule associated serine/threonine kinase-like        | <a href="#">ENSG00000120539</a> |
| A_23_P143190 | -1.278  | 10.5  | -13.28 | 1.11E-06 | 8.87E-05  | 7.922 | <a href="#">4605</a>   | MYBL2     | v-myb myeloblastosis viral oncogene homolog (avian)-like 2 | <a href="#">ENSG00000101057</a> |
| A_23_P353056 | -0.4393 | 9.825 | -13.3  | 1.10E-06 | 8.82E-05  | 7.932 | <a href="#">9854</a>   | C2CD2L    | C2CD2-like                                                 | <a href="#">ENSG00000172375</a> |
| A_23_P414269 | -1.224  | 7.613 | -13.3  | 1.10E-06 | 8.82E-05  | 7.934 | <a href="#">90121</a>  | TSR2      | TSR2 20S rRNA accumulation homolog (S. cerevisiae)         | <a href="#">ENSG00000158526</a> |
| A_24_P163477 | -0.5945 | 7.27  | -13.3  | 1.09E-06 | 8.82E-05  | 7.936 | <a href="#">55278</a>  | QRSL1     | glutamyl-tRNA synthase (glutamine-hydrolyzing)-like 1      | <a href="#">ENSG00000130348</a> |
| A_24_P233960 | -0.7302 | 9.227 | -13.31 | 1.09E-06 | 8.82E-05  | 7.938 | <a href="#">81609</a>  | SNX27     | sorting nexin family member 27                             | <a href="#">ENSG00000143376</a> |

|              |         |       |        |          |          |       |                        |           |                                                                                               |                                                                    |
|--------------|---------|-------|--------|----------|----------|-------|------------------------|-----------|-----------------------------------------------------------------------------------------------|--------------------------------------------------------------------|
| A_24_P254285 | -0.6487 | 7.61  | -13.31 | 1.09E-06 | 8.81E-05 | 7.942 | <a href="#">92667</a>  | C20orf72  | chromosome 20 open reading frame 72                                                           | <a href="#">ENSG00000125871</a>                                    |
| A_23_P15466  | -0.8415 | 8.406 | -13.33 | 1.08E-06 | 8.75E-05 | 7.952 | <a href="#">6341</a>   | SCO1      | SCO cytochrome oxidase deficient homolog 1 (yeast)                                            | <a href="#">ENSG00000133028</a>                                    |
| A_23_P77430  | -0.4375 | 11.43 | -13.34 | 1.07E-06 | 8.72E-05 | 7.957 | <a href="#">54496</a>  | PRMT7     | protein arginine methyltransferase 7                                                          | <a href="#">ENSG00000132600</a>                                    |
| A_23_P103837 | -0.6182 | 8.681 | -13.35 | 1.07E-06 | 8.72E-05 | 7.961 | <a href="#">9898</a>   | UBAP2L    | ubiquitin associated protein 2-like                                                           | <a href="#">ENSG00000143569</a>                                    |
| A_24_P225961 | -1.188  | 7.352 | -13.37 | 1.05E-06 | 8.68E-05 | 7.974 | <a href="#">1605</a>   | DAG1      | dystroglycan 1 (dystrophin-associated glycoprotein 1)                                         | <a href="#">ENSG00000173402</a>                                    |
| A_23_P332340 | -0.5844 | 5.861 | -13.38 | 1.05E-06 | 8.68E-05 | 7.976 | <a href="#">283385</a> | MORN3     | MORN repeat containing 3                                                                      | <a href="#">ENSG00000139714</a>                                    |
| A_24_P382637 | -0.6853 | 7.13  | -13.39 | 1.04E-06 | 8.68E-05 | 7.98  | <a href="#">26164</a>  | GTPBP5    | GTP binding protein 5 (putative)                                                              | <a href="#">ENSG00000101181</a>                                    |
| A_23_P39656  | -0.4994 | 7.837 | -13.41 | 1.03E-06 | 8.63E-05 | 7.992 | <a href="#">64320</a>  | RNF25     | ring finger protein 25                                                                        | <a href="#">ENSG00000163481</a>                                    |
| A_24_P157388 | -0.9427 | 6.578 | -13.43 | 1.02E-06 | 8.54E-05 | 8.004 | <a href="#">55573</a>  | CDV3      | CDV3 homolog (mouse)                                                                          | <a href="#">ENSG00000091527</a>                                    |
| A_23_P118038 | -0.8572 | 10.35 | -13.5  | 9.79E-07 | 8.36E-05 | 8.04  | <a href="#">10204</a>  | NUTF2     | nuclear transport factor 2                                                                    | <a href="#">ENSG00000102898</a>                                    |
| A_23_P9416   | -0.4877 | 10.47 | -13.52 | 9.66E-07 | 8.28E-05 | 8.053 | <a href="#">48</a>     | ACO1      | aconitase 1 soluble                                                                           | <a href="#">ENSG00000122729</a>                                    |
| A_23_P102517 | -0.7206 | 7.493 | -13.54 | 9.59E-07 | 8.24E-05 | 8.06  | <a href="#">5147</a>   | PDE6D     | phosphodiesterase 6D cGMP-specific rod delta                                                  | <a href="#">ENSG00000156973</a>                                    |
| A_23_P133227 | -0.4858 | 9.532 | -13.55 | 9.50E-07 | 8.18E-05 | 8.069 | <a href="#">3035</a>   | HARS      | histidyl-tRNA synthetase                                                                      | <a href="#">ENSG00000170445</a>                                    |
| A_23_P17307  | -0.7401 | 11.99 | -13.56 | 9.45E-07 | 8.15E-05 | 8.073 | <a href="#">55257</a>  | C20orf20  | chromosome 20 open reading frame 20                                                           | <a href="#">ENSG00000101189</a>                                    |
| A_23_P25141  | -0.5599 | 7.407 | -13.59 | 9.33E-07 | 8.08E-05 | 8.086 | <a href="#">55832</a>  | CAND1     | cullin-associated and neddylation-dissociated 1                                               | <a href="#">ENSG00000111530</a>                                    |
| A_23_P135364 | -0.923  | 8.509 | -13.69 | 8.80E-07 | 7.77E-05 | 8.14  | <a href="#">1841</a>   | DTYMK     | deoxythymidylate kinase (thymidylate kinase)                                                  | <a href="#">ENSG00000168393</a>                                    |
| A_23_P251927 | -1.272  | 8.282 | -13.72 | 8.66E-07 | 7.70E-05 | 8.155 | <a href="#">54927</a>  | CHCHD3    | coiled-coil-helix-coiled-coil-helix domain containing 3                                       | <a href="#">ENSG00000106554</a>                                    |
| A_32_P165112 | -0.5754 | 7.978 | -13.76 | 8.47E-07 | 7.55E-05 | 8.176 | <a href="#">116143</a> | WDR92     | WD repeat domain 92                                                                           | <a href="#">ENSG00000221823</a><br><a href="#">ENSG00000243667</a> |
| A_23_P126057 | -0.4327 | 10.56 | -13.77 | 8.40E-07 | 7.50E-05 | 8.183 | <a href="#">6342</a>   | SCP2      | sterol carrier protein 2                                                                      | <a href="#">ENSG00000116171</a>                                    |
| A_23_P14083  | -0.6569 | 9.909 | -13.79 | 8.33E-07 | 7.47E-05 | 8.191 | <a href="#">347902</a> | AMIGO2    | adhesion molecule with Ig-like domain 2                                                       | <a href="#">ENSG00000139211</a>                                    |
| A_23_P82068  | -1.029  | 11.35 | -13.8  | 8.26E-07 | 7.45E-05 | 8.199 | <a href="#">51406</a>  | NOL7      | nucleolar protein 7 27kDa                                                                     | <a href="#">ENSG00000225921</a>                                    |
| A_23_P59836  | -0.6369 | 6.536 | -13.82 | 8.20E-07 | 7.44E-05 | 8.206 | <a href="#">55798</a>  | METTL2B   | methyltransferase like 2B                                                                     | <a href="#">ENSG00000165055</a>                                    |
| A_23_P422193 | -0.9924 | 7.495 | -13.84 | 8.12E-07 | 7.42E-05 | 8.216 | <a href="#">6839</a>   | SUV39H1   | suppressor of variegation 3-9 homolog 1 (Drosophila)                                          | <a href="#">ENSG00000101945</a>                                    |
| A_23_P92132  | -0.7561 | 10.11 | -13.84 | 8.09E-07 | 7.42E-05 | 8.218 | <a href="#">7866</a>   | IFRD2     | interferon-related developmental regulator 2                                                  | <a href="#">ENSG00000214706</a>                                    |
| A_23_P83453  | -1.119  | 8.583 | -13.85 | 8.06E-07 | 7.42E-05 | 8.222 | <a href="#">6599</a>   | SMARCC1   | SWI/SNF related matrix associated actin dependent regulator of chromatin subfamily c member 1 | <a href="#">ENSG00000173473</a>                                    |
| A_23_P23221  | -1.017  | 10.22 | -13.88 | 7.92E-07 | 7.39E-05 | 8.238 | <a href="#">1647</a>   | GADD45A   | growth arrest and DNA-damage-inducible alpha                                                  | <a href="#">ENSG00000116717</a>                                    |
| A_23_P30377  | -0.5806 | 8.042 | -13.94 | 7.68E-07 | 7.27E-05 | 8.267 | <a href="#">9879</a>   | DDX46     | DEAD (Asp-Glu-Ala-Asp) box polypeptide 46                                                     | <a href="#">ENSG00000145833</a>                                    |
| A_23_P160283 | -0.5666 | 7.15  | -13.97 | 7.56E-07 | 7.20E-05 | 8.282 | <a href="#">27252</a>  | KLHL20    | kelch-like 20 (Drosophila)                                                                    | <a href="#">ENSG00000076321</a>                                    |
| A_23_P165355 | -0.7797 | 8.027 | -13.99 | 7.46E-07 | 7.17E-05 | 8.294 | <a href="#">10056</a>  | FARSB     | phenylalanyl-tRNA synthetase beta subunit                                                     | <a href="#">ENSG00000116120</a>                                    |
| A_23_P54834  | -0.6541 | 8.91  | -14.01 | 7.40E-07 | 7.15E-05 | 8.302 | <a href="#">51388</a>  | NIP7      | nuclear import 7 homolog (S. cerevisiae)                                                      | <a href="#">ENSG00000132603</a>                                    |
| A_23_P136805 | -0.8327 | 7.817 | -14.04 | 7.25E-07 | 7.06E-05 | 8.321 | <a href="#">9824</a>   | ARHGAP11A | Rho GTPase activating protein 11A                                                             | <a href="#">ENSG00000198826</a>                                    |



|              |         |       |        |          |          |       |                        |          |                                                                                                       |                                                                    |
|--------------|---------|-------|--------|----------|----------|-------|------------------------|----------|-------------------------------------------------------------------------------------------------------|--------------------------------------------------------------------|
| A_23_P97906  | -0.6855 | 8.375 | -14.05 | 7.21E-07 | 7.05E-05 | 8.326 | <a href="#">22978</a>  | NT5C2    | 5'-nucleotidase cytosolic II                                                                          | <a href="#">ENSG00000076685</a>                                    |
| A_24_P100517 | -0.9002 | 8.689 | -14.06 | 7.16E-07 | 7.05E-05 | 8.332 | <a href="#">89958</a>  | C9orf140 | chromosome 9 open reading frame 140                                                                   | <a href="#">ENSG00000186193</a>                                    |
| A_32_P135902 | -0.6686 | 6.696 | -14.06 | 7.20E-07 | 7.05E-05 | 8.327 | <a href="#">1973</a>   | EIF4A1   | eukaryotic translation initiation factor 4A1                                                          | <a href="#">ENSG00000161960</a>                                    |
| A_23_P203344 | -0.6246 | 8.397 | -14.09 | 7.08E-07 | 7.00E-05 | 8.343 | <a href="#">80829</a>  | ZFP91    | zinc finger protein 91 homolog (mouse)                                                                | <a href="#">ENSG00000186660</a>                                    |
| A_24_P232252 | -0.57   | 5.923 | -14.09 | 7.08E-07 | 7.00E-05 | 8.342 | <a href="#">6505</a>   | SLC1A1   | solute carrier family 1 (neuronal/epithelial high affinity glutamate transporter system Xag) member 1 | <a href="#">ENSG00000106688</a>                                    |
| A_32_P132796 | -0.8174 | 7.776 | -14.1  | 7.01E-07 | 6.97E-05 | 8.351 | <a href="#">9577</a>   | BRE      | brain and reproductive organ-expressed (TNFRSF1A modulator)                                           | <a href="#">ENSG00000158019</a>                                    |
| A_32_P63182  | -0.658  | 8.402 | -14.1  | 7.03E-07 | 6.97E-05 | 8.35  | <a href="#">2923</a>   | PDIA3    | protein disulfide isomerase family A member 3                                                         | <a href="#">ENSG00000167004</a>                                    |
| A_24_P144504 | -0.8063 | 6.948 | -14.12 | 6.95E-07 | 6.97E-05 | 8.359 | <a href="#">79184</a>  | BRCC3    | BRCA1/BRCA2-containing complex subunit 3                                                              | <a href="#">ENSG00000185515</a>                                    |
| A_23_P402610 | -1.015  | 6.695 | -14.15 | 6.83E-07 | 6.91E-05 | 8.375 | <a href="#">5198</a>   | PFAS     | phosphoribosylformylglycinamidine synthase                                                            | <a href="#">ENSG00000178921</a>                                    |
| A_24_P205364 | -1.26   | 7.448 | -14.15 | 6.86E-07 | 6.92E-05 | 8.372 | <a href="#">6470</a>   | SHMT1    | serine hydroxymethyltransferase 1 (soluble)                                                           | <a href="#">ENSG00000176974</a>                                    |
| A_23_P103588 | -0.6427 | 5.804 | -14.16 | 6.79E-07 | 6.90E-05 | 8.381 | <a href="#">3158</a>   | HMGCS2   | 3-hydroxy-3-methylglutaryl-Coenzyme A synthase 2 (mitochondrial)                                      | <a href="#">ENSG00000134240</a>                                    |
| A_23_P29555  | -0.6119 | 11.09 | -14.17 | 6.77E-07 | 6.90E-05 | 8.384 | <a href="#">6396</a>   | SEC13    | SEC13 homolog (S. cerevisiae)                                                                         | <a href="#">ENSG00000157020</a>                                    |
| A_23_P39024  | -0.5836 | 8.287 | -14.18 | 6.72E-07 | 6.89E-05 | 8.391 | <a href="#">84292</a>  | WDR83    | WD repeat domain 83                                                                                   | <a href="#">ENSG00000123154</a>                                    |
| A_23_P165280 | -1.11   | 10.79 | -14.21 | 6.64E-07 | 6.82E-05 | 8.402 | <a href="#">5434</a>   | POLR2E   | polymerase (RNA) II (DNA directed) polypeptide E 25kDa                                                | <a href="#">ENSG00000099817</a>                                    |
| A_23_P46118  | -0.6675 | 7.132 | -14.21 | 6.62E-07 | 6.82E-05 | 8.405 | <a href="#">1122</a>   | CHML     | choroideremia-like (Rab escort protein 2)                                                             | <a href="#">ENSG00000203668</a>                                    |
| A_23_P374351 | -1.054  | 7     | -14.24 | 6.51E-07 | 6.76E-05 | 8.42  | <a href="#">222658</a> | KCTD20   | potassium channel tetramerisation domain containing 20                                                | <a href="#">ENSG00000112078</a>                                    |
| A_23_P7101   | -0.947  | 10.81 | -14.24 | 6.51E-07 | 6.76E-05 | 8.42  | <a href="#">7884</a>   | SLBP     | stem-loop binding protein                                                                             | <a href="#">ENSG00000163950</a>                                    |
| A_32_P199736 | -0.8069 | 6.322 | -14.24 | 6.52E-07 | 6.76E-05 | 8.419 | <a href="#">11261</a>  | CHP      | calcium binding protein P22                                                                           | <a href="#">ENSG00000187446</a>                                    |
| A_23_P38497  | -0.9325 | 9.042 | -14.26 | 6.45E-07 | 6.76E-05 | 8.429 | <a href="#">8402</a>   | SLC25A11 | solute carrier family 25 (mitochondrial carrier; oxoglutarate carrier) member 11                      | <a href="#">ENSG00000108528</a>                                    |
| A_23_P144622 | -1.636  | 8.246 | -14.27 | 6.42E-07 | 6.75E-05 | 8.432 | <a href="#">10007</a>  | GNPDA1   | glucosamine-6-phosphate deaminase 1                                                                   | <a href="#">ENSG00000113552</a>                                    |
| A_24_P389517 | -0.7648 | 10.35 | -14.27 | 6.40E-07 | 6.75E-05 | 8.436 | <a href="#">3190</a>   | HNRNPK   | heterogeneous nuclear ribonucleoprotein K                                                             | <a href="#">ENSG00000165119</a>                                    |
| A_24_P237265 | -0.6851 | 7.344 | -14.28 | 6.39E-07 | 6.75E-05 | 8.438 | <a href="#">5594</a>   | MAPK1    | mitogen-activated protein kinase 1                                                                    | <a href="#">ENSG00000100030</a>                                    |
| A_24_P280029 | -1.248  | 8.025 | -14.29 | 6.35E-07 | 6.74E-05 | 8.443 | <a href="#">57026</a>  | PDXP     | pyridoxal (pyridoxine vitamin B6) phosphatase                                                         | <a href="#">ENSG00000100092</a><br><a href="#">ENSG00000241360</a> |
| A_23_P165937 | -0.6825 | 6.714 | -14.3  | 6.30E-07 | 6.74E-05 | 8.45  | <a href="#">79980</a>  | DSN1     | DSN1 MIND kinetochore complex component homolog (S. cerevisiae)                                       | <a href="#">ENSG00000149636</a>                                    |
| A_23_P75978  | -0.4895 | 9.537 | -14.34 | 6.18E-07 | 6.65E-05 | 8.468 | <a href="#">81570</a>  | CLPB     | ClpB caseinolytic peptidase B homolog (E. coli)                                                       | <a href="#">ENSG00000162129</a>                                    |
| A_23_P502609 | -0.6488 | 9.354 | -14.36 | 6.12E-07 | 6.60E-05 | 8.477 | <a href="#">9091</a>   | PIGQ     | phosphatidylinositol glycan anchor biosynthesis class Q                                               | <a href="#">ENSG00000007541</a>                                    |
| A_23_P216355 | -0.9722 | 8.773 | -14.38 | 6.04E-07 | 6.56E-05 | 8.49  | <a href="#">4796</a>   | NFKBIL2  | nuclear factor of kappa light polypeptide gene enhancer in B-cells inhibitor-like 2                   | <a href="#">ENSG00000160949</a>                                    |
| A_23_P16573  | -1.264  | 7.933 | -14.41 | 5.96E-07 | 6.50E-05 | 8.501 | <a href="#">54555</a>  | DDX49    | DEAD (Asp-Glu-Ala-Asp) box polypeptide 49                                                             | <a href="#">ENSG00000105671</a>                                    |
| A_23_P215265 | -0.4834 | 7.79  | -14.43 | 5.90E-07 | 6.48E-05 | 8.51  | <a href="#">2768</a>   | GNA12    | guanine nucleotide binding protein (G protein) alpha 12                                               | <a href="#">ENSG00000146535</a>                                    |

|              |         |       |        |          |          |       |                       |          |                                                                                         |                                 |
|--------------|---------|-------|--------|----------|----------|-------|-----------------------|----------|-----------------------------------------------------------------------------------------|---------------------------------|
| A_23_P135769 | -0.8788 | 14.04 | -14.46 | 5.80E-07 | 6.41E-05 | 8.526 | <a href="#">60</a>    | ACTB     | actin beta                                                                              | <a href="#">ENSG00000075624</a> |
| A_24_P378368 | -0.9839 | 6.392 | -14.47 | 5.75E-07 | 6.41E-05 | 8.534 | <a href="#">8720</a>  | MBTPS1   | membrane-bound transcription factor peptidase site 1                                    | <a href="#">ENSG00000140943</a> |
| A_23_P213344 | -0.854  | 8.295 | -14.48 | 5.74E-07 | 6.41E-05 | 8.537 | <a href="#">1729</a>  | DIAPH1   | diaphanous homolog 1 (Drosophila)                                                       | <a href="#">ENSG00000131504</a> |
| A_24_P26897  | -0.4986 | 6.087 | -14.48 | 5.74E-07 | 6.41E-05 | 8.537 | <a href="#">3632</a>  | INPP5A   | inositol polyphosphate-5-phosphatase 40kDa                                              | <a href="#">ENSG00000068383</a> |
| A_24_P53519  | -0.7618 | 8.558 | -14.48 | 5.74E-07 | 6.41E-05 | 8.535 | <a href="#">10036</a> | CHAF1A   | chromatin assembly factor 1 subunit A (p150)                                            | <a href="#">ENSG00000167670</a> |
| A_23_P135499 | -0.5329 | 6.436 | -14.51 | 5.64E-07 | 6.37E-05 | 8.552 | <a href="#">25932</a> | CLIC4    | chloride intracellular channel 4                                                        | <a href="#">ENSG00000169504</a> |
| A_23_P91657  | -1.03   | 8.258 | -14.52 | 5.61E-07 | 6.36E-05 | 8.556 | <a href="#">2130</a>  | EWSR1    | Ewing sarcoma breakpoint region 1                                                       | <a href="#">ENSG00000182944</a> |
| A_23_P98898  | -0.8096 | 6.582 | -14.54 | 5.55E-07 | 6.32E-05 | 8.567 | <a href="#">1017</a>  | CDK2     | cyclin-dependent kinase 2                                                               | <a href="#">ENSG00000123374</a> |
| A_23_P208446 | -0.7159 | 9.983 | -14.55 | 5.53E-07 | 6.31E-05 | 8.571 | <a href="#">6294</a>  | SAFB     | scaffold attachment factor B                                                            | <a href="#">ENSG00000160633</a> |
| A_23_P370434 | -0.6315 | 12.09 | -14.58 | 5.45E-07 | 6.26E-05 | 8.583 | <a href="#">708</a>   | C1QBP    | complement component 1 q subcomponent binding protein                                   | <a href="#">ENSG00000108561</a> |
| A_23_P208416 | -0.8834 | 6.793 | -14.59 | 5.43E-07 | 6.26E-05 | 8.588 | <a href="#">79939</a> | SLC35E1  | solute carrier family 35 member E1                                                      | <a href="#">ENSG00000127526</a> |
| A_23_P47735  | -0.6383 | 6.519 | -14.62 | 5.33E-07 | 6.21E-05 | 8.604 | <a href="#">84957</a> | RELT     | RELT tumor necrosis factor receptor                                                     | <a href="#">ENSG00000054967</a> |
| A_23_P55064  | -0.8987 | 7.628 | -14.62 | 5.32E-07 | 6.21E-05 | 8.605 | <a href="#">55135</a> | WRAP53   | WD repeat containing antisense to TP53                                                  | <a href="#">ENSG00000141499</a> |
| A_23_P165891 | -0.6634 | 7.497 | -14.64 | 5.26E-07 | 6.17E-05 | 8.615 | <a href="#">9014</a>  | TAF1B    | TATA box binding protein (TBP)-associated factor RNA polymerase I B 63kDa               | <a href="#">ENSG00000115750</a> |
| A_24_P305597 | -0.8297 | 11.51 | -14.67 | 5.20E-07 | 6.12E-05 | 8.627 | <a href="#">11047</a> | ADRM1    | adhesion regulating molecule 1                                                          | <a href="#">ENSG00000130706</a> |
| A_23_P166122 | -0.7341 | 7.34  | -14.68 | 5.17E-07 | 6.11E-05 | 8.631 | <a href="#">10621</a> | POLR3F   | polymerase (RNA) III (DNA directed) polypeptide F 39 kDa                                | <a href="#">ENSG00000132664</a> |
| A_23_P345707 | -0.4661 | 6.474 | -14.7  | 5.12E-07 | 6.07E-05 | 8.641 | <a href="#">90381</a> | C15orf42 | chromosome 15 open reading frame 42                                                     | <a href="#">ENSG00000140534</a> |
| A_24_P63608  | -0.4969 | 11.34 | -14.7  | 5.11E-07 | 6.07E-05 | 8.642 | <a href="#">55651</a> | NHP2     | NHP2 ribonucleoprotein homolog (yeast)                                                  | <a href="#">ENSG00000145912</a> |
| A_32_P88479  | -0.4463 | 11.39 | -14.7  | 5.12E-07 | 6.07E-05 | 8.64  | <a href="#">23313</a> | C22orf9  | chromosome 22 open reading frame 9                                                      | <a href="#">ENSG00000100364</a> |
| A_23_P70045  | -0.7036 | 12.07 | -14.74 | 5.00E-07 | 5.98E-05 | 8.662 | <a href="#">9555</a>  | H2AFY    | H2A histone family member Y                                                             | <a href="#">ENSG00000113648</a> |
| A_23_P154070 | -0.4592 | 12.8  | -14.77 | 4.92E-07 | 5.94E-05 | 8.677 | <a href="#">7277</a>  | TUBA4A   | tubulin alpha 4a                                                                        | <a href="#">ENSG00000127824</a> |
| A_23_P32722  | -0.5555 | 6.478 | -14.77 | 4.92E-07 | 5.94E-05 | 8.677 | <a href="#">79797</a> | ZNF408   | zinc finger protein 408                                                                 | <a href="#">ENSG00000175213</a> |
| A_23_P152995 | -0.4879 | 5.793 | -14.79 | 4.88E-07 | 5.94E-05 | 8.685 | <a href="#">6532</a>  | SLC6A4   | solute carrier family 6 (neurotransmitter transporter serotonin) member 4               | <a href="#">ENSG00000108576</a> |
| A_23_P58353  | -0.9111 | 12.47 | -14.81 | 4.83E-07 | 5.91E-05 | 8.694 | <a href="#">3184</a>  | HNRNPD   | heterogeneous nuclear ribonucleoprotein D (AU-rich element RNA binding protein 1 37kDa) | <a href="#">ENSG00000138668</a> |
| A_23_P64010  | -0.6441 | 10.19 | -14.85 | 4.74E-07 | 5.83E-05 | 8.711 | <a href="#">23788</a> | MTCH2    | mitochondrial carrier homolog 2 (C. elegans)                                            | <a href="#">ENSG00000109919</a> |
| A_23_P102743 | -0.6808 | 6.775 | -14.93 | 4.53E-07 | 5.67E-05 | 8.752 | <a href="#">51605</a> | TRMT6    | tRNA methyltransferase 6 homolog (S. cerevisiae)                                        | <a href="#">ENSG00000089195</a> |
| A_23_P18465  | -0.6901 | 7.925 | -14.97 | 4.44E-07 | 5.61E-05 | 8.77  | <a href="#">5981</a>  | RFC1     | replication factor C (activator 1) 1 145kDa                                             | <a href="#">ENSG00000035928</a> |

|              |         |       |        |          |          |       |                        |           |                                                                   |                                                                                                                                                      |
|--------------|---------|-------|--------|----------|----------|-------|------------------------|-----------|-------------------------------------------------------------------|------------------------------------------------------------------------------------------------------------------------------------------------------|
| A_32_P78528  | -1.235  | 12.9  | -14.99 | 4.41E-07 | 5.59E-05 | 8.777 | <a href="#">203068</a> | TUBB      | tubulin beta                                                      | ENSG00000183311<br>ENSG00000196230<br>ENSG00000224156<br>ENSG00000227739<br>ENSG00000229684<br>ENSG00000232421<br>ENSG00000232575<br>ENSG00000235067 |
| A_23_P476    | -0.8259 | 7.552 | -15.03 | 4.31E-07 | 5.53E-05 | 8.798 | <a href="#">9019</a>   | MPZL1     | myelin protein zero-like 1                                        | <a href="#">ENSG00000197965</a>                                                                                                                      |
| A_23_P354170 | -1.242  | 7.45  | -15.04 | 4.28E-07 | 5.53E-05 | 8.803 | <a href="#">54965</a>  | PIGX      | phosphatidylinositol glycan anchor biosynthesis class X           | <a href="#">ENSG00000163964</a>                                                                                                                      |
| A_23_P423480 | -0.7155 | 8.676 | -15.05 | 4.28E-07 | 5.53E-05 | 8.804 | <a href="#">219743</a> | TYSND1    | trypsin domain containing 1                                       | <a href="#">ENSG00000156521</a>                                                                                                                      |
| A_32_P174790 | -0.6382 | 6.962 | -15.08 | 4.20E-07 | 5.47E-05 | 8.82  | <a href="#">439990</a> | LOC439990 | hypothetical gene supported by BC009626; BC048265                 | <a href="#">NA</a>                                                                                                                                   |
| A_23_P106708 | -0.6992 | 17.31 | -15.09 | 4.19E-07 | 5.47E-05 | 8.823 | <a href="#">6187</a>   | RPS2      | ribosomal protein S2                                              | <a href="#">ENSG00000140988</a>                                                                                                                      |
| A_24_P296424 | -0.5649 | 7.256 | -15.1  | 4.17E-07 | 5.46E-05 | 8.828 | <a href="#">1201</a>   | CLN3      | ceroid-lipofuscinosis neuronal 3                                  | <a href="#">ENSG00000188603</a>                                                                                                                      |
| A_32_P10003  | -0.6286 | 6.653 | -15.14 | 4.07E-07 | 5.42E-05 | 8.849 | <a href="#">113457</a> | TUBA3D    | tubulin alpha 3d                                                  | ENSG00000075886<br><a href="#">ENSG00000198033</a>                                                                                                   |
| A_23_P98431  | -0.6741 | 13.28 | -15.2  | 3.96E-07 | 5.33E-05 | 8.875 | <a href="#">3145</a>   | HMBS      | hydroxymethylbilane synthase                                      | <a href="#">ENSG00000149397</a>                                                                                                                      |
| A_23_P166193 | -0.554  | 7.726 | -15.21 | 3.95E-07 | 5.33E-05 | 8.877 | <a href="#">55741</a>  | EDEM2     | ER degradation enhancer mannosidase alpha-like 2                  | <a href="#">ENSG00000088298</a>                                                                                                                      |
| A_23_P95470  | -0.6587 | 9.873 | -15.21 | 3.94E-07 | 5.33E-05 | 8.877 | <a href="#">977</a>    | CD151     | CD151 molecule (Raph blood group)                                 | <a href="#">ENSG00000177697</a>                                                                                                                      |
| A_23_P5586   | -0.5881 | 9.522 | -15.24 | 3.87E-07 | 5.29E-05 | 8.894 | <a href="#">10199</a>  | MPHOSPH10 | M-phase phosphoprotein 10 (U3 small nucleolar ribonucleoprotein)  | <a href="#">ENSG00000124383</a>                                                                                                                      |
| A_23_P131771 | -0.9058 | 6.343 | -15.32 | 3.72E-07 | 5.15E-05 | 8.929 | <a href="#">7165</a>   | TPD52L2   | tumor protein D52-like 2                                          | <a href="#">ENSG00000101150</a>                                                                                                                      |
| A_32_P18824  | -0.5428 | 10.22 | -15.36 | 3.65E-07 | 5.10E-05 | 8.948 | <a href="#">29117</a>  | BRD7      | bromodomain containing 7                                          | <a href="#">ENSG00000166164</a>                                                                                                                      |
| A_32_P8666   | -0.8228 | 8.998 | -15.41 | 3.56E-07 | 5.07E-05 | 8.969 | <a href="#">644063</a> | LOC644063 | similar to heterogeneous nuclear ribonucleoprotein K              | <a href="#">NA</a>                                                                                                                                   |
| A_23_P153583 | -1.397  | 7.88  | -15.42 | 3.54E-07 | 5.06E-05 | 8.976 | <a href="#">5536</a>   | PPP5C     | protein phosphatase 5 catalytic subunit                           | <a href="#">ENSG00000011485</a>                                                                                                                      |
| A_23_P79942  | -0.713  | 9.004 | -15.43 | 3.52E-07 | 5.06E-05 | 8.979 | <a href="#">80025</a>  | PANK2     | pantothenate kinase 2                                             | <a href="#">ENSG00000125779</a>                                                                                                                      |
| A_23_P126186 | -0.8025 | 9.257 | -15.44 | 3.51E-07 | 5.06E-05 | 8.983 | <a href="#">8560</a>   | DEGS1     | degenerative spermatocyte homolog 1 lipid desaturase (Drosophila) | <a href="#">ENSG00000143753</a>                                                                                                                      |
| A_24_P130962 | -1.408  | 8.685 | -15.47 | 3.45E-07 | 5.01E-05 | 8.997 | <a href="#">64222</a>  | TOR3A     | torsin family 3 member A                                          | <a href="#">ENSG00000186283</a>                                                                                                                      |
| A_24_P313744 | -0.5232 | 10.21 | -15.54 | 3.34E-07 | 4.93E-05 | 9.027 | <a href="#">9097</a>   | USP14     | ubiquitin specific peptidase 14 (tRNA-guanine transglycosylase)   | <a href="#">ENSG00000101557</a>                                                                                                                      |
| A_23_P8380   | -0.5655 | 8.233 | -15.67 | 3.13E-07 | 4.70E-05 | 9.085 | <a href="#">78996</a>  | C7orf49   | chromosome 7 open reading frame 49                                | <a href="#">ENSG00000122783</a>                                                                                                                      |
| A_23_P105392 | -0.8402 | 12.79 | -15.69 | 3.11E-07 | 4.69E-05 | 9.092 | <a href="#">10576</a>  | CCT2      | chaperonin containing TCP1 subunit 2 (beta)                       | <a href="#">ENSG00000166226</a>                                                                                                                      |
| A_23_P130194 | -0.5349 | 13.11 | -15.69 | 3.11E-07 | 4.69E-05 | 9.091 | <a href="#">5831</a>   | PYCR1     | pyrroline-5-carboxylate reductase 1                               | <a href="#">ENSG00000183010</a>                                                                                                                      |
| A_23_P49646  | -1.004  | 8.35  | -15.75 | 3.01E-07 | 4.64E-05 | 9.121 | <a href="#">5636</a>   | PRPSAP2   | phosphoribosyl pyrophosphate synthetase-associated protein 2      | <a href="#">ENSG00000141127</a>                                                                                                                      |
| A_32_P88626  | -0.8521 | 7.417 | -15.86 | 2.86E-07 | 4.56E-05 | 9.165 | <a href="#">65979</a>  | PHACTR4   | phosphatase and actin regulator 4                                 | <a href="#">ENSG00000204138</a>                                                                                                                      |
| A_23_P55998  | -0.9411 | 9.905 | -15.88 | 2.82E-07 | 4.54E-05 | 9.176 | <a href="#">6510</a>   | SLC1A5    | solute carrier family 1 (neutral amino acid transporter) member 5 | <a href="#">ENSG00000105281</a>                                                                                                                      |
| A_23_P21436  | -1.021  | 8.933 | -16.07 | 2.59E-07 | 4.26E-05 | 9.254 | <a href="#">26147</a>  | PHF19     | PHD finger protein 19                                             | <a href="#">ENSG00000119403</a>                                                                                                                      |
| A_24_P636318 | -0.8716 | 6.928 | -16.24 | 2.38E-07 | 4.02E-05 | 9.325 | <a href="#">130074</a> | FAM168B   | family with sequence similarity 168 member B                      | <a href="#">ENSG00000152102</a>                                                                                                                      |

|              |         |       |        |          |          |       |                        |          |                                                                                          |                                 |
|--------------|---------|-------|--------|----------|----------|-------|------------------------|----------|------------------------------------------------------------------------------------------|---------------------------------|
| A_23_P3424   | -0.7556 | 9.836 | -16.28 | 2.34E-07 | 3.99E-05 | 9.342 | <a href="#">54913</a>  | RPP25    | ribonuclease P/MRP 25kDa subunit                                                         | <a href="#">ENSG00000178718</a> |
| A_23_P86917  | -0.6098 | 11.49 | -16.31 | 2.30E-07 | 3.95E-05 | 9.356 | <a href="#">8772</a>   | FADD     | Fas (TNFRSF6)-associated via death domain                                                | <a href="#">ENSG00000168040</a> |
| A_23_P83736  | -0.7256 | 8.859 | -16.39 | 2.22E-07 | 3.83E-05 | 9.39  | <a href="#">3622</a>   | ING2     | inhibitor of growth family member 2                                                      | <a href="#">ENSG00000168556</a> |
| A_23_P52978  | -1.051  | 7.736 | -16.44 | 2.17E-07 | 3.77E-05 | 9.41  | <a href="#">27339</a>  | PRPF19   | PRP19/PSO4 pre-mRNA processing factor 19 homolog (S. cerevisiae)                         | <a href="#">ENSG00000110107</a> |
| A_23_P137715 | -0.615  | 7.556 | -16.46 | 2.14E-07 | 3.75E-05 | 9.419 | <a href="#">57645</a>  | POGK     | pogo transposable element with KRAB domain                                               | <a href="#">ENSG00000143157</a> |
| A_23_P25336  | -0.9474 | 6.923 | -16.47 | 2.14E-07 | 3.75E-05 | 9.422 | <a href="#">51228</a>  | GLTP     | glycolipid transfer protein                                                              | <a href="#">ENSG00000139433</a> |
| A_23_P131723 | -0.8421 | 11.89 | -16.49 | 2.11E-07 | 3.75E-05 | 9.431 | <a href="#">10971</a>  | YWHAQ    | tyrosine 3-monooxygenase/tryptophan 5-monooxygenase activation protein theta polypeptide | <a href="#">ENSG00000134308</a> |
| A_23_P46627  | -0.6124 | 9.929 | -16.6  | 2.01E-07 | 3.65E-05 | 9.476 | <a href="#">51094</a>  | ADIPOR1  | adiponectin receptor 1                                                                   | <a href="#">ENSG00000159346</a> |
| A_23_P71014  | -0.922  | 10.64 | -16.67 | 1.95E-07 | 3.60E-05 | 9.501 | <a href="#">114049</a> | WBSCR22  | Williams Beuren syndrome chromosome region 22                                            | <a href="#">ENSG00000071462</a> |
| A_23_P17575  | -1.001  | 13.68 | -16.7  | 1.92E-07 | 3.55E-05 | 9.516 | <a href="#">191</a>    | AHCY     | adenosylhomocysteinase                                                                   | <a href="#">ENSG00000101444</a> |
| A_24_P80204  | -0.6939 | 12.84 | -16.71 | 1.91E-07 | 3.55E-05 | 9.519 | <a href="#">7851</a>   | MALL     | mal T-cell differentiation protein-like                                                  | <a href="#">ENSG00000144063</a> |
| A_23_P36129  | -0.7628 | 8.665 | -16.74 | 1.88E-07 | 3.52E-05 | 9.532 | <a href="#">26007</a>  | DAK      | dihydroxyacetone kinase 2 homolog (S. cerevisiae)                                        | <a href="#">ENSG00000149476</a> |
| A_23_P216402 | -0.7756 | 7.672 | -16.78 | 1.85E-07 | 3.47E-05 | 9.548 | <a href="#">83549</a>  | UCK1     | uridine-cytidine kinase 1                                                                | <a href="#">ENSG00000130717</a> |
| A_32_P512061 | -0.6972 | 6.787 | -16.8  | 1.84E-07 | 3.46E-05 | 9.554 | <a href="#">2630</a>   | GBAP1    | glucosidase beta acid pseudogene 1                                                       | <a href="#">NA</a>              |
| A_23_P12849  | -0.6806 | 8.337 | -16.83 | 1.80E-07 | 3.43E-05 | 9.568 | <a href="#">84893</a>  | FBXO18   | F-box protein helicase 18                                                                | <a href="#">ENSG00000134452</a> |
| A_23_P65741  | -0.5753 | 8.699 | -16.83 | 1.81E-07 | 3.43E-05 | 9.566 | <a href="#">115752</a> | DIS3L    | DIS3 mitotic control homolog (S. cerevisiae)-like                                        | <a href="#">ENSG00000166938</a> |
| A_23_P431776 | -0.771  | 7.337 | -16.85 | 1.79E-07 | 3.42E-05 | 9.575 | <a href="#">2118</a>   | ETV4     | ets variant 4                                                                            | <a href="#">ENSG00000175832</a> |
| A_23_P17773  | -1.648  | 7.071 | -16.89 | 1.76E-07 | 3.38E-05 | 9.588 | <a href="#">83606</a>  | C22orf13 | chromosome 22 open reading frame 13                                                      | <a href="#">ENSG00000138867</a> |
| A_23_P130648 | -0.7603 | 8.862 | -16.91 | 1.75E-07 | 3.38E-05 | 9.596 | <a href="#">10755</a>  | GIPC1    | GIPC PDZ domain containing family member 1                                               | <a href="#">ENSG00000123159</a> |
| A_24_P791515 | -0.5389 | 6.28  | -16.92 | 1.74E-07 | 3.38E-05 | 9.602 | <a href="#">10492</a>  | SYNCRIP  | synaptotagmin binding cytoplasmic RNA interacting protein                                | <a href="#">ENSG00000135316</a> |
| A_23_P1145   | -0.9057 | 7.861 | -17.01 | 1.67E-07 | 3.28E-05 | 9.638 | <a href="#">55149</a>  | MTPAP    | mitochondrial poly(A) polymerase                                                         | <a href="#">ENSG00000107951</a> |
| A_24_P405313 | -1.084  | 6.815 | -17.05 | 1.63E-07 | 3.27E-05 | 9.654 | <a href="#">8604</a>   | SLC25A12 | solute carrier family 25 (mitochondrial carrier Aralar) member 12                        | <a href="#">ENSG00000115840</a> |
| A_23_P138507 | -0.6146 | 7.799 | -17.06 | 1.63E-07 | 3.27E-05 | 9.657 | <a href="#">983</a>    | CDK1     | cyclin-dependent kinase 1                                                                | <a href="#">ENSG00000170312</a> |
| A_24_P353619 | -0.9833 | 6.223 | -17.1  | 1.60E-07 | 3.25E-05 | 9.671 | <a href="#">249</a>    | ALPL     | alkaline phosphatase liver/bone/kidney                                                   | <a href="#">ENSG00000162551</a> |
| A_23_P2601   | -0.5845 | 13.76 | -17.12 | 1.59E-07 | 3.25E-05 | 9.679 | <a href="#">7184</a>   | HSP90B1  | heat shock protein 90kDa beta (Grp94) member 1                                           | <a href="#">ENSG00000166598</a> |
| A_23_P134477 | -1.009  | 10.92 | -17.24 | 1.50E-07 | 3.12E-05 | 9.727 | <a href="#">84310</a>  | C7orf50  | chromosome 7 open reading frame 50                                                       | <a href="#">ENSG00000146540</a> |
| A_23_P167263 | -0.7177 | 7.564 | -17.29 | 1.47E-07 | 3.09E-05 | 9.745 | <a href="#">79960</a>  | PHF17    | PHD finger protein 17                                                                    | <a href="#">ENSG00000077684</a> |
| A_23_P113441 | -0.8938 | 6.345 | -17.32 | 1.45E-07 | 3.07E-05 | 9.756 | <a href="#">55164</a>  | SHQ1     | SHQ1 homolog (S. cerevisiae)                                                             | <a href="#">ENSG00000144736</a> |
| A_23_P171054 | -0.7949 | 6.229 | -17.33 | 1.45E-07 | 3.07E-05 | 9.759 | <a href="#">2002</a>   | ELK1     | ELK1 member of ETS oncogene family                                                       | <a href="#">ENSG00000126767</a> |
| A_23_P75453  | -0.9216 | 8.704 | -17.5  | 1.34E-07 | 2.90E-05 | 9.825 | <a href="#">4221</a>   | MEN1     | multiple endocrine neoplasia I                                                           | <a href="#">ENSG00000133895</a> |
| A_23_P416242 | -0.9537 | 6.652 | -17.54 | 1.31E-07 | 2.86E-05 | 9.841 | <a href="#">115992</a> | RNF166   | ring finger protein 166                                                                  | <a href="#">ENSG00000158717</a> |
| A_32_P194264 | -0.8042 | 7.359 | -17.59 | 1.28E-07 | 2.82E-05 | 9.86  | <a href="#">494143</a> | CHAC2    | ChaC cation transport regulator homolog 2 (E. coli)                                      | <a href="#">ENSG00000143942</a> |

|              |         |       |        |          |          |       |                        |         |                                                                                             |                                 |
|--------------|---------|-------|--------|----------|----------|-------|------------------------|---------|---------------------------------------------------------------------------------------------|---------------------------------|
| A_24_P397107 | -0.7729 | 7.861 | -17.67 | 1.24E-07 | 2.79E-05 | 9.889 | <a href="#">993</a>    | CDC25A  | cell division cycle 25 homolog A (S. pombe)                                                 | <a href="#">ENSG00000164045</a> |
| A_24_P314571 | -0.7046 | 8.471 | -17.71 | 1.22E-07 | 2.76E-05 | 9.903 | <a href="#">147841</a> | SPC24   | SPC24 NDC80 kinetochore complex component homolog (S. cerevisiae)                           | <a href="#">ENSG00000161888</a> |
| A_32_P197511 | -0.5722 | 8.905 | -17.86 | 1.14E-07 | 2.66E-05 | 9.959 | <a href="#">114984</a> | FLYWCH2 | FLYWCH family member 2                                                                      | <a href="#">ENSG00000162076</a> |
| A_23_P71146  | -1.094  | 9.282 | -17.87 | 1.14E-07 | 2.66E-05 | 9.96  | <a href="#">5425</a>   | POLD2   | polymerase (DNA directed) delta 2 regulatory subunit 50kDa                                  | <a href="#">ENSG00000106628</a> |
| A_23_P106575 | -0.673  | 10.16 | -18.02 | 1.07E-07 | 2.54E-05 | 10.02 | <a href="#">2806</a>   | GOT2    | glutamic-oxaloacetic transaminase 2 mitochondrial (aspartate aminotransferase 2)            | <a href="#">ENSG00000125166</a> |
| A_23_P424513 | -0.7607 | 8.048 | -18.03 | 1.07E-07 | 2.54E-05 | 10.02 | <a href="#">10048</a>  | RANBP9  | RAN binding protein 9                                                                       | <a href="#">ENSG00000010017</a> |
| A_24_P108779 | -0.7702 | 6.784 | -18.08 | 1.04E-07 | 2.52E-05 | 10.04 | <a href="#">79734</a>  | KCTD17  | potassium channel tetramerisation domain containing 17                                      | <a href="#">ENSG00000100379</a> |
| A_23_P252052 | -0.5774 | 6.986 | -18.13 | 1.02E-07 | 2.48E-05 | 10.06 | <a href="#">11259</a>  | FILIP1L | filamin A interacting protein 1-like                                                        | <a href="#">ENSG00000168386</a> |
| A_23_P121405 | -0.7575 | 8.51  | -18.16 | 1.00E-07 | 2.47E-05 | 10.07 | <a href="#">29890</a>  | RBM15B  | RNA binding motif protein 15B                                                               | <a href="#">ENSG00000179837</a> |
| A_23_P125408 | -1.091  | 8.538 | -18.16 | 1.01E-07 | 2.47E-05 | 10.06 | <a href="#">83475</a>  | DOHH    | deoxyhypusine hydroxylase/monooxygenase                                                     | <a href="#">ENSG00000129932</a> |
| A_23_P52219  | -0.7393 | 7.75  | -18.21 | 9.85E-08 | 2.44E-05 | 10.08 | <a href="#">10613</a>  | ERLIN1  | ER lipid raft associated 1                                                                  | <a href="#">ENSG00000107566</a> |
| A_24_P283928 | -0.686  | 7.234 | -18.21 | 9.84E-08 | 2.44E-05 | 10.08 | <a href="#">79035</a>  | OBFC2B  | oligonucleotide/oligosaccharide-binding fold containing 2B                                  | <a href="#">ENSG00000139579</a> |
| A_23_P77776  | -0.5696 | 11.49 | -18.26 | 9.62E-08 | 2.43E-05 | 10.1  | <a href="#">6427</a>   | SFRS2   | splicing factor arginine/serine-rich 2                                                      | <a href="#">ENSG00000161547</a> |
| A_23_P148372 | -0.7703 | 9.884 | -18.4  | 9.07E-08 | 2.39E-05 | 10.15 | <a href="#">1478</a>   | CSTF2   | cleavage stimulation factor 3' pre-RNA subunit 2 64kDa                                      | <a href="#">ENSG00000101811</a> |
| A_23_P46964  | -0.838  | 7.875 | -18.48 | 8.77E-08 | 2.35E-05 | 10.18 | <a href="#">55662</a>  | HIF1AN  | hypoxia inducible factor 1 alpha subunit inhibitor                                          | <a href="#">ENSG00000166135</a> |
| A_23_P64954  | -0.7914 | 7.937 | -18.58 | 8.41E-08 | 2.35E-05 | 10.21 | <a href="#">8078</a>   | USP5    | ubiquitin specific peptidase 5 (isopeptidase T)                                             | <a href="#">ENSG00000111667</a> |
| A_23_P117797 | -0.9377 | 8.429 | -18.79 | 7.71E-08 | 2.25E-05 | 10.29 | <a href="#">54982</a>  | CLN6    | ceroid-lipofuscinosis neuronal 6 late infantile variant                                     | <a href="#">ENSG00000128973</a> |
| A_23_P126457 | -0.727  | 7.967 | -18.82 | 7.62E-08 | 2.25E-05 | 10.29 | <a href="#">81875</a>  | ISG20L2 | interferon stimulated exonuclease gene 20kDa-like 2                                         | <a href="#">ENSG00000143319</a> |
| A_23_P164000 | -1.273  | 9.676 | -18.82 | 7.64E-08 | 2.25E-05 | 10.29 | <a href="#">26168</a>  | SEN3    | SUMO1/sentrin/SMT3 specific peptidase 3                                                     | <a href="#">ENSG00000161956</a> |
| A_32_P150130 | -0.9575 | 6.627 | -18.89 | 7.40E-08 | 2.25E-05 | 10.32 | <a href="#">59339</a>  | PLEKHA2 | pleckstrin homology domain containing family A (phosphoinositide binding specific) member 2 | <a href="#">ENSG00000169499</a> |
| A_24_P93887  | -0.71   | 8.078 | -18.9  | 7.38E-08 | 2.25E-05 | 10.32 | <a href="#">55588</a>  | MED29   | mediator complex subunit 29                                                                 | <a href="#">ENSG00000063322</a> |
| A_23_P141738 | -0.7183 | 8.144 | -18.94 | 7.27E-08 | 2.25E-05 | 10.33 | <a href="#">6760</a>   | SS18    | synovial sarcoma translocation chromosome 18                                                | <a href="#">ENSG00000141380</a> |
| A_23_P103070 | -0.7371 | 9.142 | -19.08 | 6.86E-08 | 2.19E-05 | 10.38 | <a href="#">7533</a>   | YWHAH   | tyrosine 3-monooxygenase/tryptophan 5-monooxygenase activation protein eta polypeptide      | <a href="#">ENSG00000128245</a> |
| A_24_P141629 | -0.6967 | 7.515 | -19.09 | 6.82E-08 | 2.19E-05 | 10.38 | <a href="#">63901</a>  | FAM111A | family with sequence similarity 111 member A                                                | <a href="#">ENSG00000166801</a> |
| A_23_P44617  | -0.7157 | 8.237 | -19.16 | 6.63E-08 | 2.15E-05 | 10.41 | <a href="#">22820</a>  | COPG    | coatmer protein complex subunit gamma                                                       | <a href="#">ENSG00000181789</a> |
| A_24_P48139  | -0.7366 | 7.064 | -19.27 | 6.36E-08 | 2.12E-05 | 10.44 | <a href="#">23536</a>  | ADAT1   | adenosine deaminase tRNA-specific 1                                                         | <a href="#">ENSG00000065457</a> |
| A_23_P310590 | -0.6246 | 6.654 | -19.32 | 6.22E-08 | 2.09E-05 | 10.46 | <a href="#">220323</a> | OAF     | OAF homolog (Drosophila)                                                                    | <a href="#">ENSG00000184232</a> |
| A_24_P236251 | -1.079  | 6.193 | -19.33 | 6.20E-08 | 2.09E-05 | 10.46 | <a href="#">8788</a>   | DLK1    | delta-like 1 homolog (Drosophila)                                                           | <a href="#">ENSG00000185559</a> |
| A_23_P17430  | -1.157  | 6.755 | -19.44 | 5.94E-08 | 2.06E-05 | 10.5  | <a href="#">55544</a>  | RBM38   | RNA binding motif protein 38                                                                | <a href="#">ENSG00000132819</a> |

|              |         |       |        |          |          |       |                        |          |                                                                                 |                                 |
|--------------|---------|-------|--------|----------|----------|-------|------------------------|----------|---------------------------------------------------------------------------------|---------------------------------|
| A_32_P12610  | -0.7468 | 8.359 | -19.47 | 5.86E-08 | 2.06E-05 | 10.51 | <a href="#">1876</a>   | E2F6     | E2F transcription factor 6                                                      | <a href="#">ENSG00000169016</a> |
| A_23_P100196 | -0.9002 | 9.098 | -19.55 | 5.68E-08 | 2.04E-05 | 10.53 | <a href="#">9100</a>   | USP10    | ubiquitin specific peptidase 10                                                 | <a href="#">ENSG00000103194</a> |
| A_24_P124973 | -0.6956 | 6.236 | -19.65 | 5.46E-08 | 1.98E-05 | 10.57 | <a href="#">56160</a>  | NDNL2    | necdin-like 2                                                                   | <a href="#">ENSG00000185115</a> |
| A_23_P42065  | -1.253  | 8.074 | -19.66 | 5.43E-08 | 1.98E-05 | 10.57 | <a href="#">27242</a>  | TNFRSF21 | tumor necrosis factor receptor superfamily member 21                            | <a href="#">ENSG00000146072</a> |
| A_24_P278367 | -0.8186 | 9.659 | -19.7  | 5.36E-08 | 1.98E-05 | 10.58 | <a href="#">10121</a>  | ACTR1A   | ARP1 actin-related protein 1 homolog A centractin alpha (yeast)                 | <a href="#">ENSG00000138107</a> |
| A_32_P159347 | -0.8827 | 11.11 | -19.77 | 5.22E-08 | 1.97E-05 | 10.6  | <a href="#">220988</a> | HNRNPA3  | heterogeneous nuclear ribonucleoprotein A3                                      | <a href="#">ENSG00000170144</a> |
| A_23_P23303  | -0.9883 | 8.707 | -19.95 | 4.86E-08 | 1.89E-05 | 10.66 | <a href="#">9156</a>   | EXO1     | exonuclease 1                                                                   | <a href="#">ENSG00000174371</a> |
| A_23_P81463  | -0.7776 | 7.525 | -20.02 | 4.72E-08 | 1.86E-05 | 10.68 | <a href="#">54505</a>  | DHX29    | DEAH (Asp-Glu-Ala-His) box polypeptide 29                                       | <a href="#">ENSG00000067248</a> |
| A_24_P394246 | -1.014  | 7.911 | -20.25 | 4.32E-08 | 1.81E-05 | 10.75 | <a href="#">51246</a>  | SHISA5   | shisa homolog 5 ( <i>Xenopus laevis</i> )                                       | <a href="#">ENSG00000164054</a> |
| A_24_P276864 | -1.478  | 8.76  | -20.32 | 4.21E-08 | 1.81E-05 | 10.77 | <a href="#">55627</a>  | SMPD4    | sphingomyelin phosphodiesterase 4 neutral membrane (neutral sphingomyelinase-3) | <a href="#">ENSG00000136699</a> |
| A_23_P346405 | -0.7317 | 6.48  | -20.35 | 4.16E-08 | 1.80E-05 | 10.78 | <a href="#">90550</a>  | CCDC109A | coiled-coil domain containing 109A                                              | <a href="#">ENSG00000156026</a> |
| A_23_P501770 | -0.8546 | 6.78  | -20.43 | 4.03E-08 | 1.78E-05 | 10.81 | <a href="#">84126</a>  | ATRIP    | ATR interacting protein                                                         | <a href="#">ENSG00000164053</a> |
| A_23_P102965 | -0.7788 | 7.731 | -20.9  | 3.38E-08 | 1.65E-05 | 10.94 | <a href="#">23786</a>  | BCL2L13  | BCL2-like 13 (apoptosis facilitator)                                            | <a href="#">ENSG00000099968</a> |
| A_23_P163481 | -0.8182 | 9.162 | -20.9  | 3.38E-08 | 1.65E-05 | 10.94 | <a href="#">701</a>    | BUB1B    | budding uninhibited by benzimidazoles 1 homolog beta (yeast)                    | <a href="#">ENSG00000156970</a> |
| A_23_P374782 | -0.7696 | 9.061 | -20.98 | 3.28E-08 | 1.64E-05 | 10.96 | <a href="#">30011</a>  | SH3KBP1  | SH3-domain kinase binding protein 1                                             | <a href="#">ENSG00000147010</a> |
| A_23_P58588  | -0.9054 | 6.209 | -21.08 | 3.17E-08 | 1.60E-05 | 10.99 | <a href="#">6586</a>   | SLIT3    | slit homolog 3 ( <i>Drosophila</i> )                                            | <a href="#">ENSG00000184347</a> |
| A_23_P56630  | -1.033  | 7.18  | -21.32 | 2.89E-08 | 1.48E-05 | 11.06 | <a href="#">6772</a>   | STAT1    | signal transducer and activator of transcription 1 91kDa                        | <a href="#">ENSG00000115415</a> |
| A_23_P52986  | -1.007  | 7.189 | -21.65 | 2.57E-08 | 1.38E-05 | 11.15 | <a href="#">220001</a> | VWCE     | von Willebrand factor C and EGF domains                                         | <a href="#">ENSG00000167992</a> |
| A_24_P142269 | -0.8898 | 7.033 | -21.74 | 2.49E-08 | 1.35E-05 | 11.18 | <a href="#">8479</a>   | HIRIP3   | HIRA interacting protein 3                                                      | <a href="#">ENSG00000149929</a> |
| A_24_P126060 | -0.8017 | 9.8   | -21.84 | 2.41E-08 | 1.34E-05 | 11.2  | <a href="#">1654</a>   | DDX3X    | DEAD (Asp-Glu-Ala-Asp) box polypeptide 3 X-linked                               | <a href="#">ENSG00000215301</a> |
| A_23_P63067  | -0.6811 | 13.34 | -22.01 | 2.26E-08 | 1.33E-05 | 11.25 | <a href="#">7818</a>   | DAP3     | death associated protein 3                                                      | <a href="#">ENSG00000132676</a> |
| A_23_P79161  | -0.759  | 12.57 | -22.33 | 2.02E-08 | 1.25E-05 | 11.33 | <a href="#">27166</a>  | PRELID1  | PRELI domain containing 1                                                       | <a href="#">ENSG00000169230</a> |
| A_23_P110606 | -0.7809 | 6.662 | -22.78 | 1.73E-08 | 1.14E-05 | 11.45 | <a href="#">9794</a>   | MAML1    | mastermind-like 1 ( <i>Drosophila</i> )                                         | <a href="#">ENSG00000161021</a> |
| A_23_P19257  | -0.8829 | 10.97 | -22.9  | 1.66E-08 | 1.12E-05 | 11.48 | <a href="#">347734</a> | SLC35B2  | solute carrier family 35 member B2                                              | <a href="#">ENSG00000157593</a> |
| A_24_P101391 | -1.517  | 11.79 | -22.96 | 1.63E-08 | 1.12E-05 | 11.49 | <a href="#">4904</a>   | YBX1     | Y box binding protein 1                                                         | <a href="#">ENSG00000065978</a> |
| A_23_P49521  | -0.8956 | 7.459 | -23.4  | 1.40E-08 | 1.03E-05 | 11.6  | <a href="#">6426</a>   | SFRS1    | splicing factor arginine/serine-rich 1                                          | <a href="#">ENSG00000136450</a> |
| A_24_P96234  | -1.05   | 8.546 | -23.51 | 1.35E-08 | 1.03E-05 | 11.62 | <a href="#">81890</a>  | QTRT1    | queuine tRNA-ribosyltransferase 1                                               | <a href="#">ENSG00000213339</a> |
| A_23_P138105 | -1.535  | 6.797 | -23.72 | 1.26E-08 | 9.79E-06 | 11.67 | <a href="#">54797</a>  | MED18    | mediator complex subunit 18                                                     | <a href="#">ENSG00000130772</a> |
| A_24_P252020 | -0.9346 | 7.147 | -23.77 | 1.24E-08 | 9.79E-06 | 11.68 | <a href="#">90933</a>  | TRIM41   | tripartite motif-containing 41                                                  | <a href="#">ENSG00000146063</a> |
| A_24_P546375 | -1.004  | 6.655 | -24.25 | 1.06E-08 | 8.86E-06 | 11.79 | <a href="#">342096</a> | GOLGA6A  | golgin A6 family member A                                                       | <a href="#">ENSG00000159289</a> |
| A_23_P93823  | -1.182  | 7.54  | -24.29 | 1.05E-08 | 8.86E-06 | 11.8  | <a href="#">5982</a>   | RFC2     | replication factor C (activator 1) 2 40kDa                                      | <a href="#">ENSG00000049541</a> |
| A_23_P337201 | -0.8178 | 9.718 | -24.55 | 9.64E-09 | 8.36E-06 | 11.86 | <a href="#">6731</a>   | SRP72    | signal recognition particle 72kDa                                               | <a href="#">ENSG00000174780</a> |
| A_24_P128205 | -0.8466 | 8.615 | -24.73 | 9.12E-09 | 8.15E-06 | 11.9  | <a href="#">5707</a>   | PSMD1    | proteasome (prosome macropain) 26S subunit non-ATPase 1                         | <a href="#">ENSG00000173692</a> |

|              |         |       |        |          |          |       |                       |          |                                                             |                                 |
|--------------|---------|-------|--------|----------|----------|-------|-----------------------|----------|-------------------------------------------------------------|---------------------------------|
| A_23_P161552 | -1.218  | 7.977 | -25.71 | 6.74E-09 | 7.31E-06 | 12.1  | <a href="#">84364</a> | ARFGAP2  | ADP-ribosylation factor GTPase activating protein 2         | <a href="#">ENSG00000149182</a> |
| A_23_P13338  | -0.9022 | 7.246 | -25.88 | 6.39E-09 | 7.26E-06 | 12.14 | <a href="#">80789</a> | INTS5    | integrator complex subunit 5                                | <a href="#">ENSG00000185085</a> |
| A_24_P36847  | -1.192  | 10.21 | -26.69 | 5.02E-09 | 6.37E-06 | 12.3  | <a href="#">1660</a>  | DHX9     | DEAH (Asp-Glu-Ala-His) box polypeptide 9                    | <a href="#">ENSG00000135829</a> |
| A_23_P153050 | -0.97   | 7.654 | -26.75 | 4.93E-09 | 6.37E-06 | 12.31 | <a href="#">54890</a> | ALKBH5   | alkB alkylation repair homolog 5 (E. coli)                  | <a href="#">ENSG00000091542</a> |
| A_23_P202143 | -1.12   | 7.846 | -27.19 | 4.34E-09 | 6.04E-06 | 12.39 | <a href="#">9221</a>  | NOLC1    | nucleolar and coiled-body phosphoprotein 1                  | <a href="#">ENSG00000166197</a> |
| A_23_P217411 | -1.026  | 9.519 | -27.59 | 3.88E-09 | 6.01E-06 | 12.46 | <a href="#">8243</a>  | SMC1A    | structural maintenance of chromosomes 1A                    | <a href="#">ENSG00000072501</a> |
| A_24_P408083 | -0.9529 | 9.124 | -29.78 | 2.13E-09 | 4.46E-06 | 12.83 | <a href="#">1786</a>  | DNMT1    | DNA (cytosine-5-)-methyltransferase 1                       | <a href="#">ENSG00000130816</a> |
| A_23_P136787 | -2.113  | 7.639 | -31.15 | 1.50E-09 | 3.82E-06 | 13.03 | <a href="#">84296</a> | GINS4    | GINS complex subunit 4 (Sld5 homolog)                       | <a href="#">ENSG00000147536</a> |
| A_23_P162866 | -1.167  | 13.22 | -32.97 | 9.60E-10 | 3.47E-06 | 13.27 | <a href="#">3320</a>  | HSP90AA1 | heat shock protein 90kDa alpha (cytosolic) class A member 1 | <a href="#">ENSG00000080824</a> |
| A_24_P287075 | -1.29   | 7.956 | -34.13 | 7.32E-10 | 2.97E-06 | 13.41 | <a href="#">5871</a>  | MAP4K2   | mitogen-activated protein kinase kinase kinase kinase 2     | <a href="#">ENSG00000168067</a> |
